# Supplementary material
Source: publisher figshare collection journal article supplement (https://acs.figshare.com/ndownloader/files/4196668)
Supplement: Supplementary file 1 [file 4196668]

## Supporting Information

### Synthesis of Bishomoinositols and an Entry for Construction of Substituted 3-oxabicyclo[3.3.1]nonane Skeleton

Arif Baran,<sup>†,\*</sup> Merve Bekarlar,<sup>‡</sup> Gökay Aydın,<sup>†</sup> Mehmet Nebioglu,<sup>†</sup>

Ertan Şahin,<sup>§</sup> and Metin Balci<sup>‡,\*</sup>

*Department of Chemistry, Middle East Technical University, 06531 Ankara, Turkey*

*Department of Chemistry, Sakarya University, 54100 Sakarya, Turkey*

*Department of Chemistry, Atatürk University, 25240 Erzurum, Turkey*

#### Table of Contents

|                                                                              |    |
|------------------------------------------------------------------------------|----|
| Title                                                                        | 1  |
| <sup>1</sup> H-NMR spectrum for <b>9</b>                                     | 3  |
| Expanded <sup>1</sup> H-NMR spectrum for <b>9</b>                            | 3  |
| <sup>13</sup> C-NMR spectrum for <b>9</b>                                    | 4  |
| <sup>1</sup> H-NMR spectrum for <b>10</b>                                    | 4  |
| <sup>1</sup> H-NMR spectrum in benzene-d <sub>6</sub> for <b>10</b>          | 5  |
| Expanded <sup>1</sup> H-NMR spectrum in benzene-d <sub>6</sub> for <b>10</b> | 5  |
| <sup>13</sup> C-NMR spectrum for <b>10</b>                                   | 6  |
| DEPT Spectrum for <b>10</b>                                                  | 6  |
| COSY Spectrum for <b>10</b>                                                  | 7  |
| HETCOR Spectrum for <b>10</b>                                                | 8  |
| NOESY Spectrum for <b>10</b>                                                 | 9  |
| <sup>1</sup> H-NMR spectrum for <b>11</b>                                    | 9  |
| <sup>13</sup> C-NMR spectrum for <b>11</b>                                   | 10 |
| DEPT Spectrum for <b>11</b>                                                  | 10 |
| COSY Spectrum for <b>11</b>                                                  | 11 |
| HETCOR Spectrum for <b>11</b>                                                | 11 |
| <sup>1</sup> H-NMR spectrum for <b>12</b>                                    | 12 |
| <sup>13</sup> C-NMR spectrum for <b>12</b>                                   | 12 |
| DEPT Spectrum for <b>12</b>                                                  | 13 |
| COSY Spectrum for <b>12</b>                                                  | 13 |
| HETCOR Spectrum for <b>12</b>                                                | 14 |
| <sup>1</sup> H-NMR spectrum for <b>13</b>                                    | 15 |
| <sup>13</sup> C-NMR spectrum for <b>13</b>                                   | 15 |
| DEPT Spectrum for <b>13</b>                                                  | 16 |
| COSY Spectrum for <b>13</b>                                                  | 16 |
| HETCOR Spectrum for <b>13</b>                                                | 17 |

|                                                     |    |
|-----------------------------------------------------|----|
| <sup>1</sup> H-NMR spectrum for <b>14</b>           | 17 |
| Expanded <sup>1</sup> H-NMR spectrum for <b>14</b>  | 18 |
| <sup>13</sup> C-NMR spectrum for <b>14</b>          | 18 |
| Expanded <sup>13</sup> C-NMR spectrum for <b>14</b> | 19 |
| <sup>1</sup> H-NMR spectrum for <b>18</b>           | 19 |
| <sup>13</sup> C-NMR spectrum for <b>18</b>          | 20 |
| COSY Spectrum for <b>18</b>                         | 20 |
| HETCOR Spectrum for <b>18</b>                       | 21 |
| <sup>1</sup> H-NMR spectrum for <b>19</b>           | 21 |
| <sup>13</sup> C-NMR spectrum for <b>19</b>          | 22 |
| <sup>1</sup> H-NMR spectrum for <b>20</b>           | 22 |
| <sup>13</sup> C-NMR spectrum for <b>20</b>          | 23 |
| COSY Spectrum for <b>20</b>                         | 23 |
| HETCOR Spectrum for <b>20</b>                       | 24 |
| <sup>1</sup> H-NMR spectrum for <b>22</b>           | 24 |
| <sup>13</sup> C-NMR spectrum for <b>22</b>          | 25 |
| <sup>1</sup> H-NMR spectrum for <b>21</b>           | 25 |
| <sup>13</sup> C-NMR spectrum for <b>21</b>          | 26 |
| COSY Spectrum for <b>21</b>                         | 26 |
| HETCOR Spectrum for <b>21</b>                       | 27 |
| <sup>1</sup> H-NMR spectrum for <b>23</b>           | 27 |
| <sup>13</sup> C-NMR spectrum for <b>23</b>          | 28 |
| <sup>1</sup> H-NMR spectrum for <b>24</b>           | 28 |
| Expanded <sup>1</sup> H-NMR spectrum for <b>24</b>  | 29 |
| Expanded <sup>1</sup> H-NMR spectrum for <b>24</b>  | 30 |
| <sup>13</sup> C-NMR spectrum for <b>24</b>          | 31 |
| DEPT Spectrum for <b>24</b>                         | 31 |
| COSY Spectrum for <b>24</b>                         | 32 |
| Expanded COSY Spectrum for <b>24</b>                | 32 |
| HETCOR Spectrum for <b>24</b>                       | 33 |
| Expanded HETCOR Spectrum for <b>24</b>              | 33 |
| <sup>1</sup> H-NMR spectrum for <b>25</b>           | 34 |
| <sup>13</sup> C-NMR spectrum for <b>25</b>          | 34 |
| COSY Spectrum for <b>25</b>                         | 35 |
| <sup>1</sup> H-NMR spectrum for <b>26</b>           | 35 |
| Expanded <sup>1</sup> H-NMR spectrum for <b>26</b>  | 36 |
| Expanded <sup>1</sup> H-NMR spectrum for <b>26</b>  | 36 |
| Expanded <sup>1</sup> H-NMR spectrum for <b>26</b>  | 37 |
| <sup>13</sup> C-NMR spectrum for <b>26</b>          | 37 |
| DEPT Spectrum for <b>26</b>                         | 38 |
| COSY Spectrum for <b>26</b>                         | 38 |
| <sup>1</sup> H-NMR spectrum for <b>27</b>           | 39 |
| Expanded <sup>1</sup> H-NMR spectrum for <b>27</b>  | 39 |
| Expanded <sup>1</sup> H-NMR spectrum for <b>27</b>  | 40 |
| <sup>13</sup> C-NMR spectrum for <b>27</b>          | 40 |
| COSY Spectrum for <b>27</b>                         | 41 |
| HMBC Spectrum for <b>24</b>                         | 41 |
| X-ray Structural Analysis                           | 42 |
| Experimental General                                | 44 |

$^1\text{H-NMR}$  in  $\text{CDCl}_3$

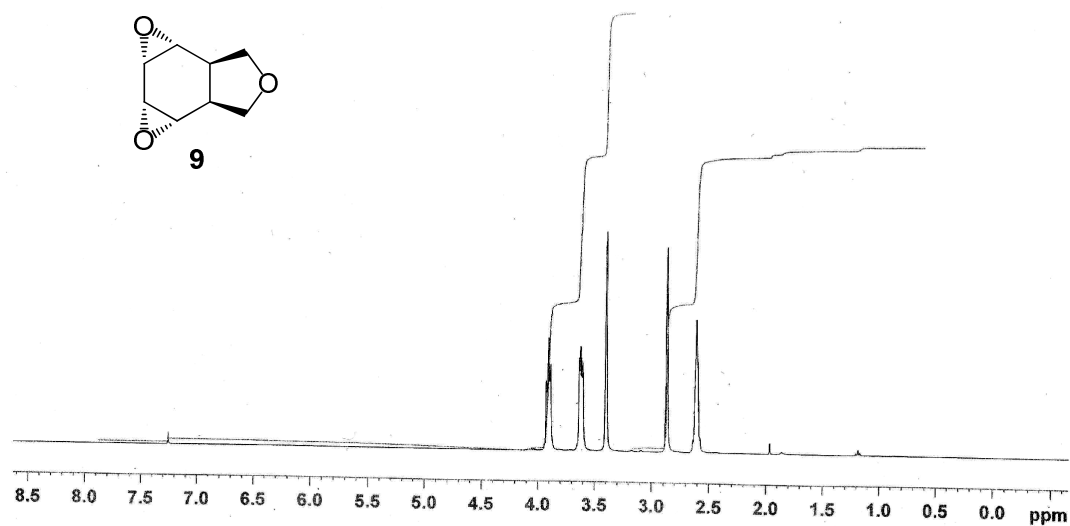

expanded  $^1\text{H-NMR}$  spectrum

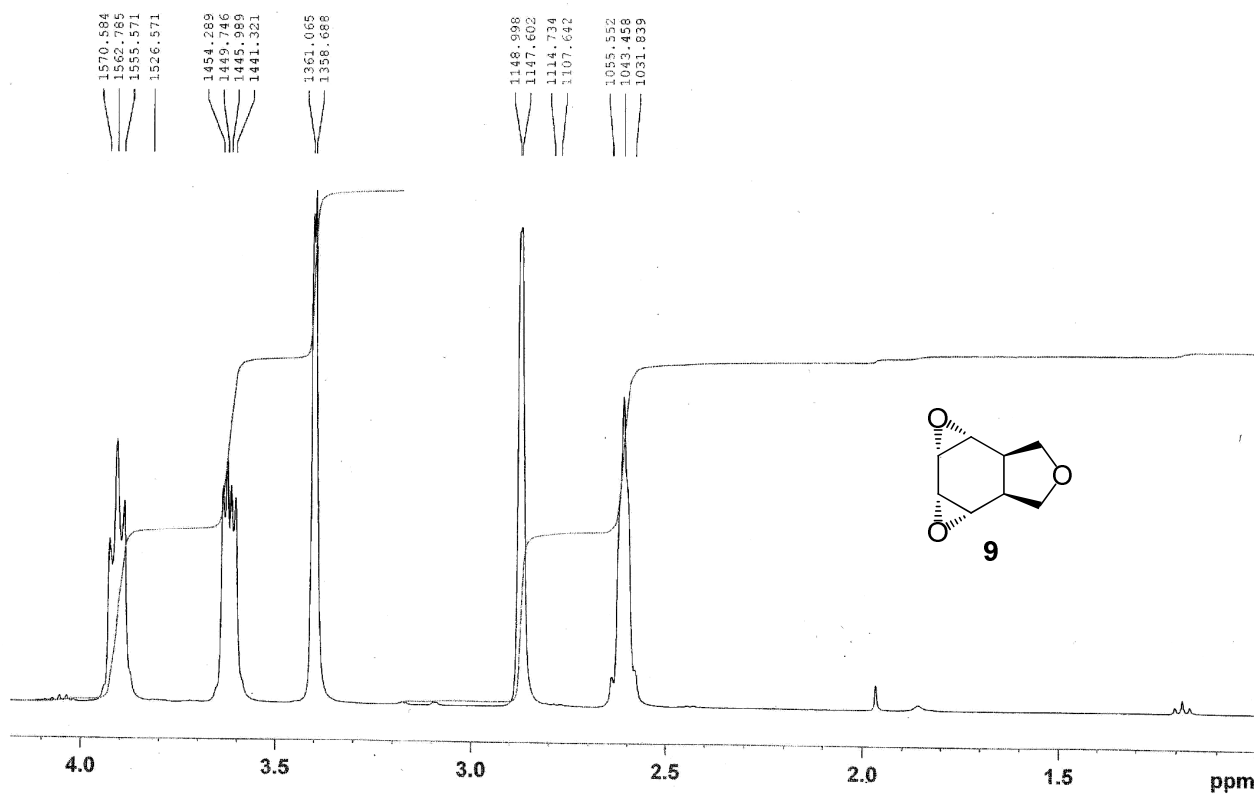

**$^{13}\text{C}$ -NMR in  $\text{CDCl}_3$**

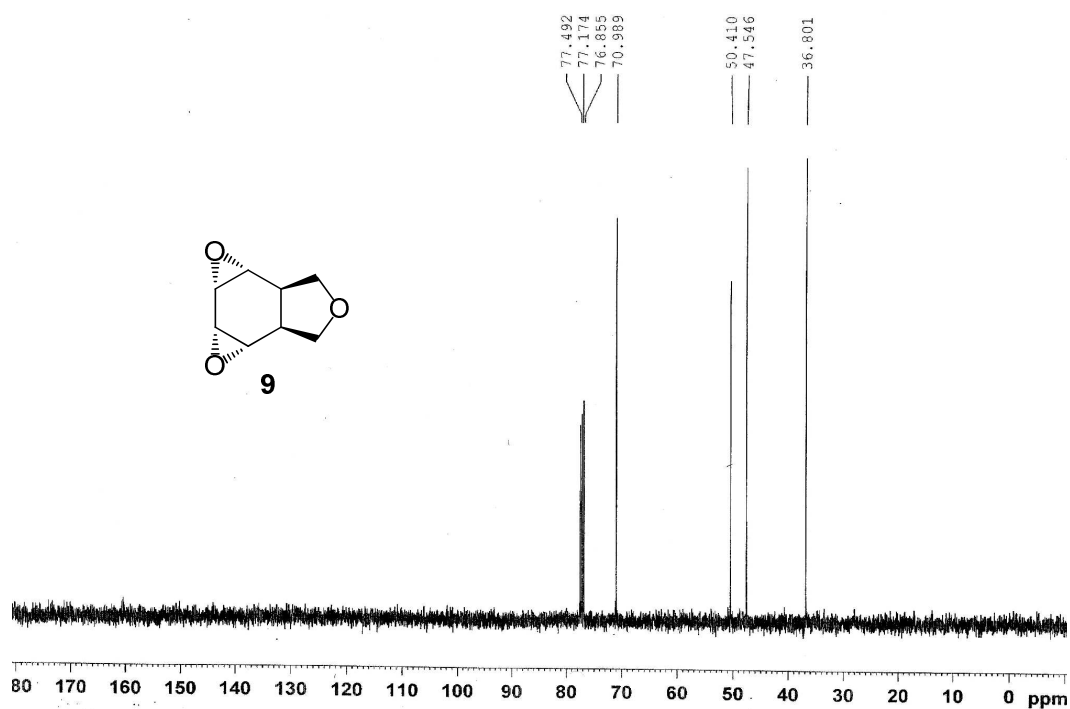

**$^1\text{H}$ -NMR in  $\text{CDCl}_3$**

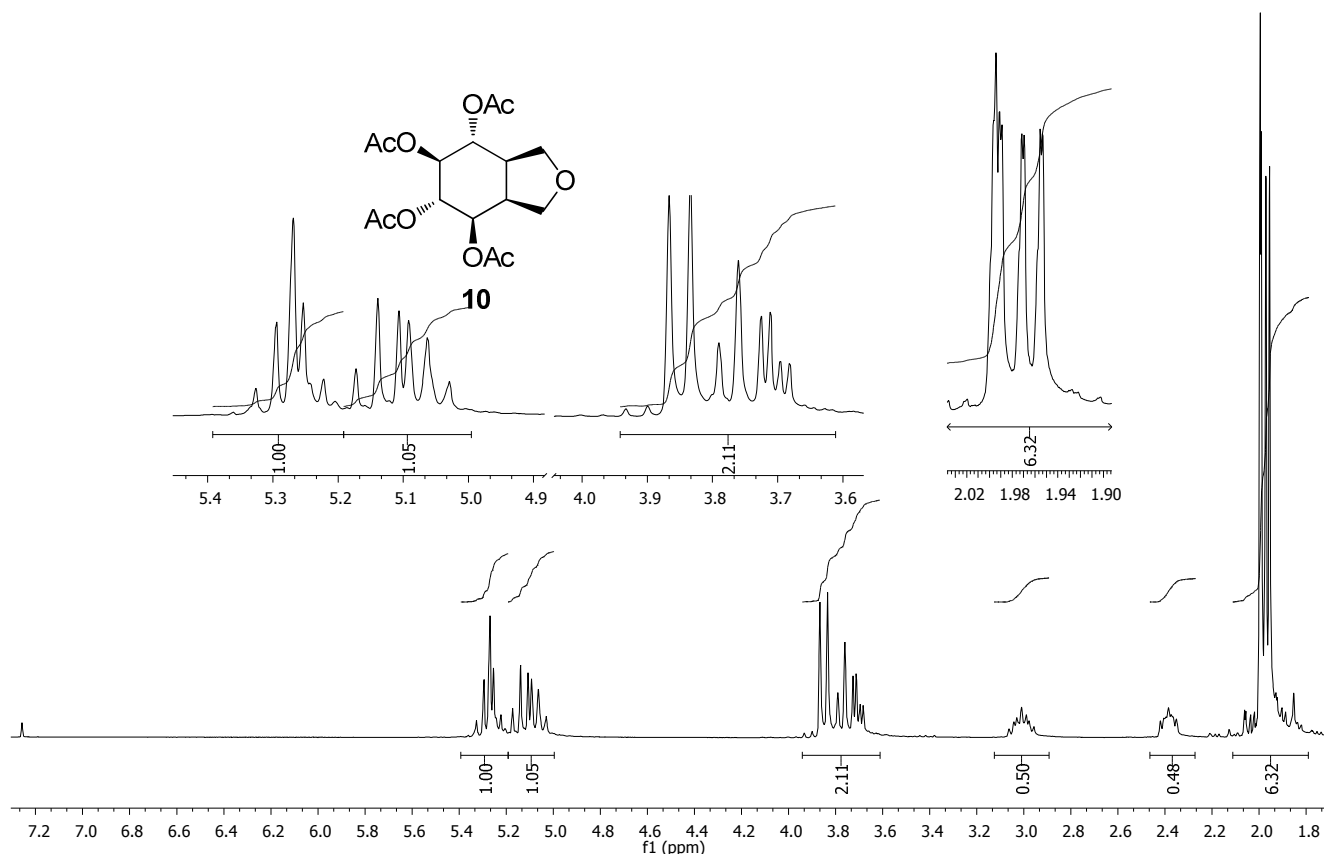

# <sup>1</sup>H NMR in benzene-d<sub>6</sub>

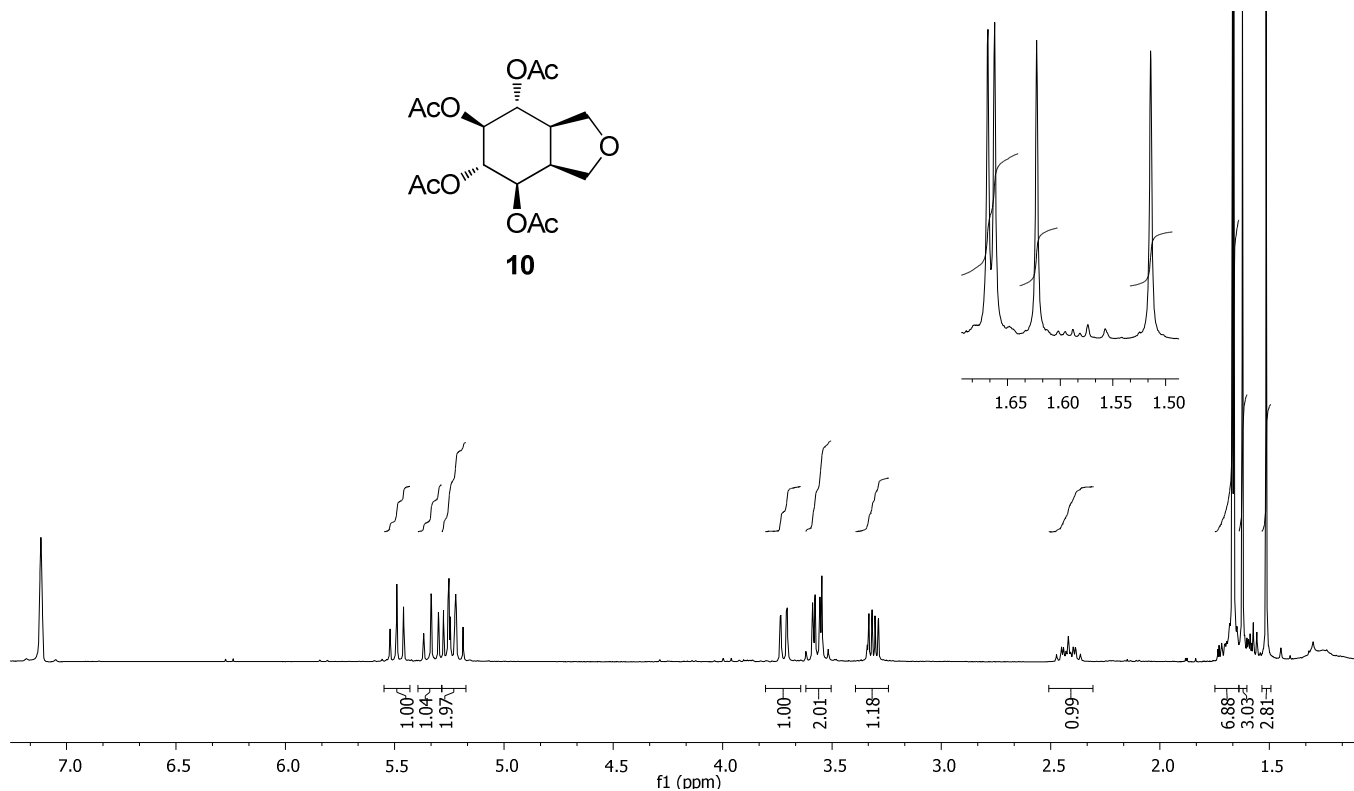

## <sup>1</sup>H-NMR in benzene-d<sub>6</sub> (expanded)

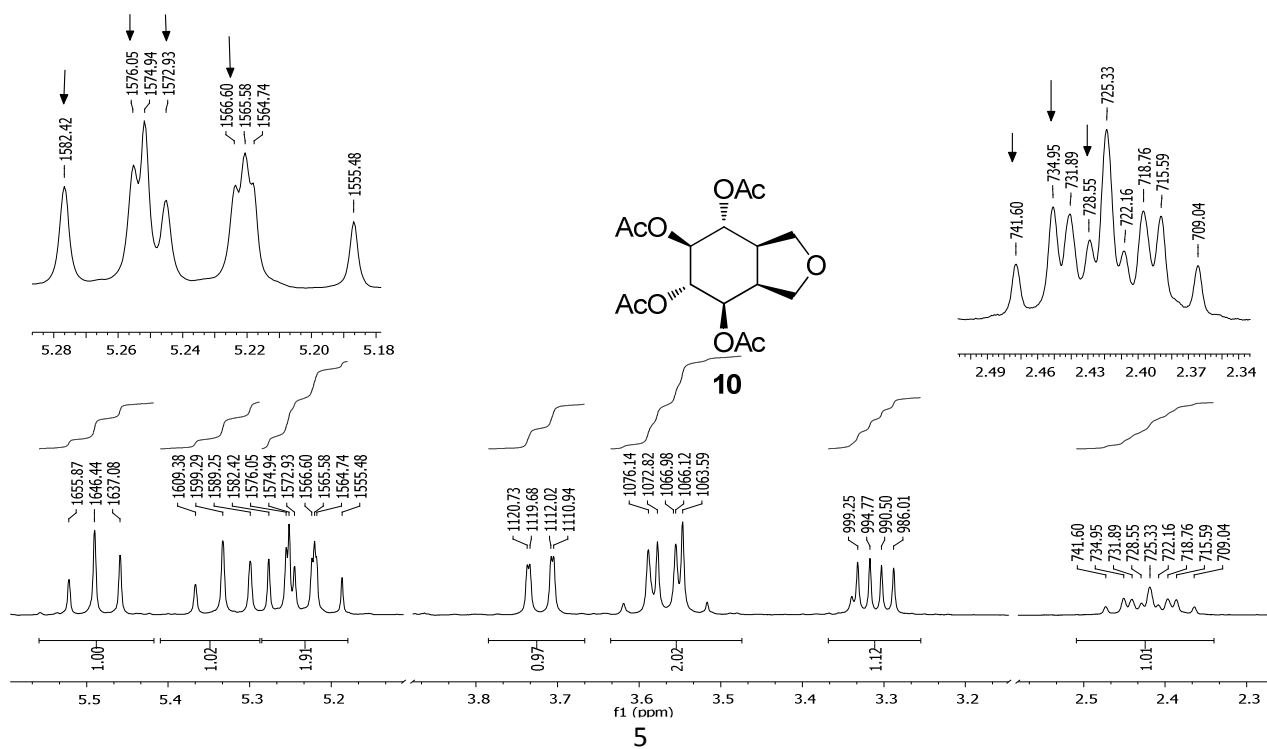

# <sup>13</sup>C-NMR in benzene-d<sub>6</sub>

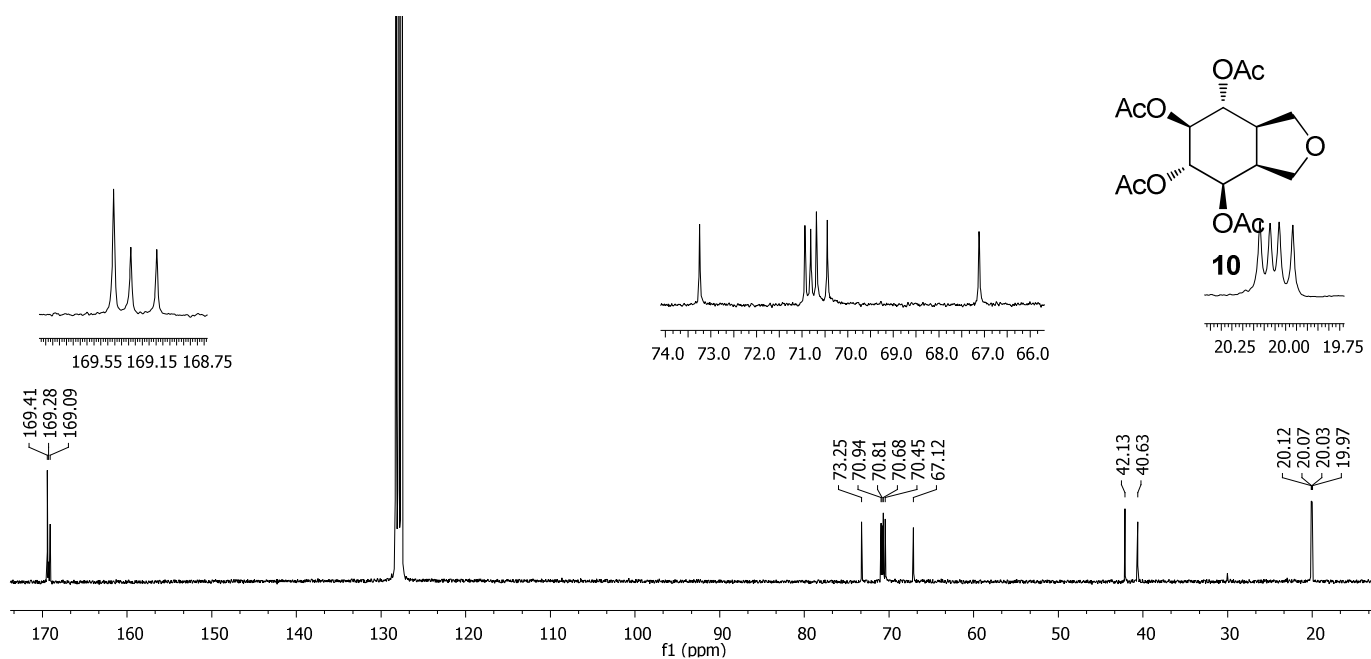

## DEPT spectrum

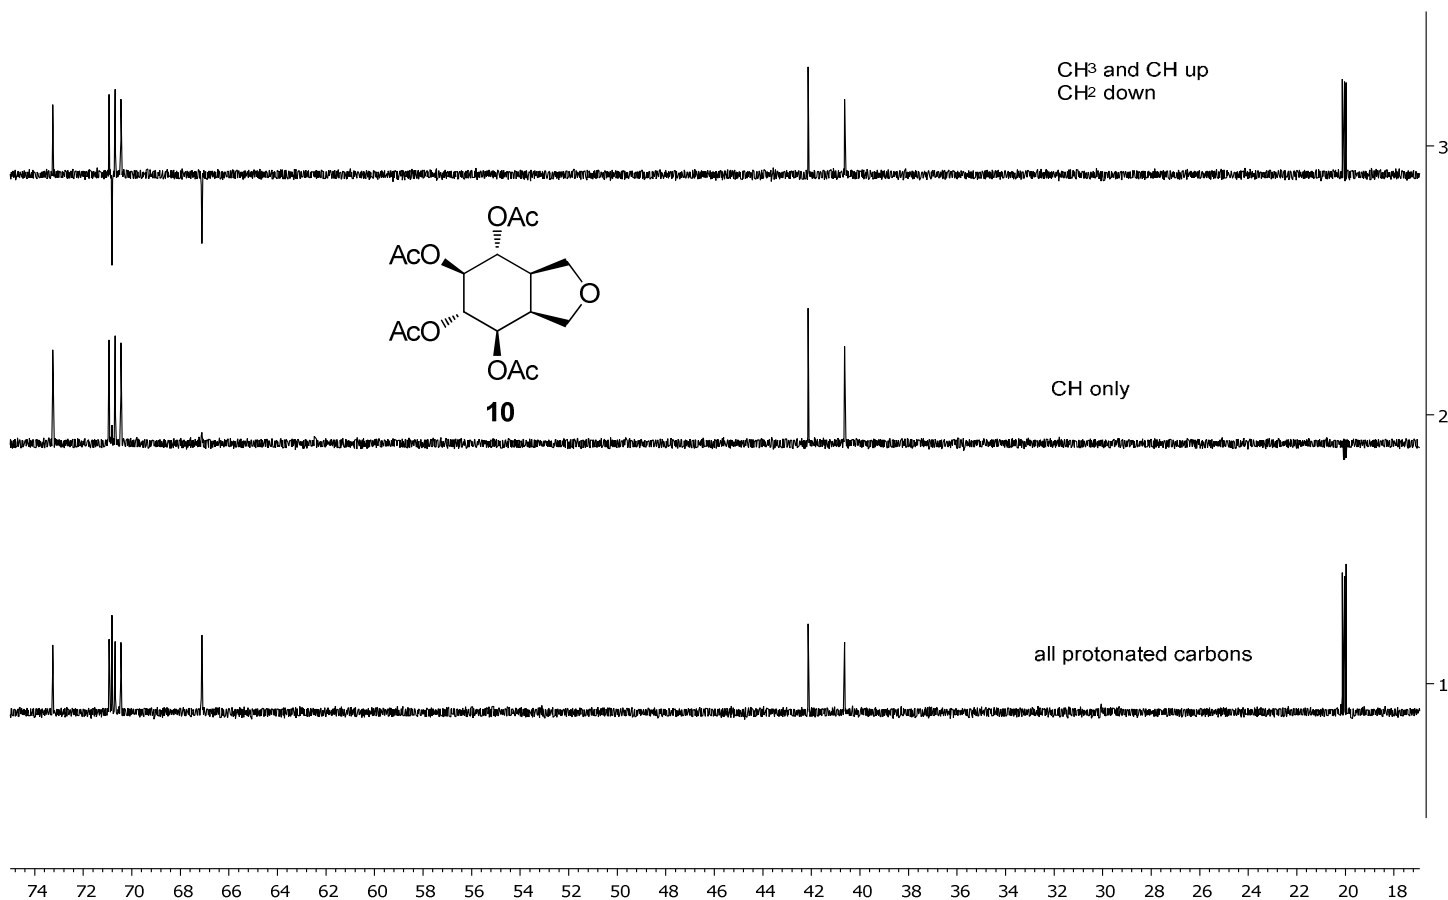

# COSY spectrum

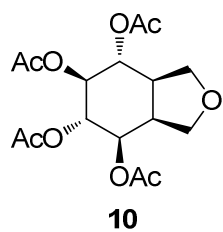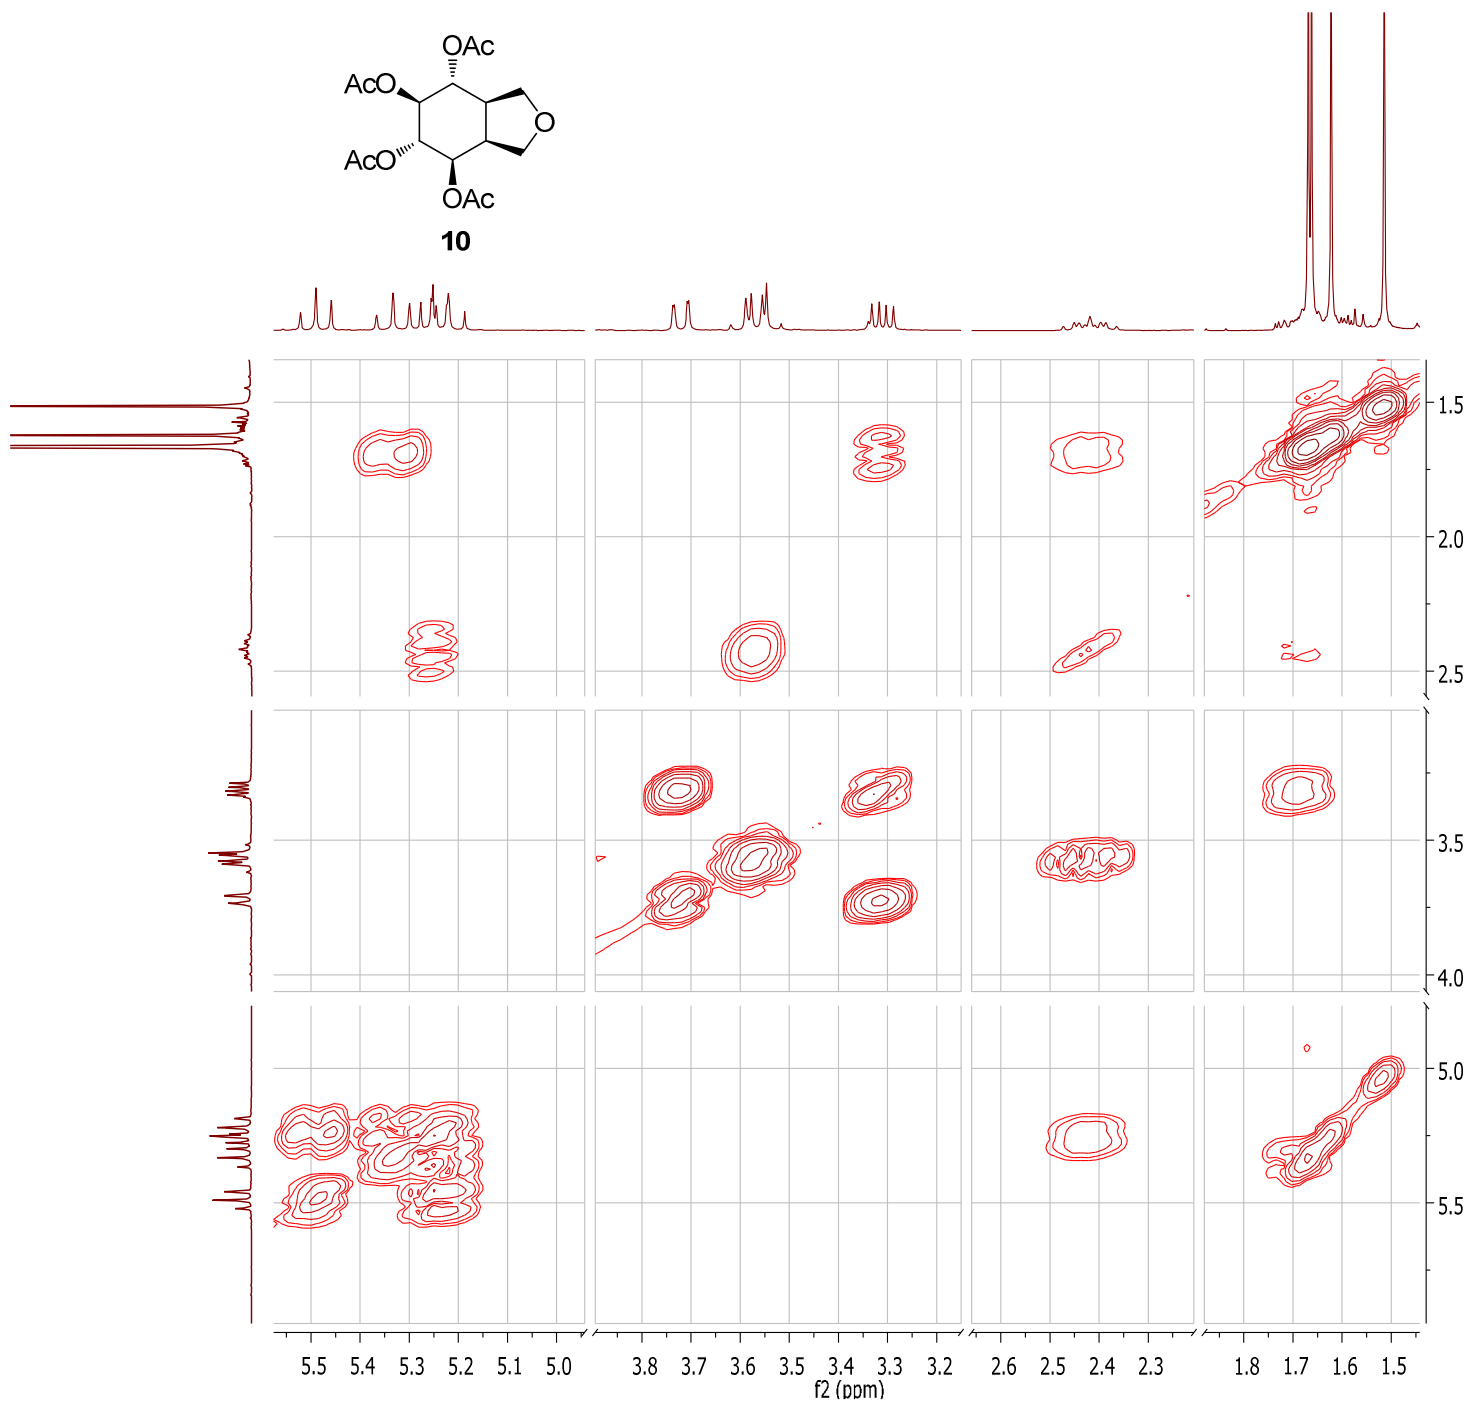

# HETCOR

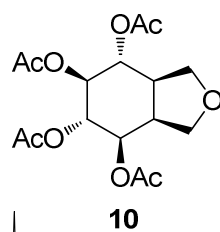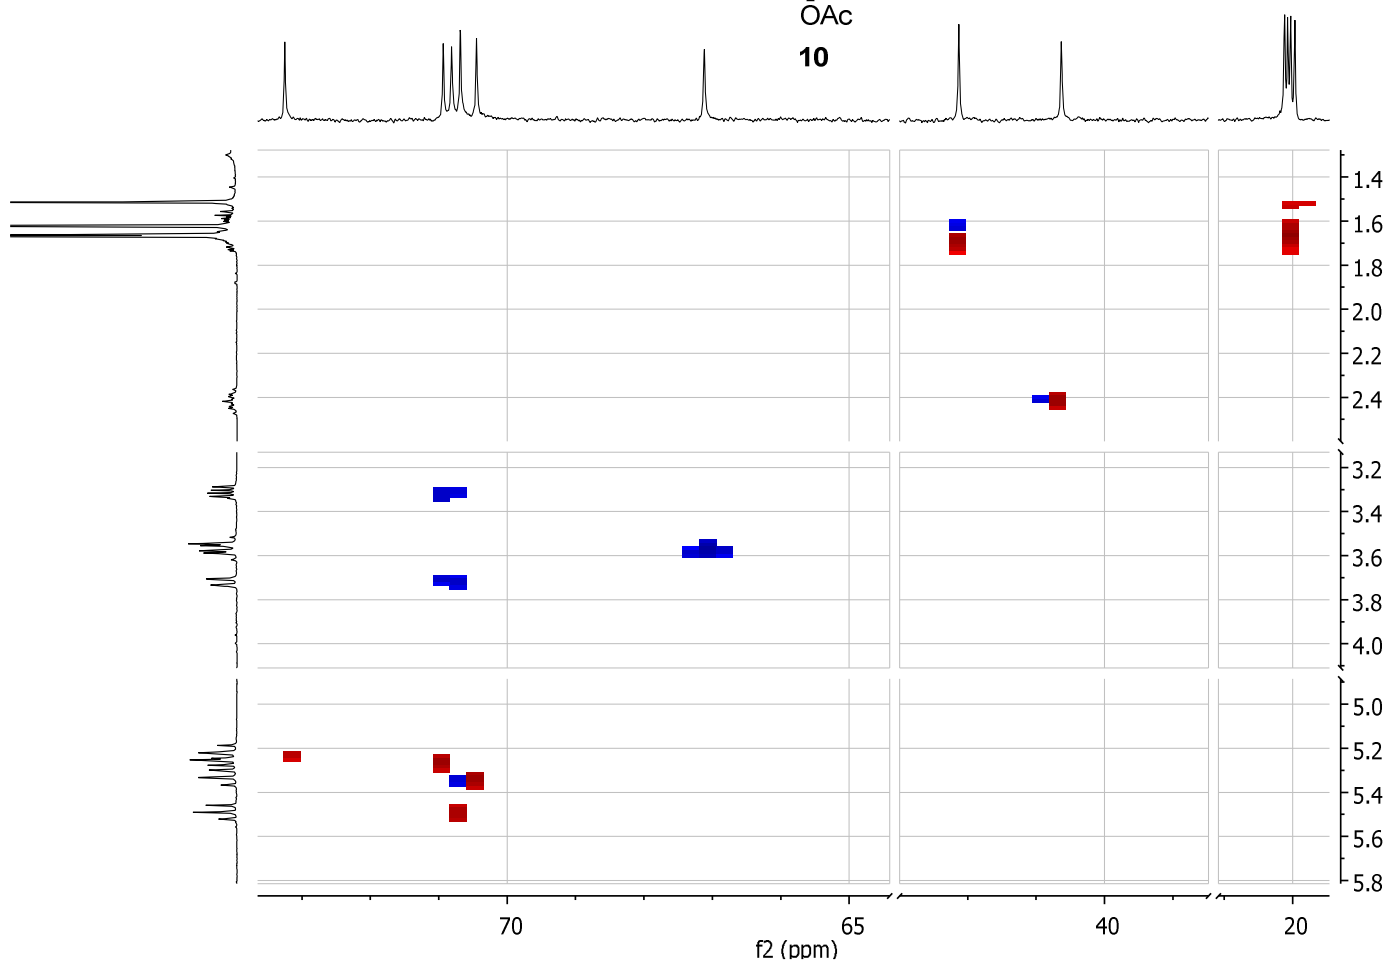



# NOESY spectrum

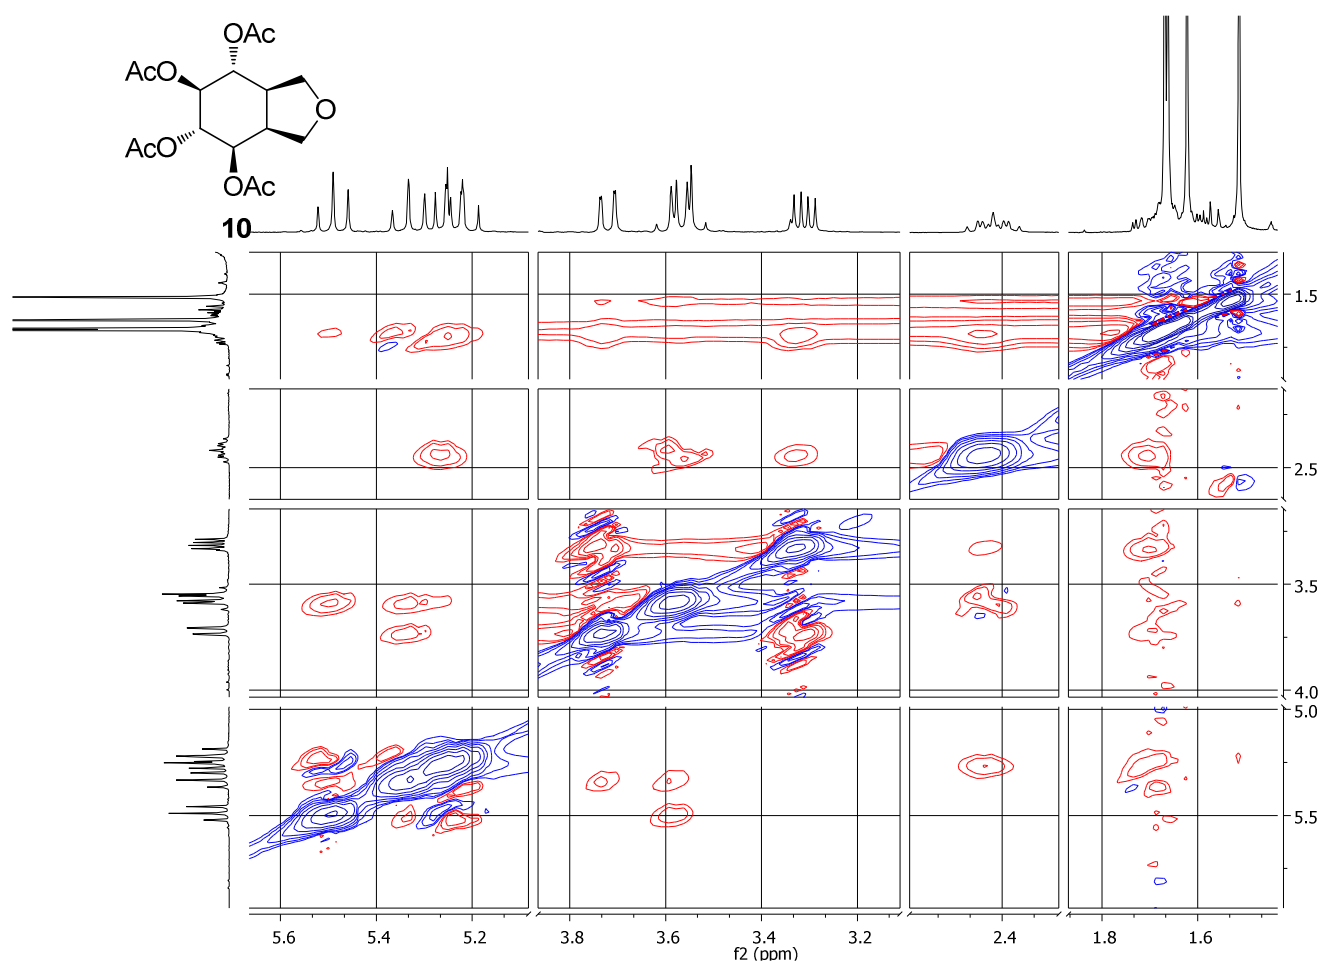

# $^1\text{H}$ NMR in $\text{CDCl}_3$

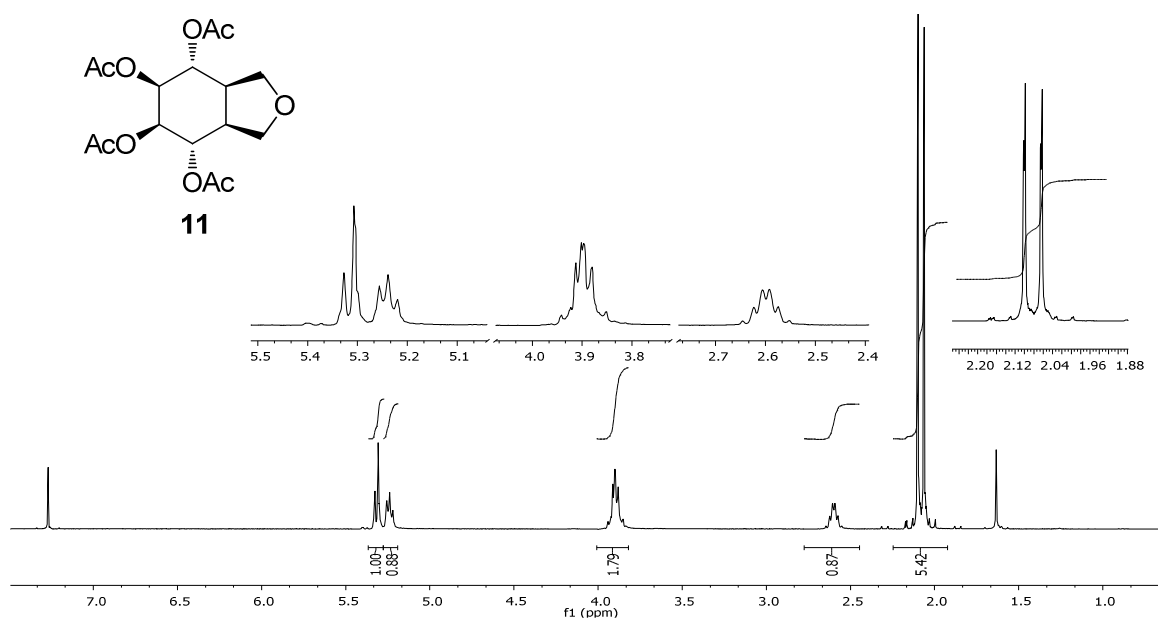

# <sup>13</sup>C NMR spectrum

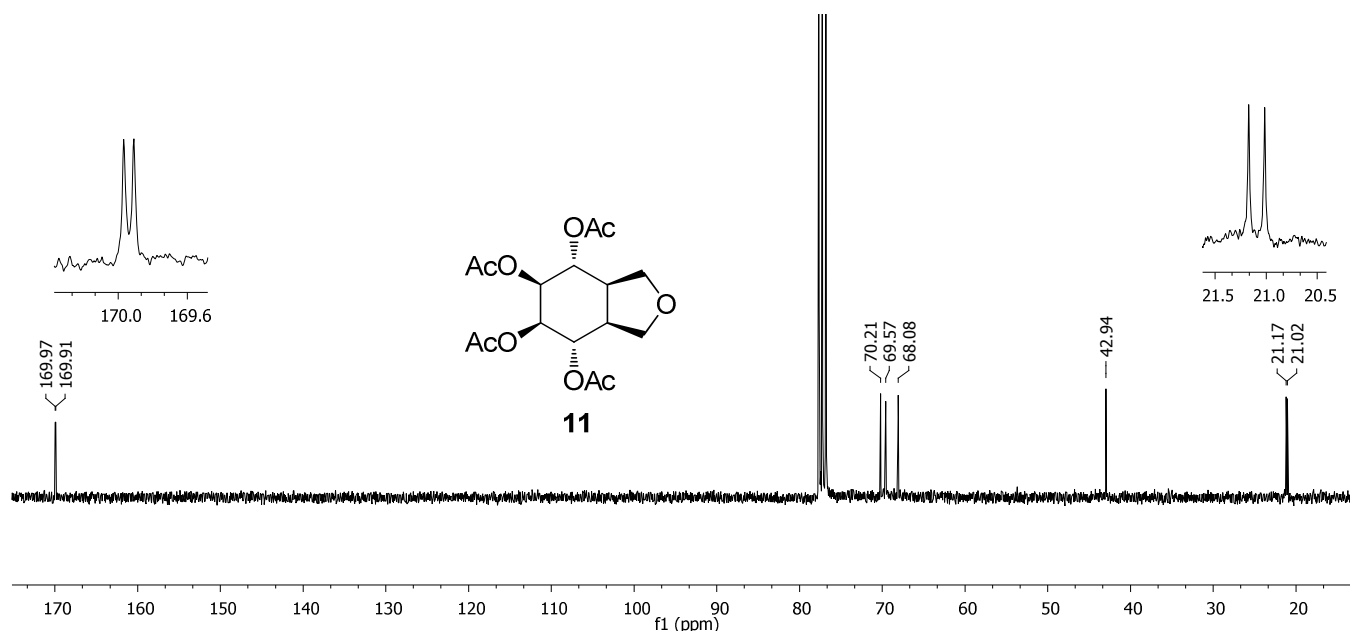

## DEPT

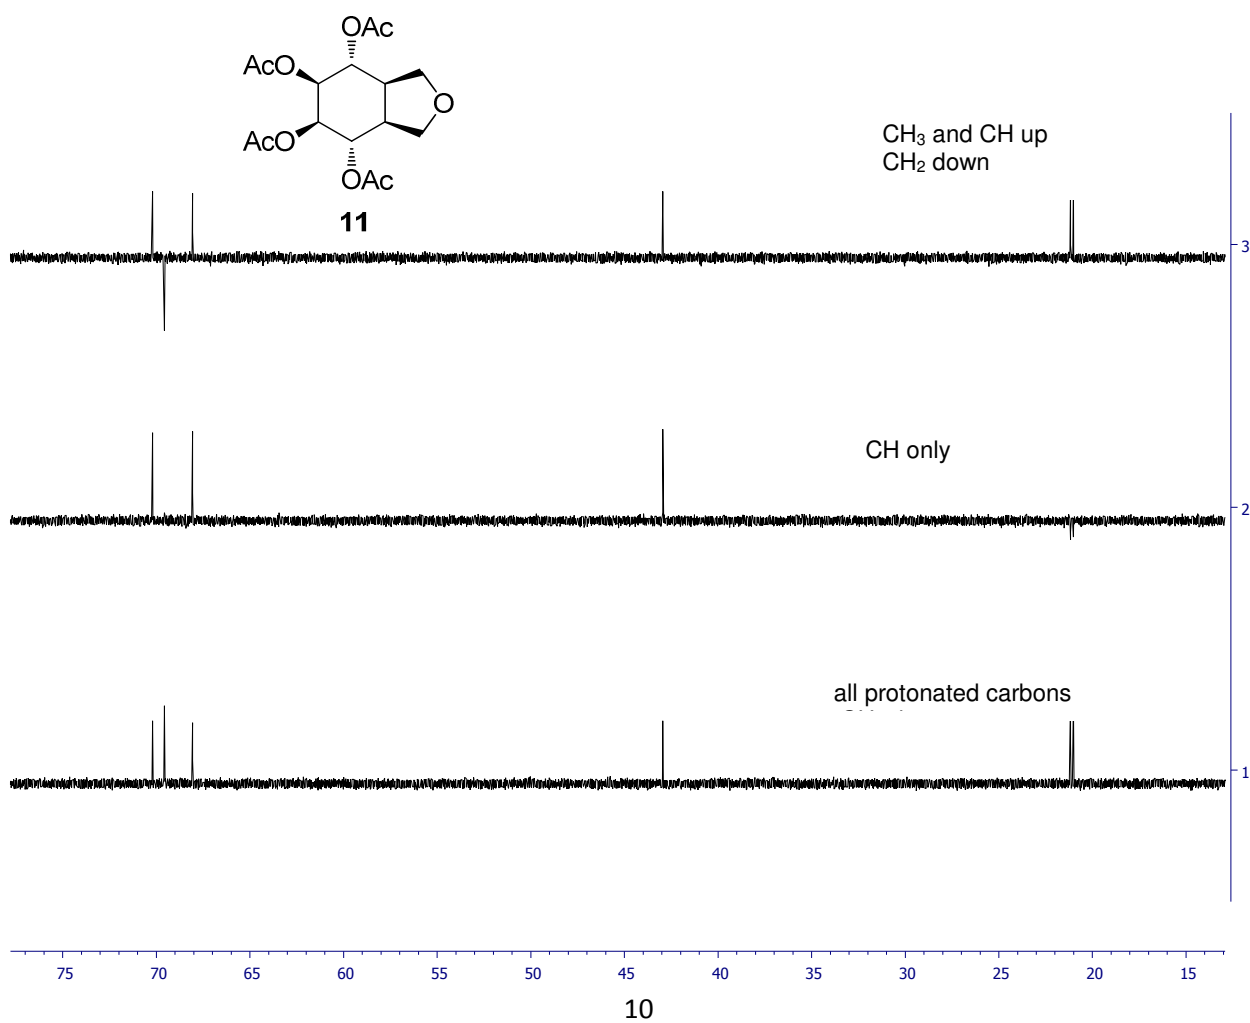

## COSY spectrum

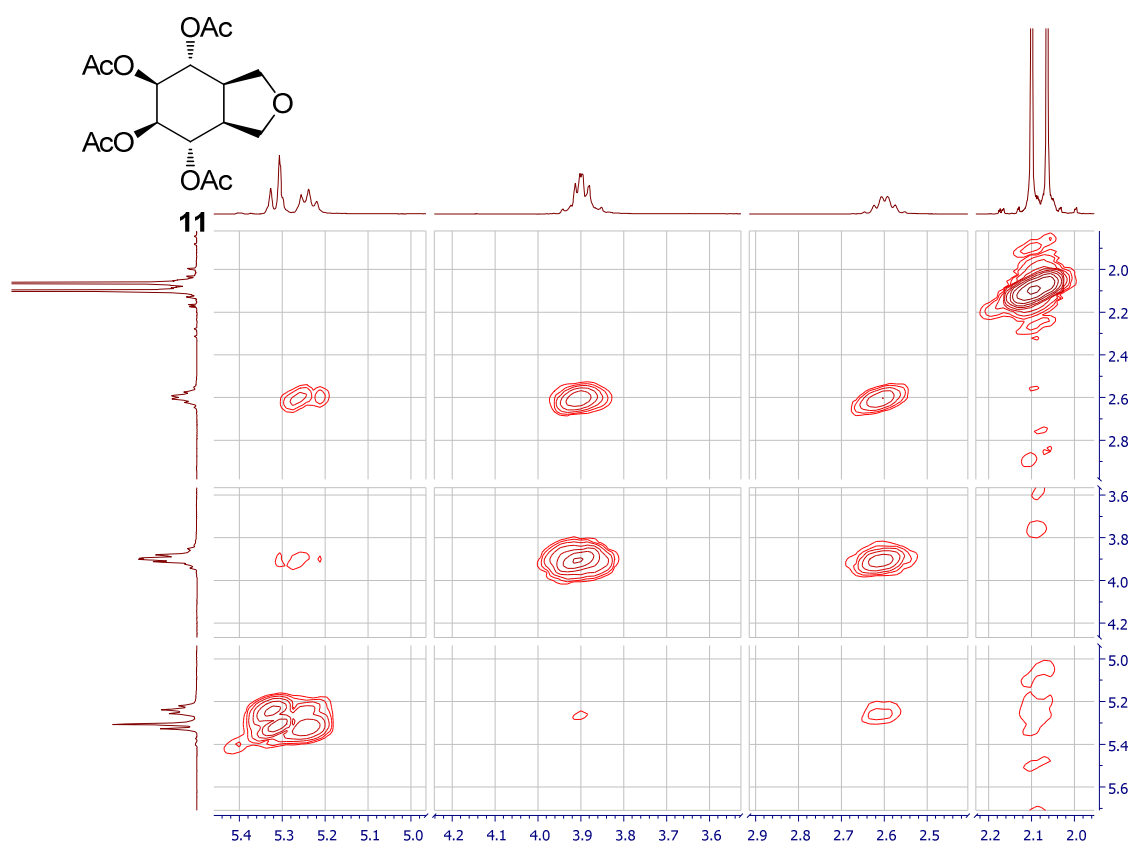

## HETCOR spectrum

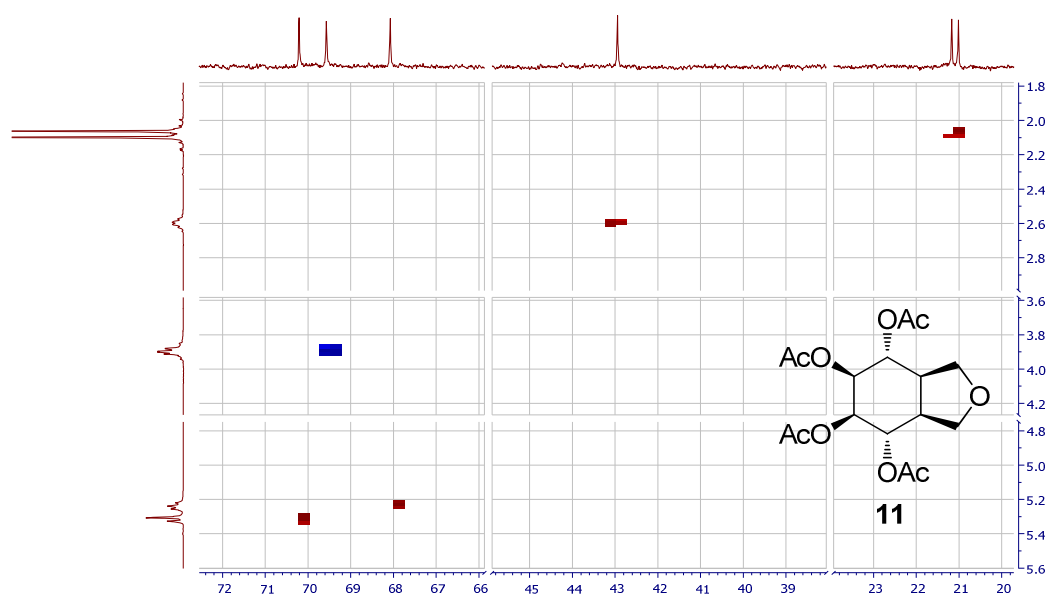

**$^1\text{H}$  NMR in  $\text{CDCl}_3$**

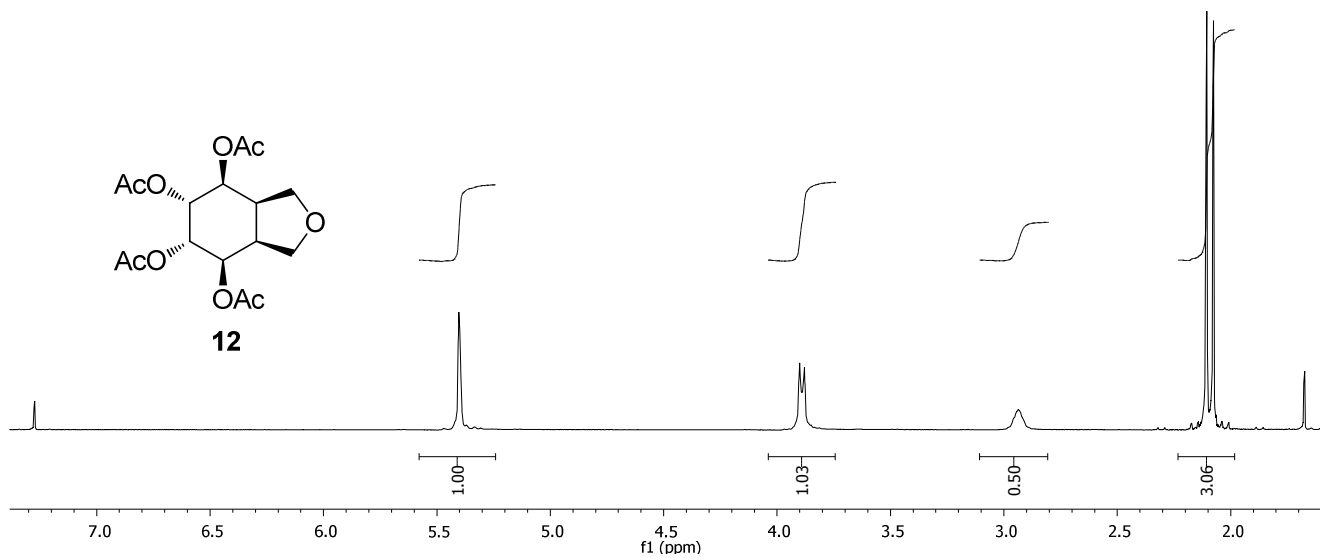

**$^{13}\text{C}$  NMR spectrum**

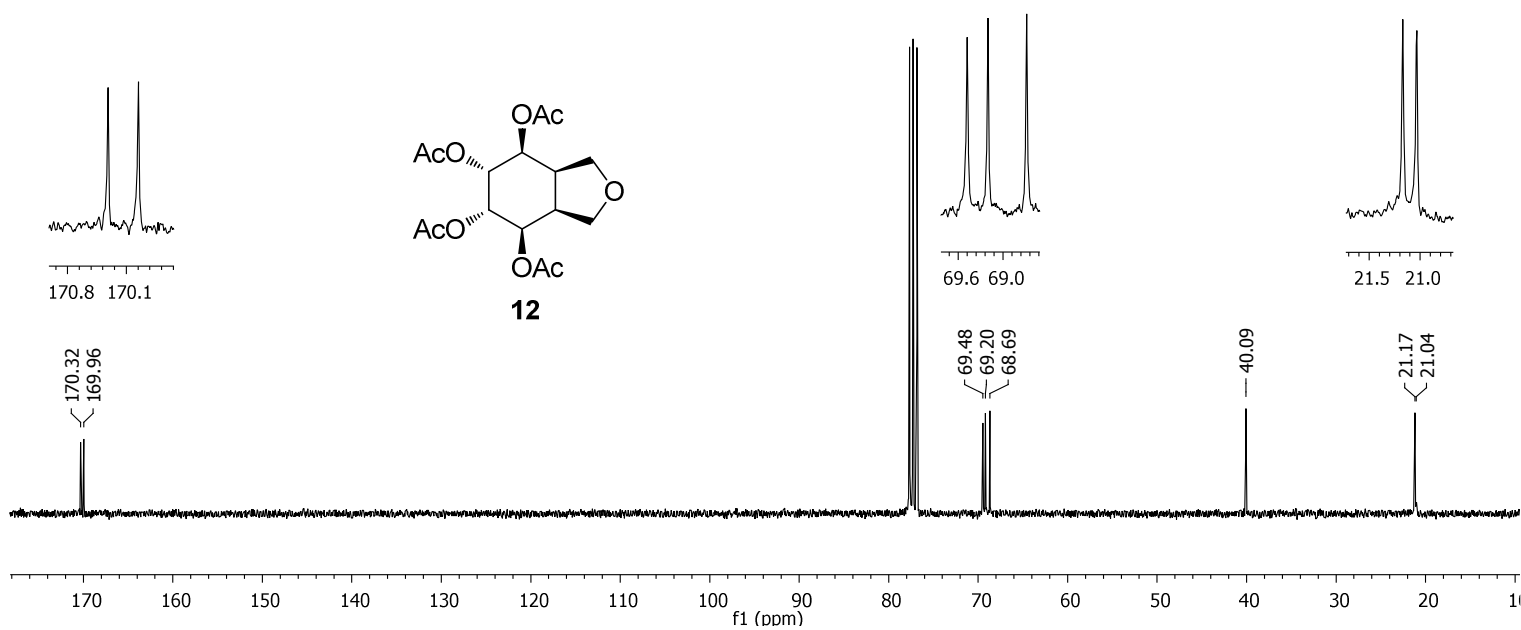

# DEPT spectrum

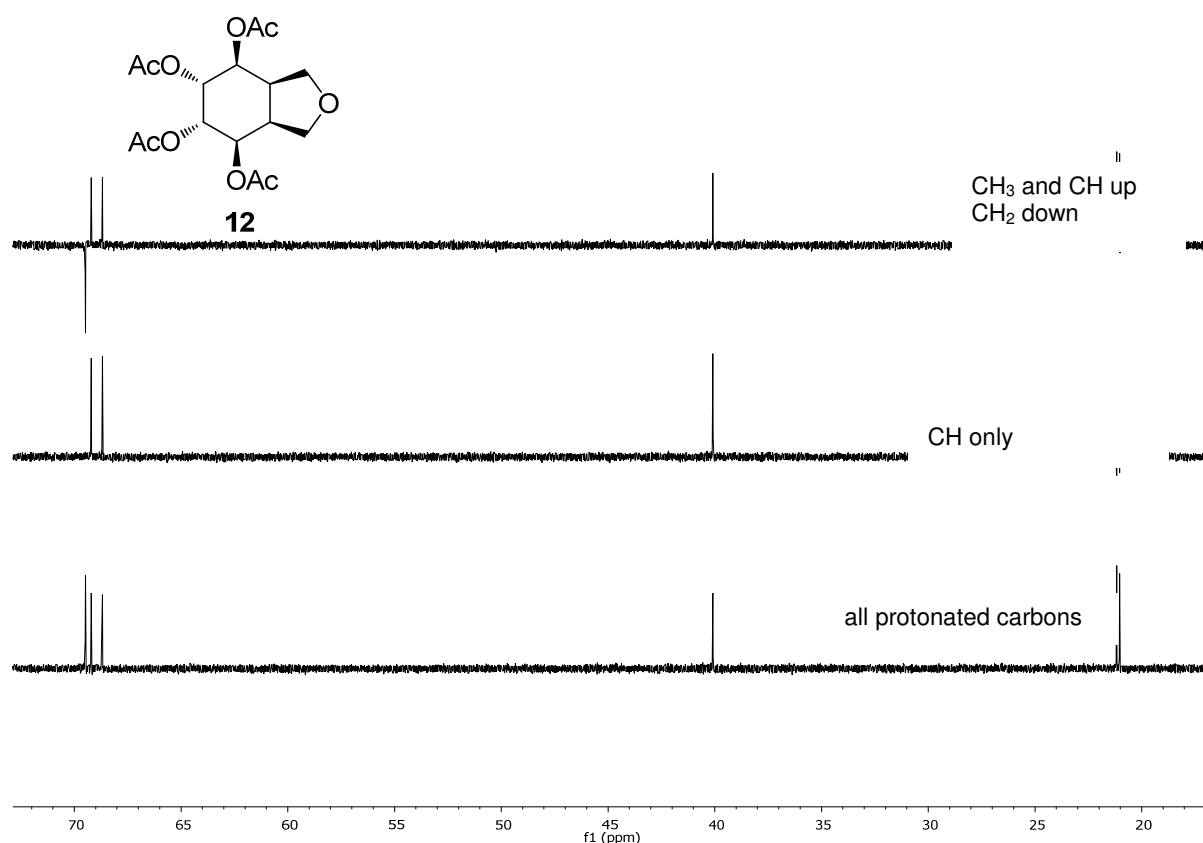

# COSY spectrum

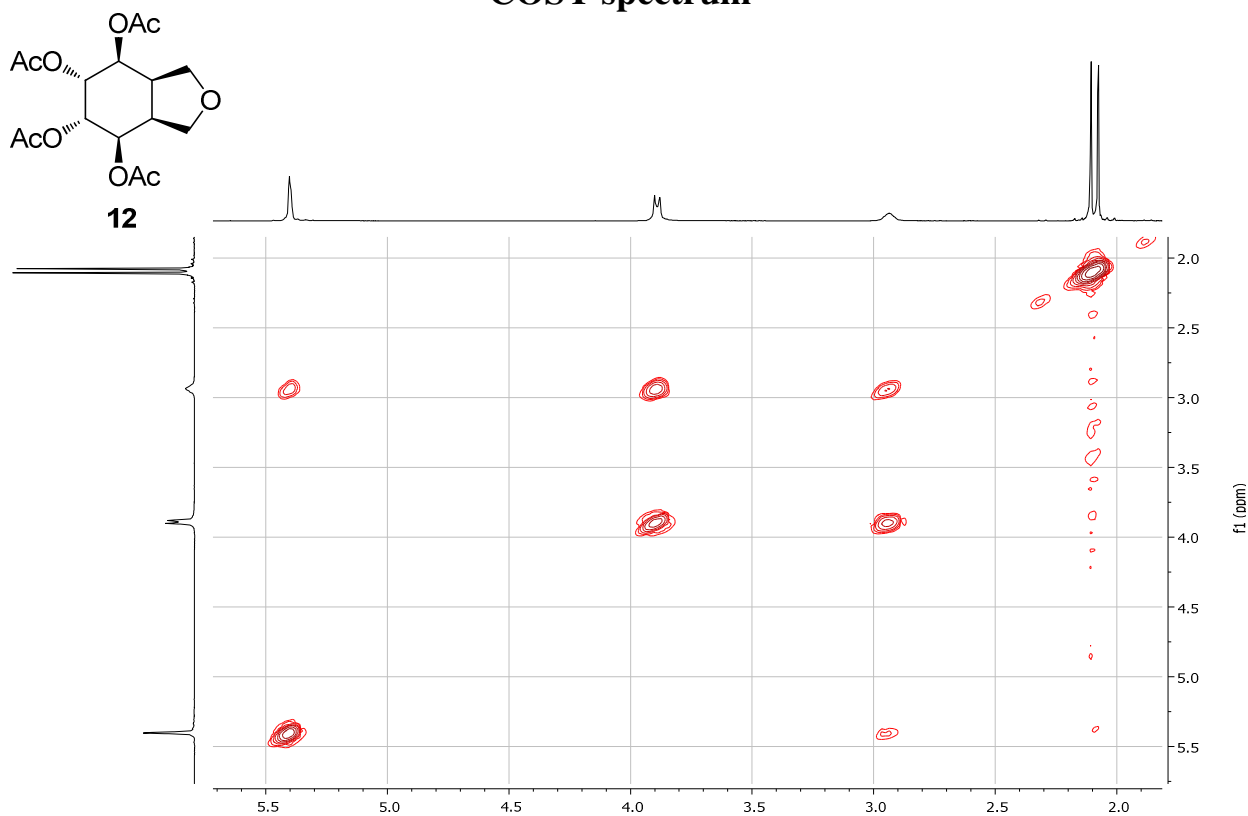

# HETCOR spectrum

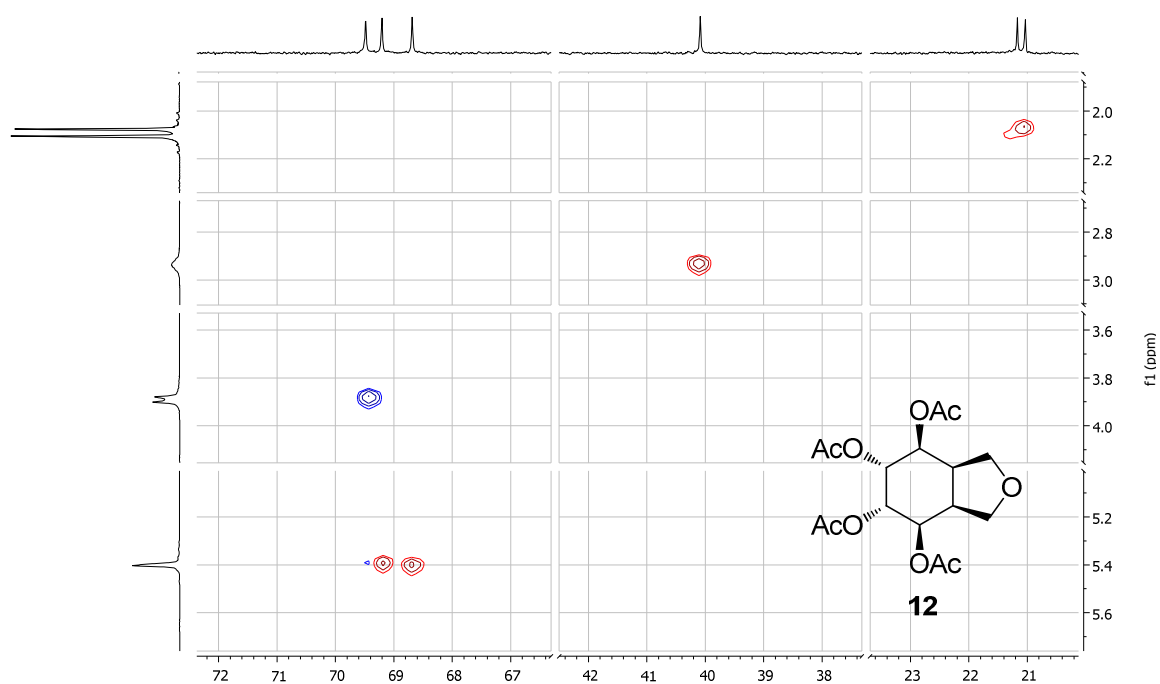

<sup>1</sup>H NMR in CDCl<sub>3</sub>

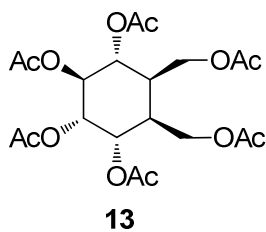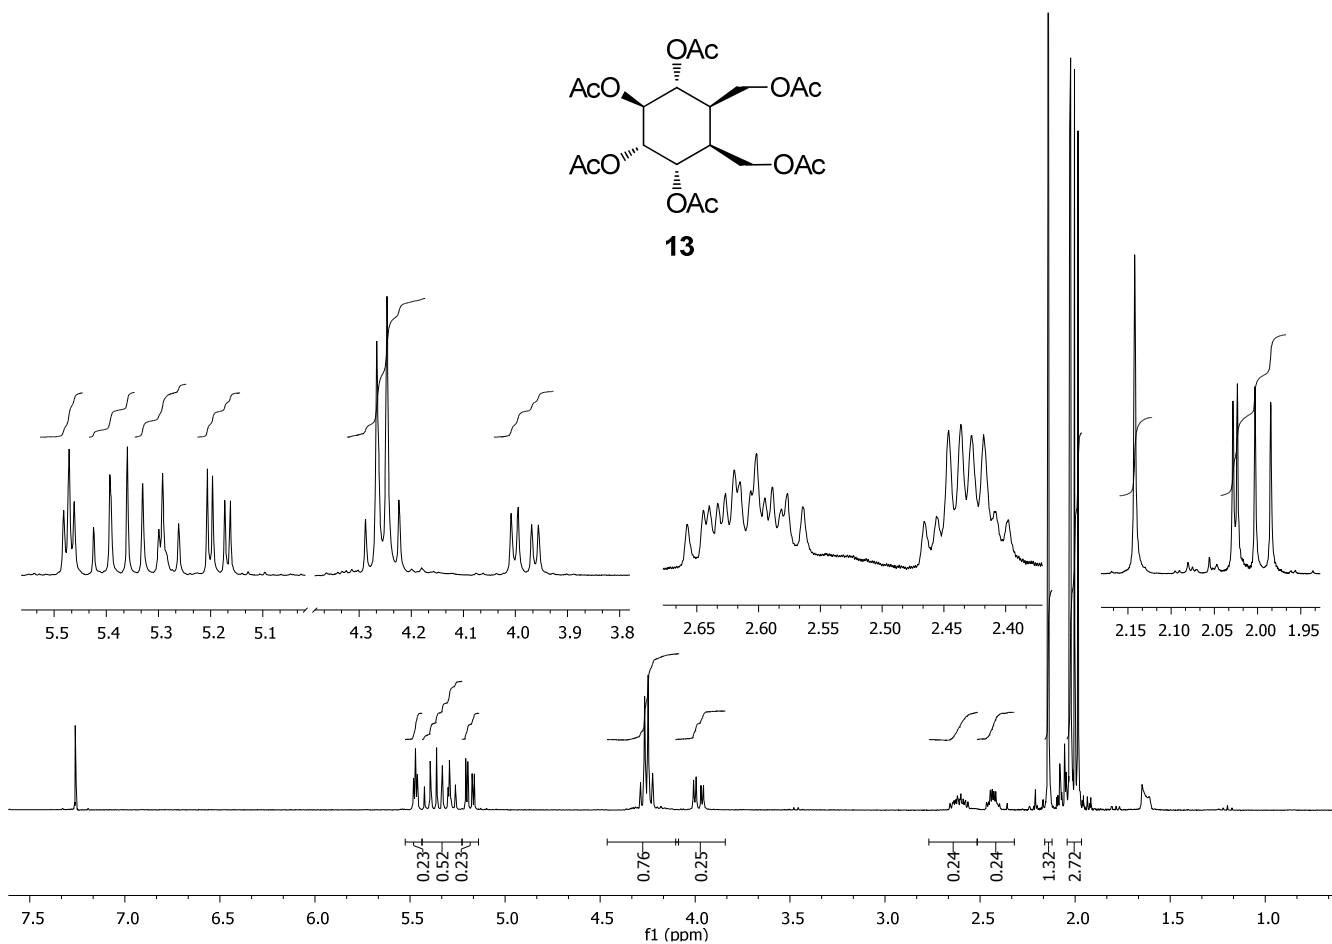

<sup>13</sup>C NMR spectrum

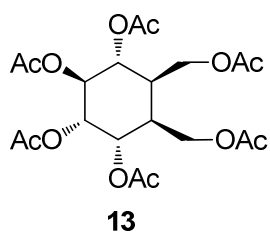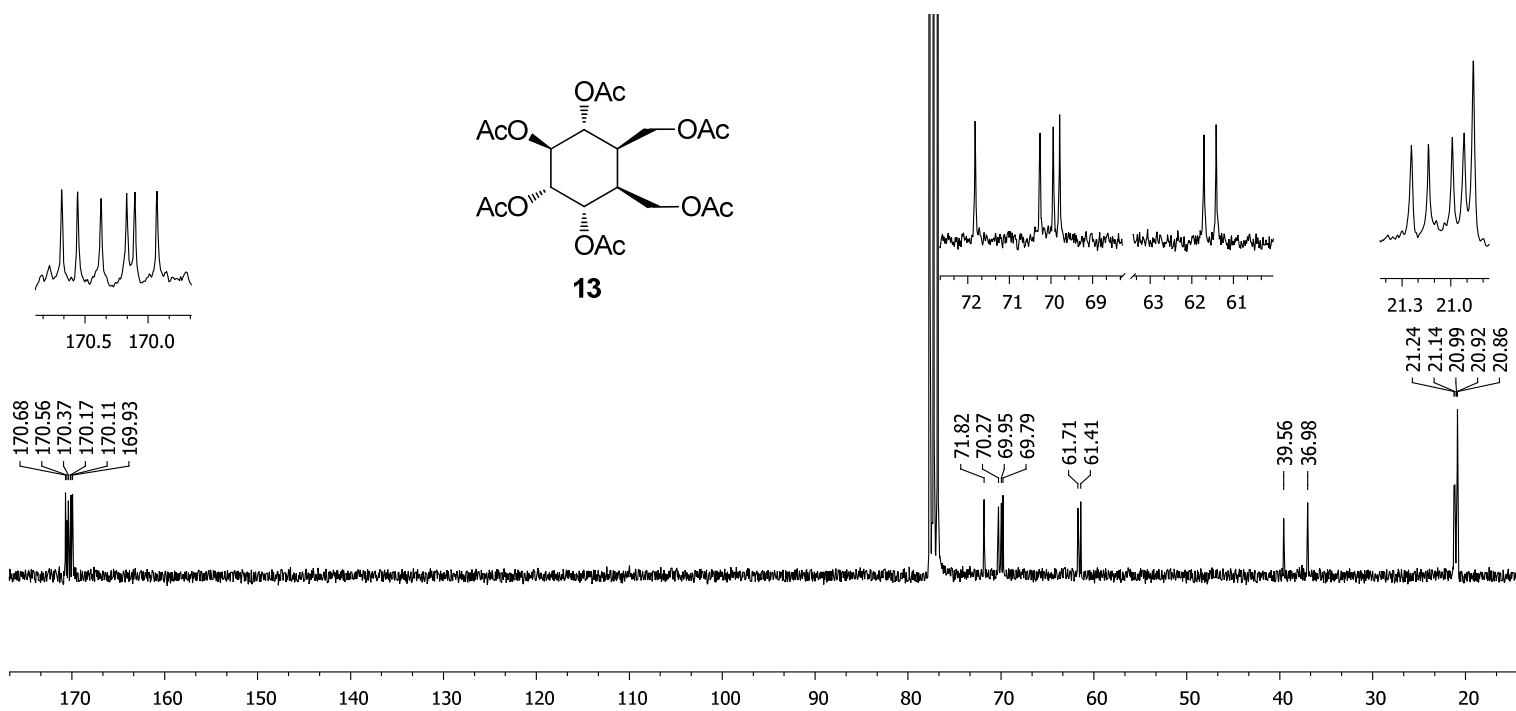

# DEPT spectrum

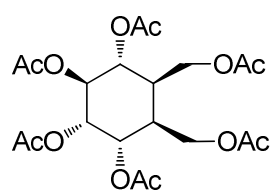

13

CH<sub>3</sub> and CH up  
CH<sub>2</sub> down

CH only

all protonated carbons

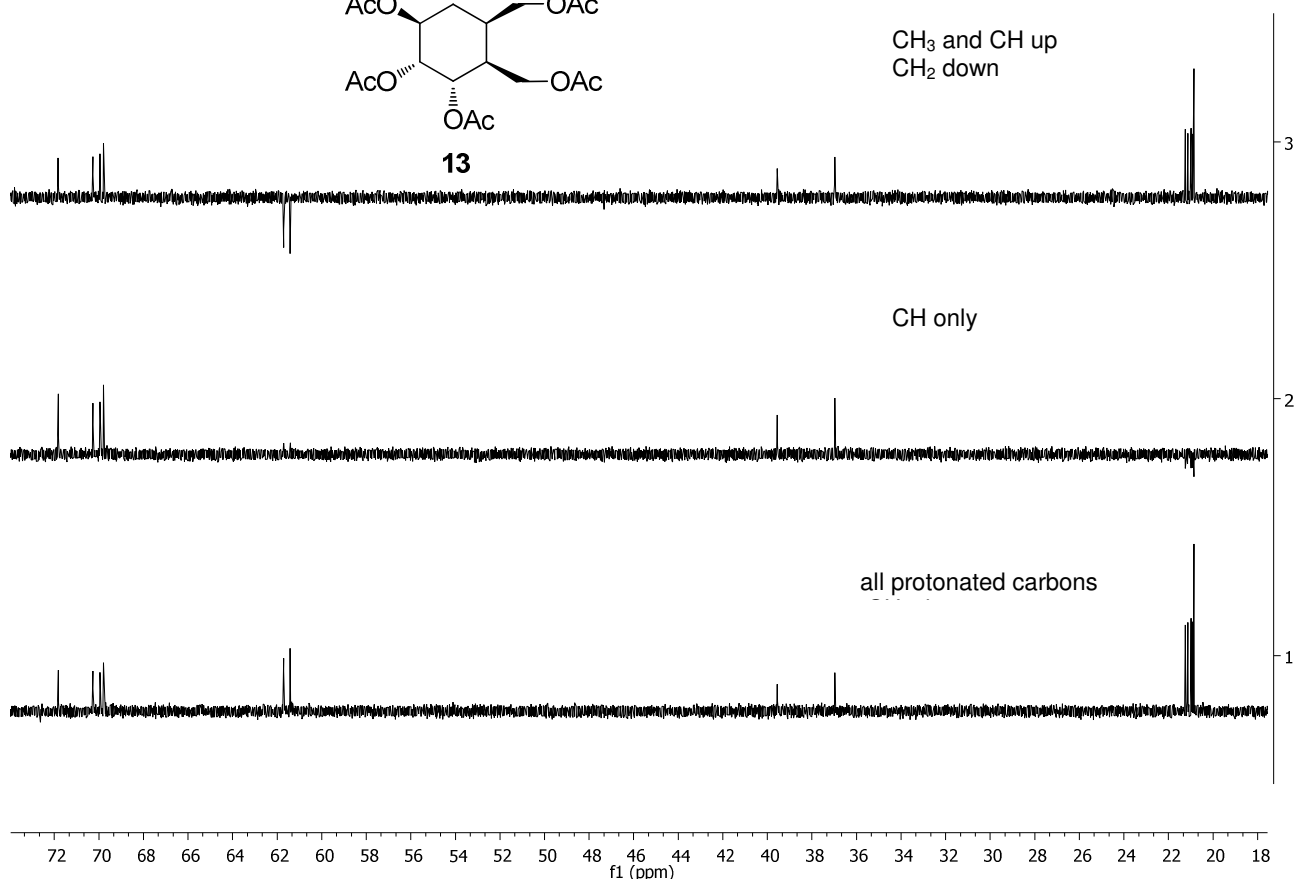

# COSY spectrum

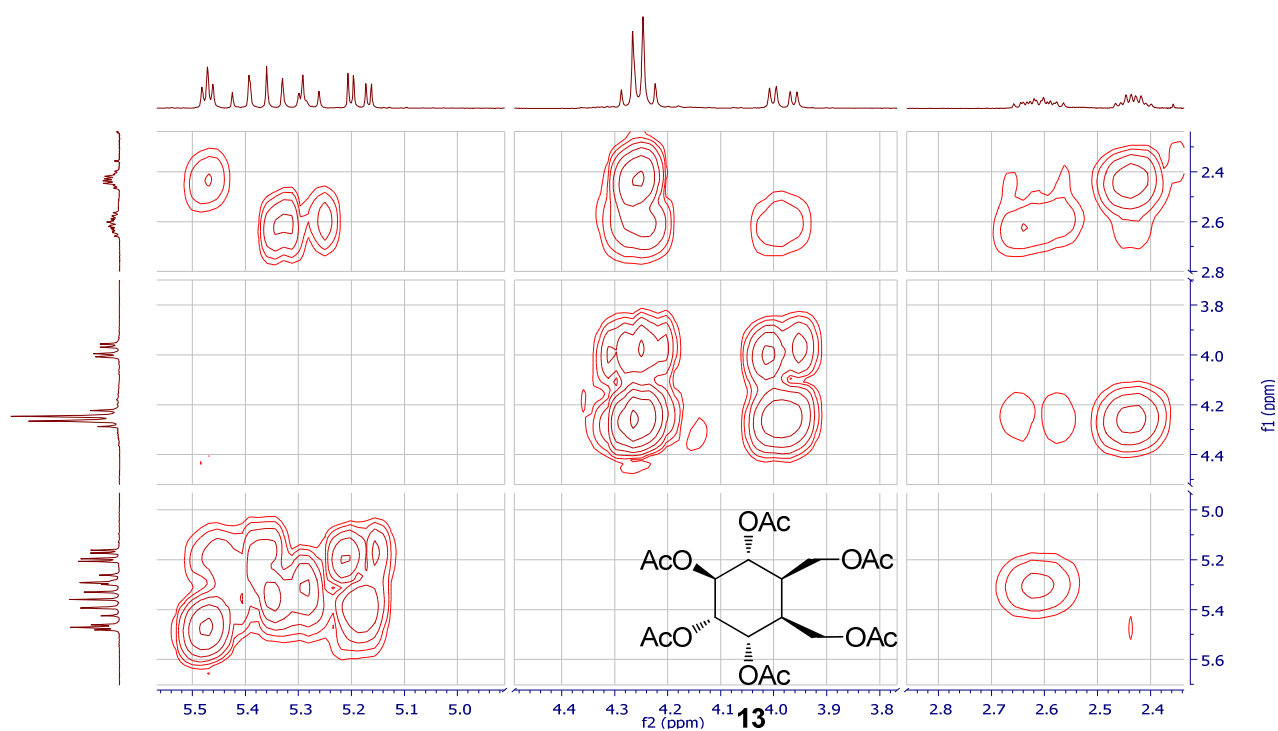

16



# HETCOR spectrum

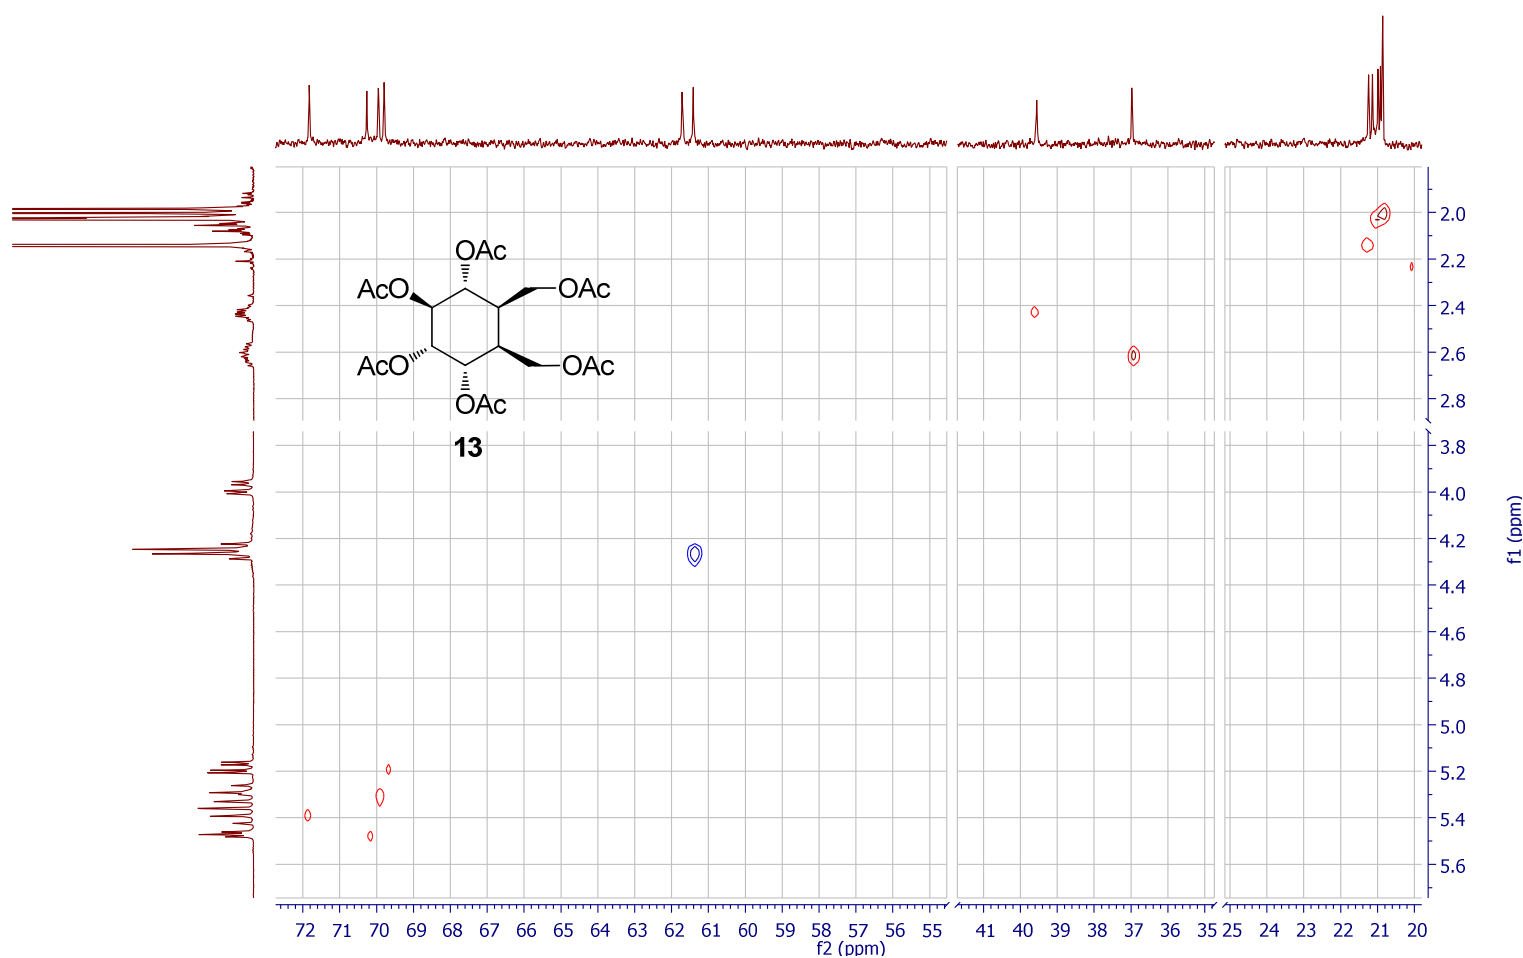

# $^1\text{H}$ NMR in DMSO- $\text{d}_6$

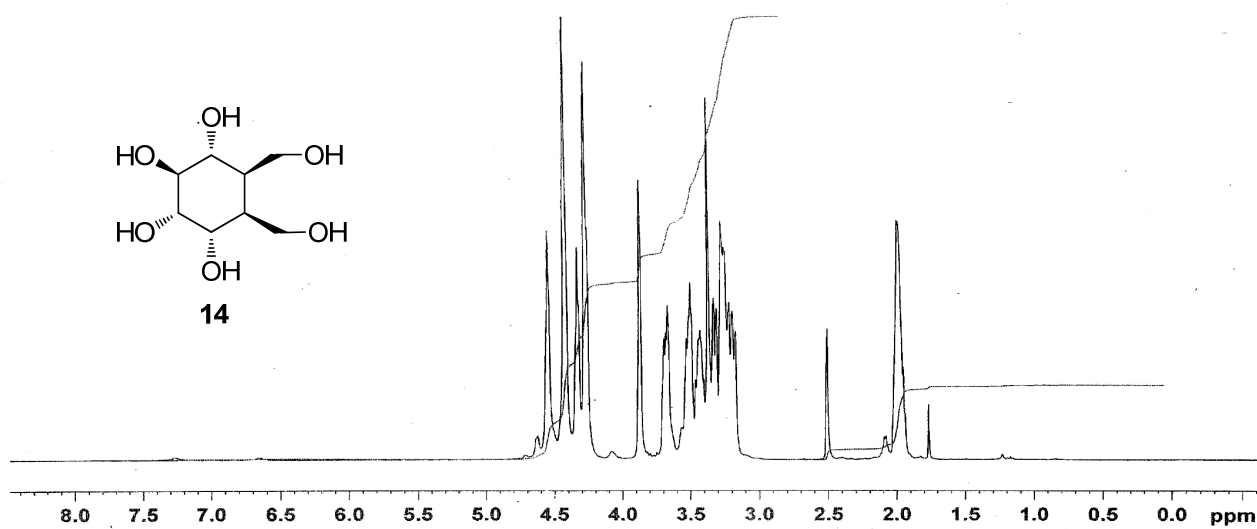

# <sup>1</sup>H NMR spectrum (expanded)

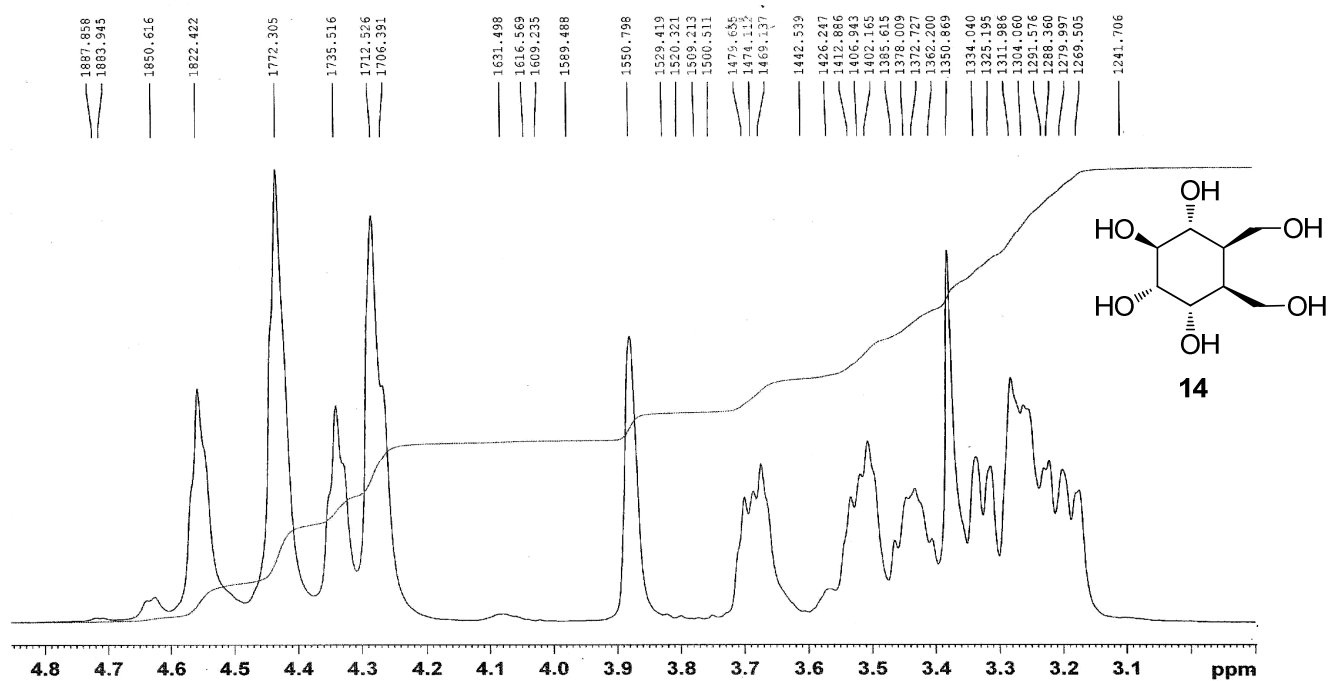

## <sup>13</sup>C NMR in DMSO-d<sub>6</sub>

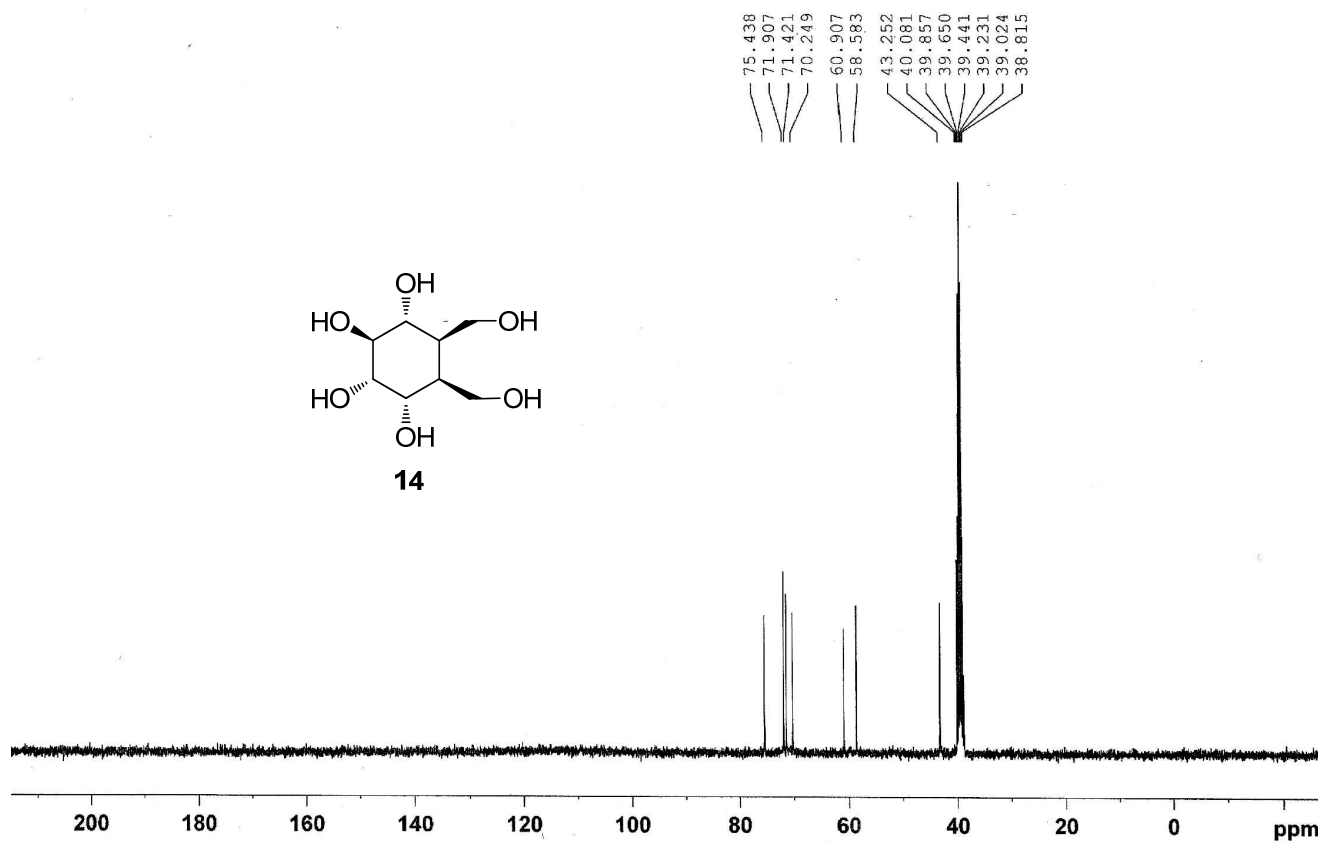

# <sup>13</sup>C NMR spectrum (expanded)

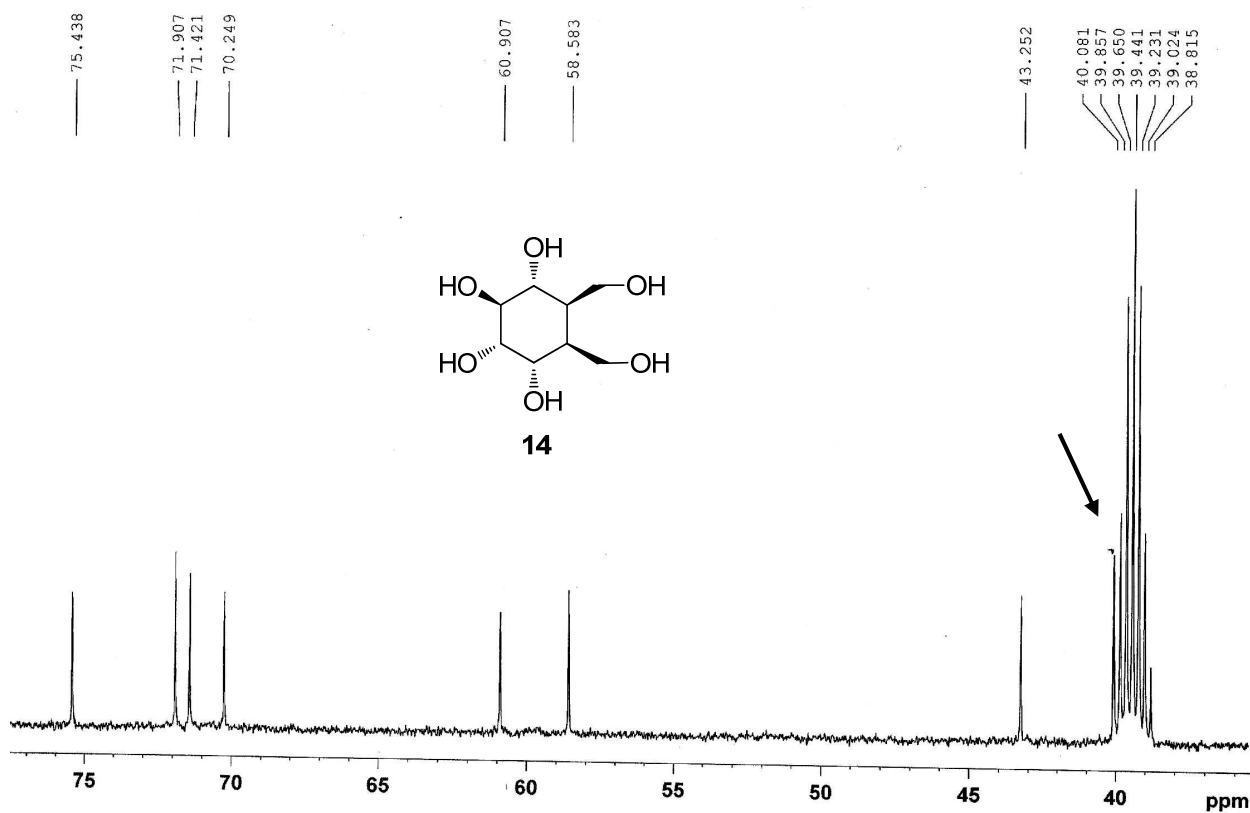

# <sup>1</sup>H NMR spectrum

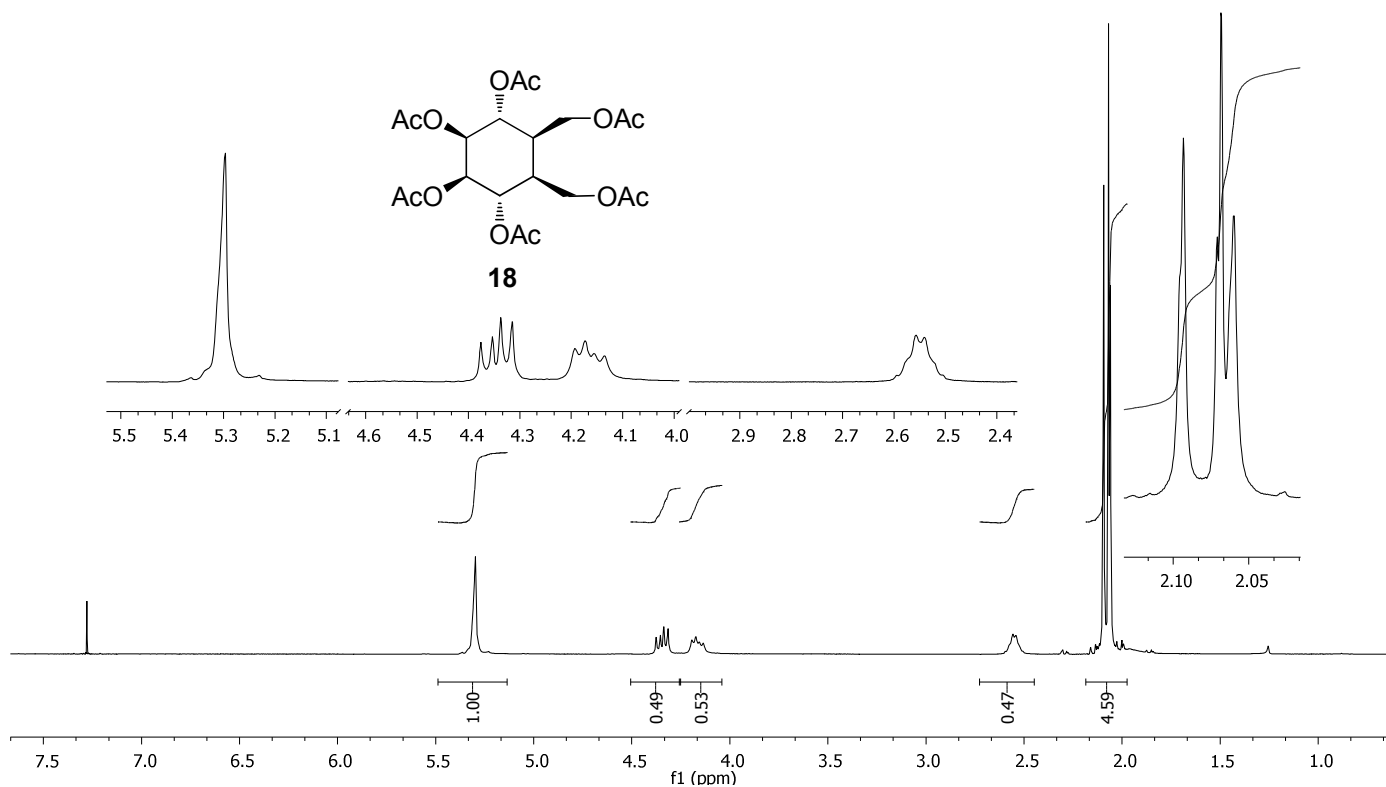

# <sup>13</sup>C NMR spectrum

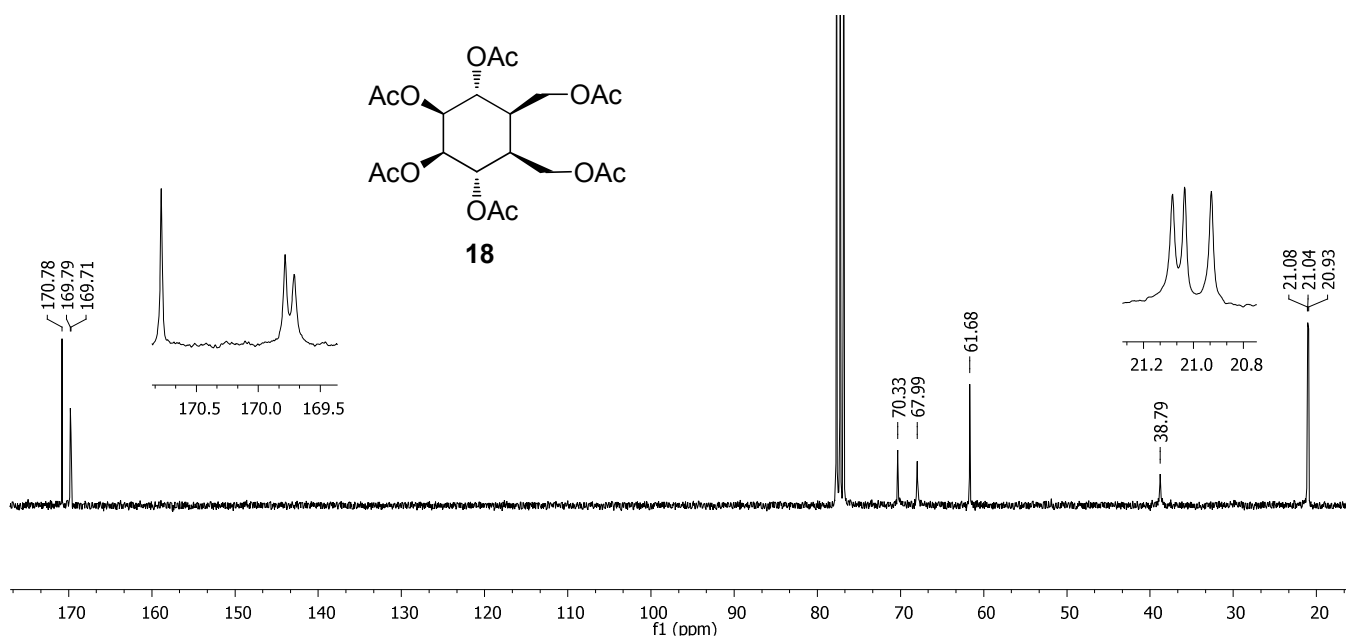

# COSY spectrum

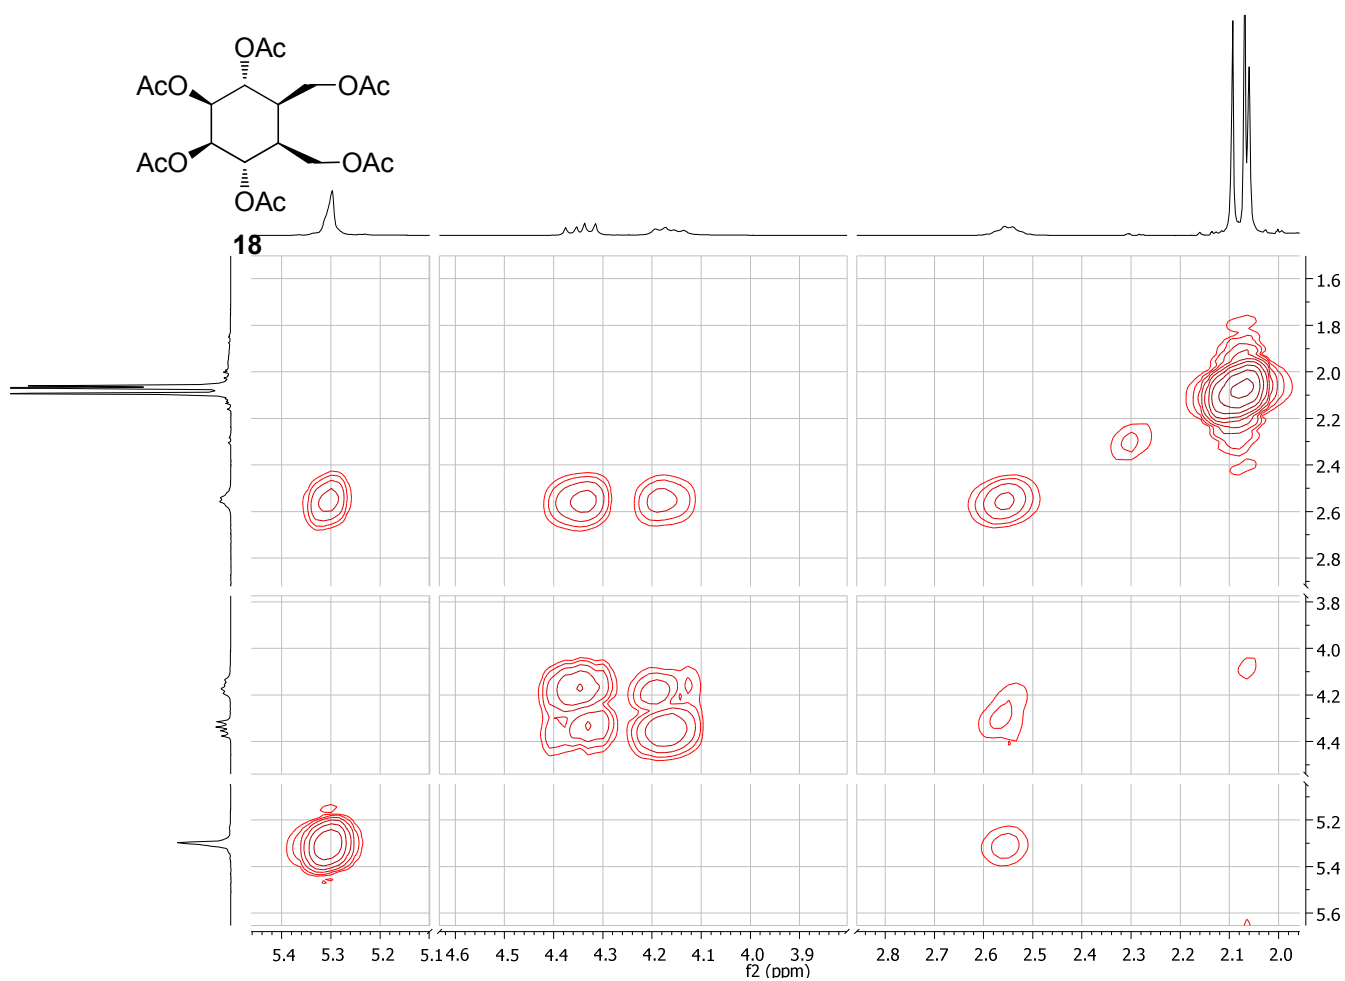

# HETCOR spectrum

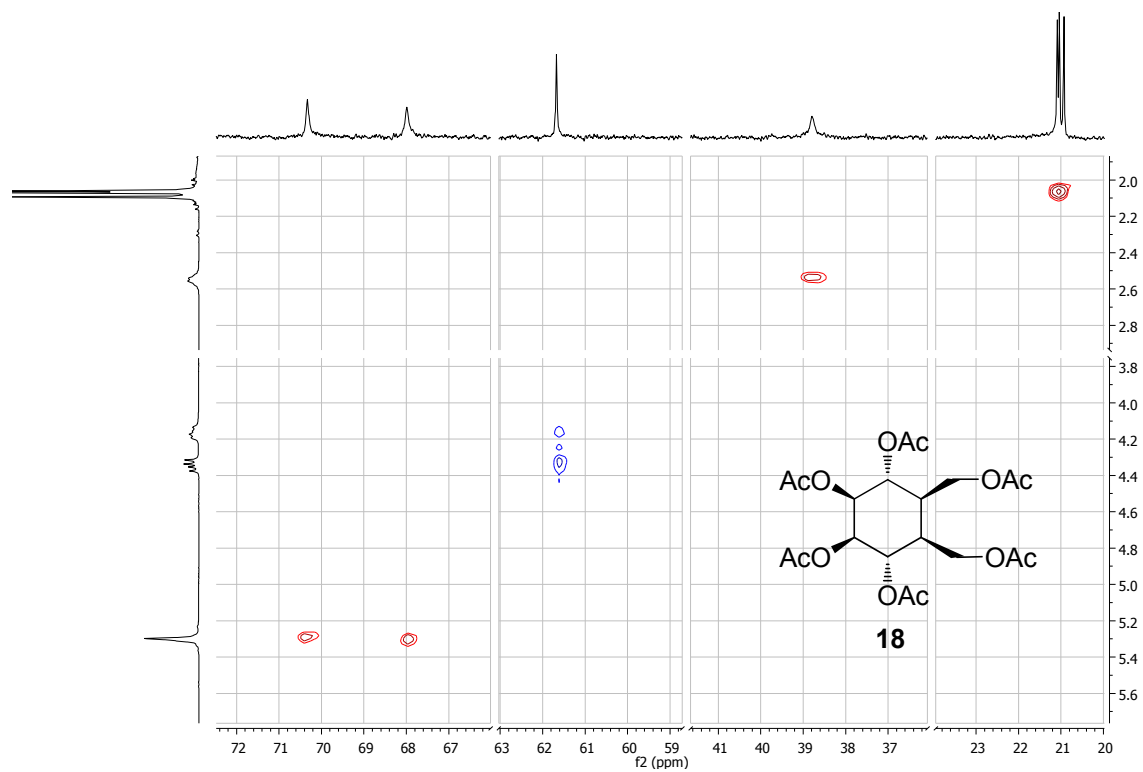

# <sup>1</sup>H NMR in CD<sub>3</sub>OD

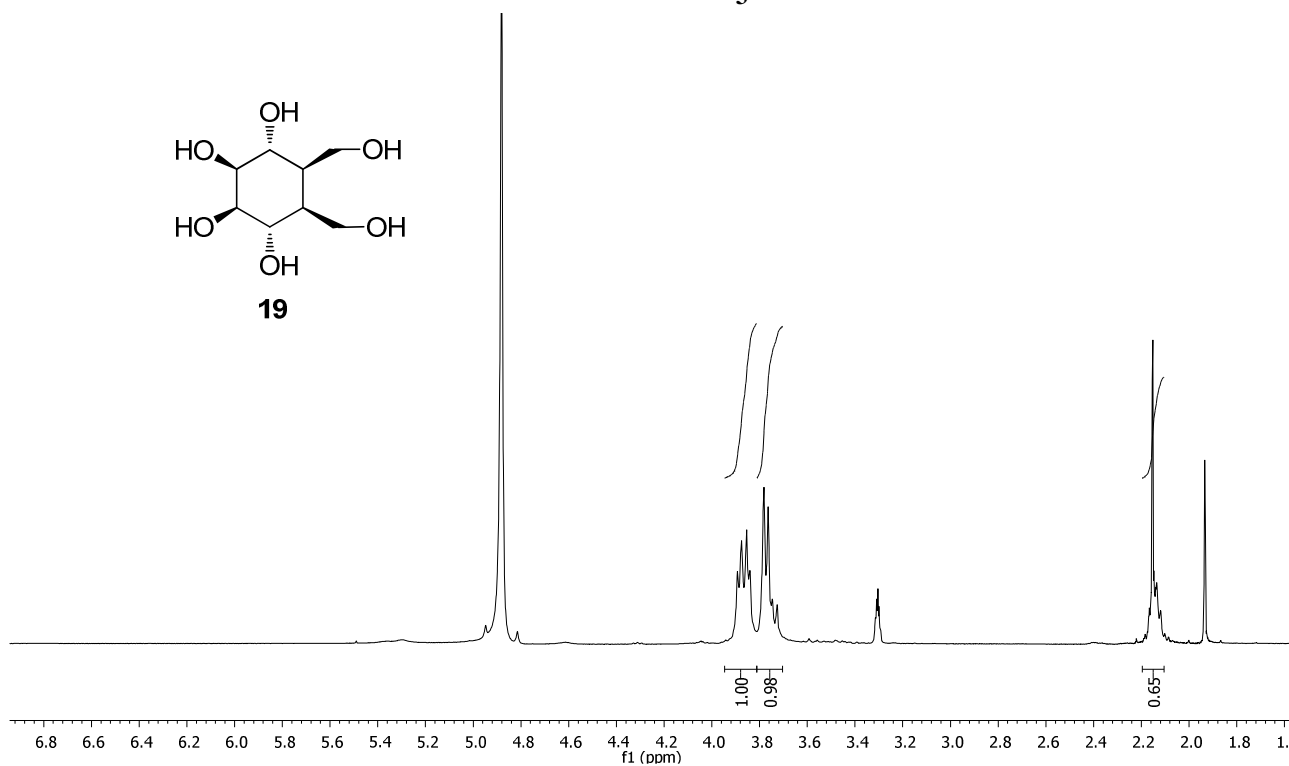

**$^{13}\text{C}$  NMR in  $\text{CD}_3\text{OD}$**

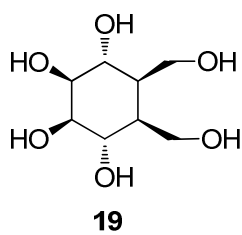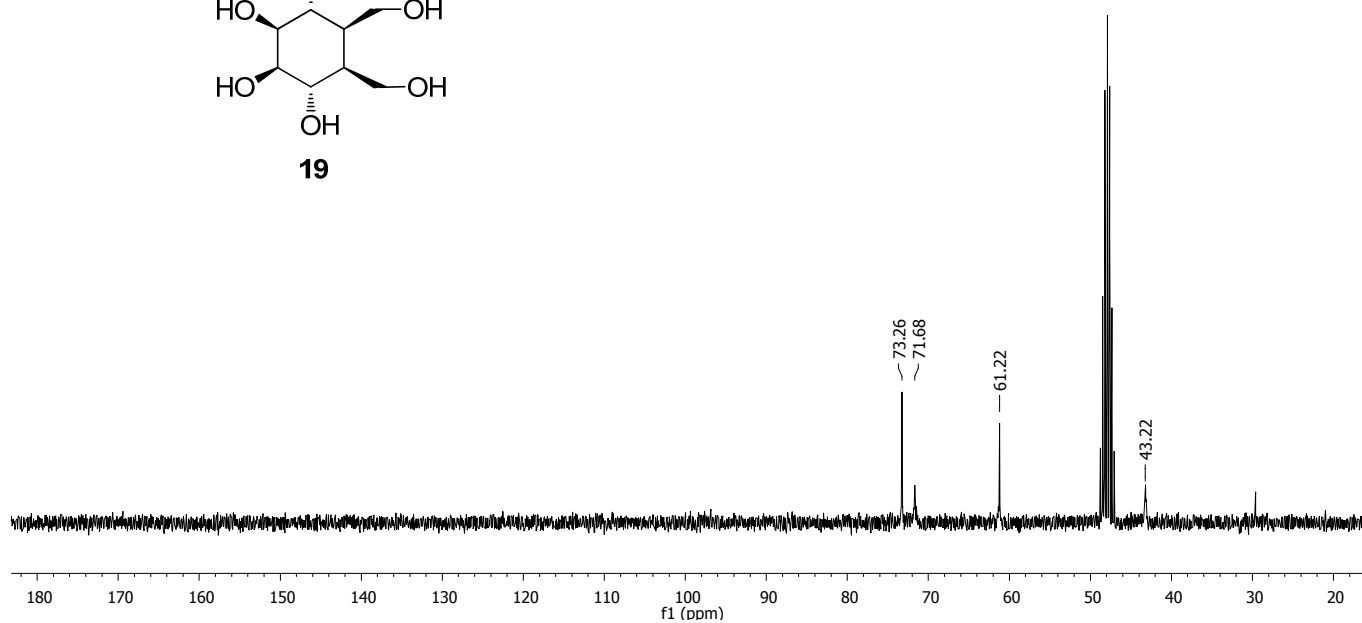

**$^1\text{H}$  NMR spectrum in  $\text{CDCl}_3$**

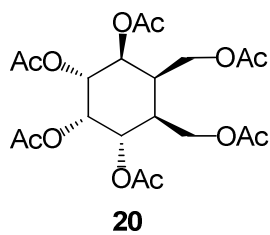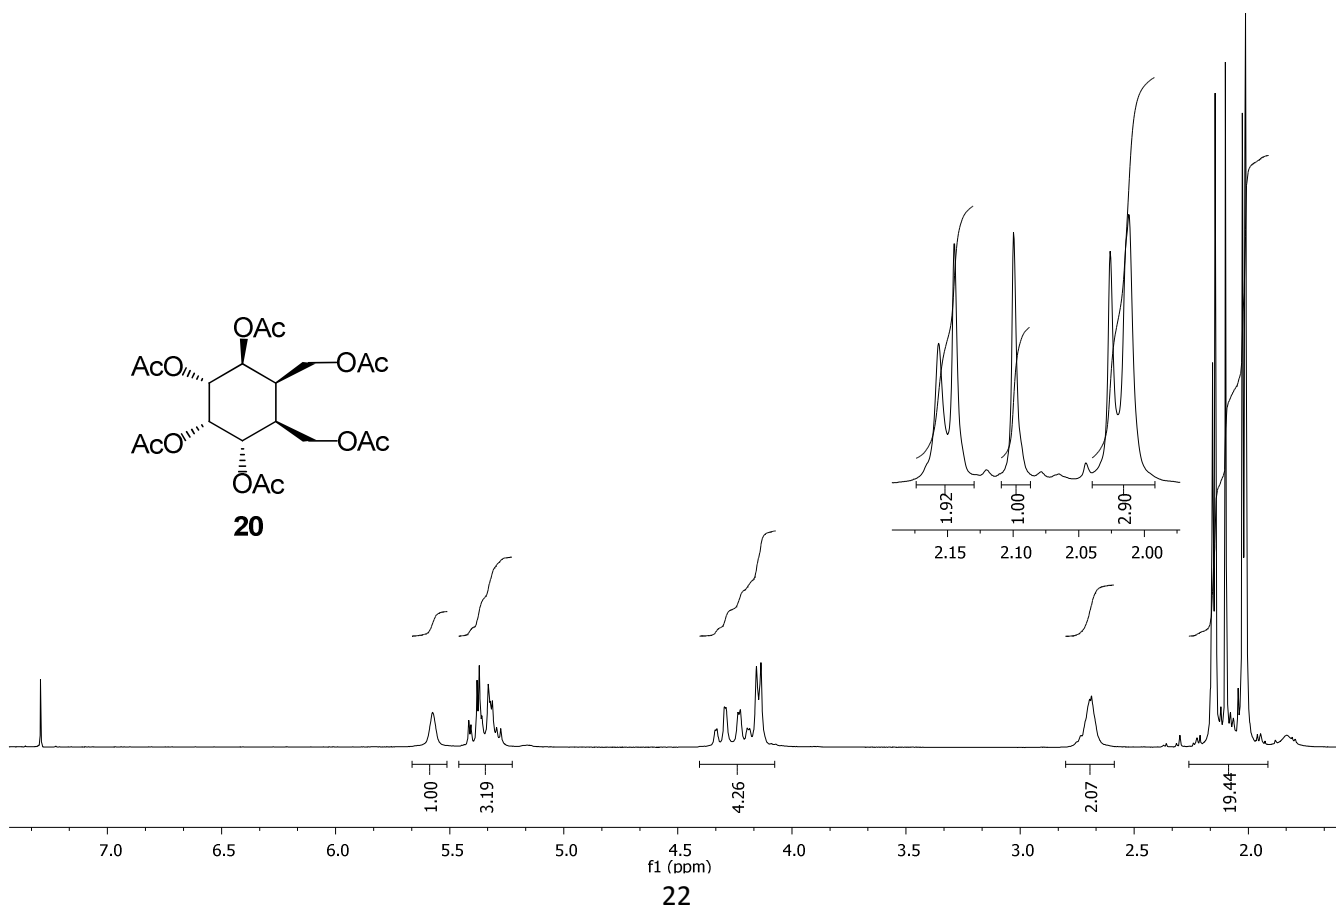

# <sup>13</sup>C NMR spectrum

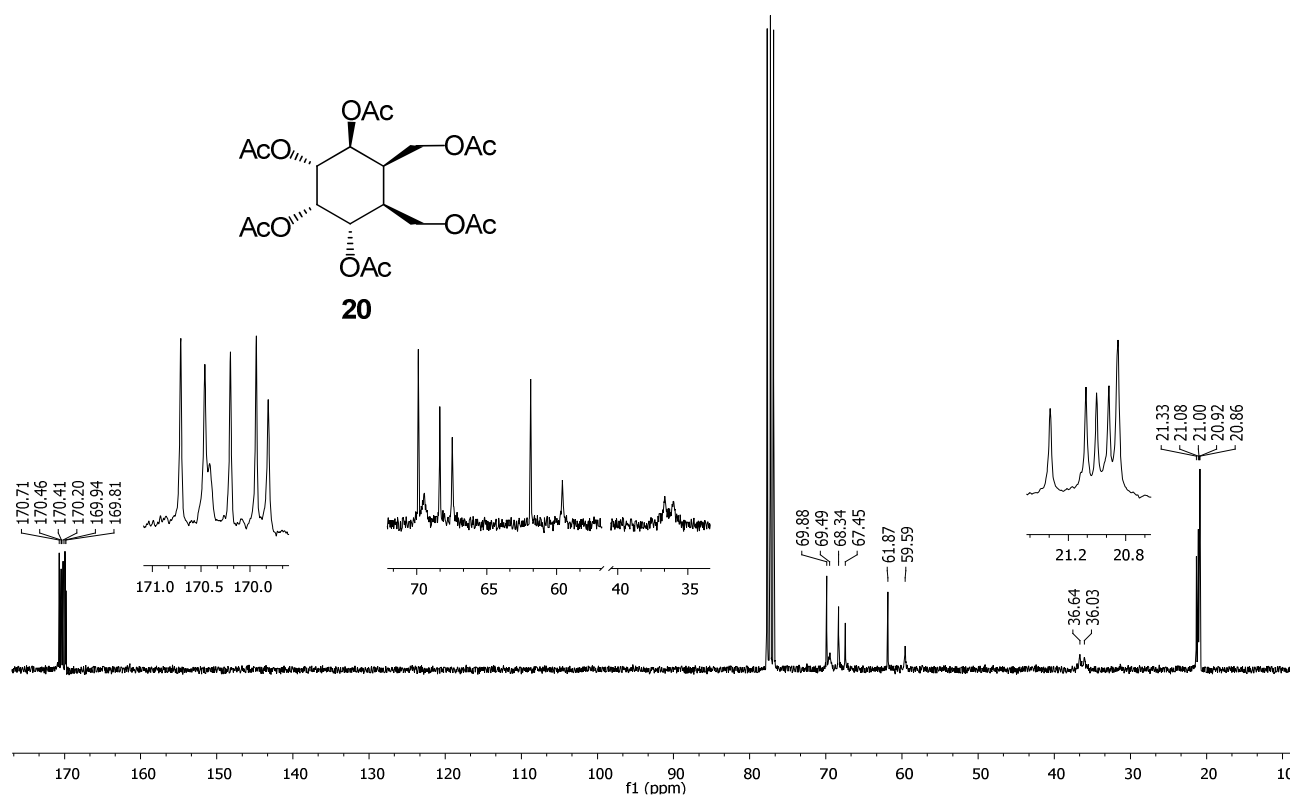

# COSY spectrum

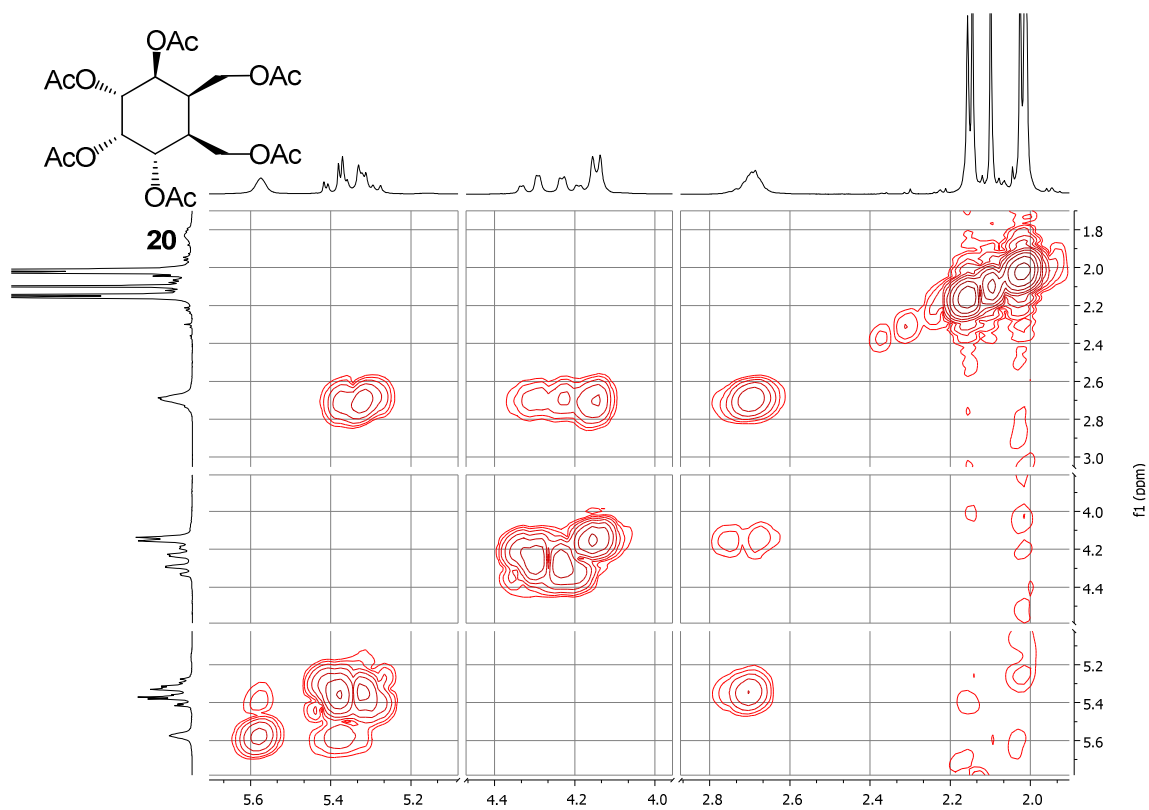

# HETCOR spectrum

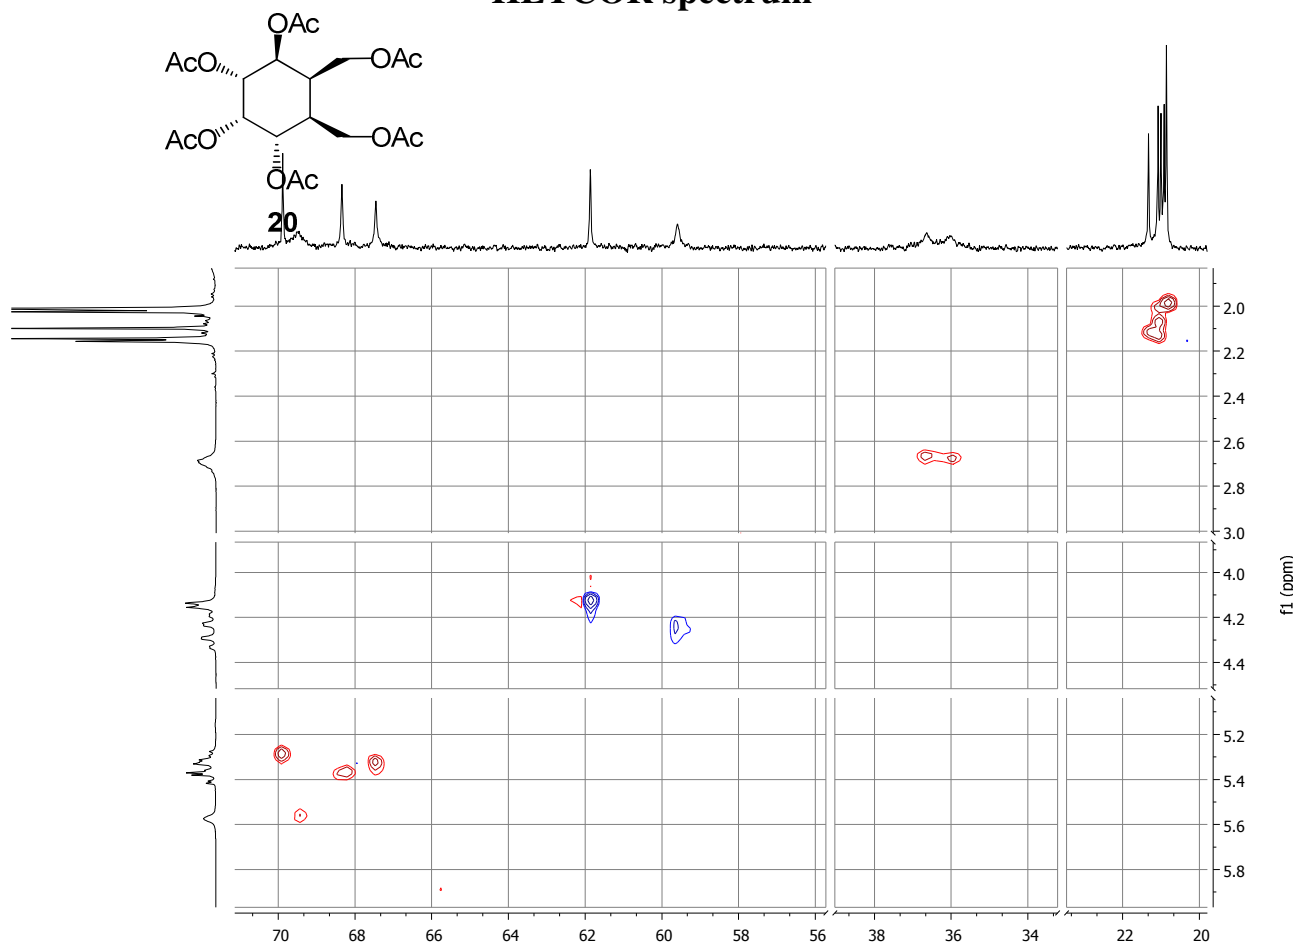

# $^1\text{H}$ NMR spectrum in $\text{D}_2\text{O}$

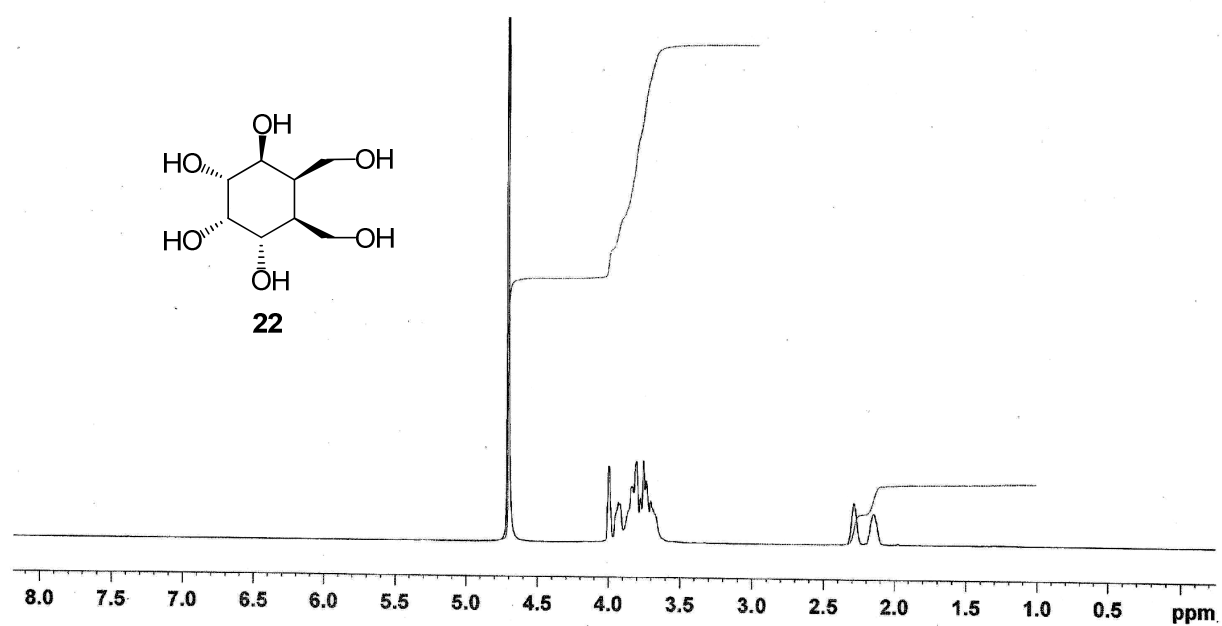



**$^{13}\text{C}$  NMR spectrum at 60  $^{\circ}\text{C}$**

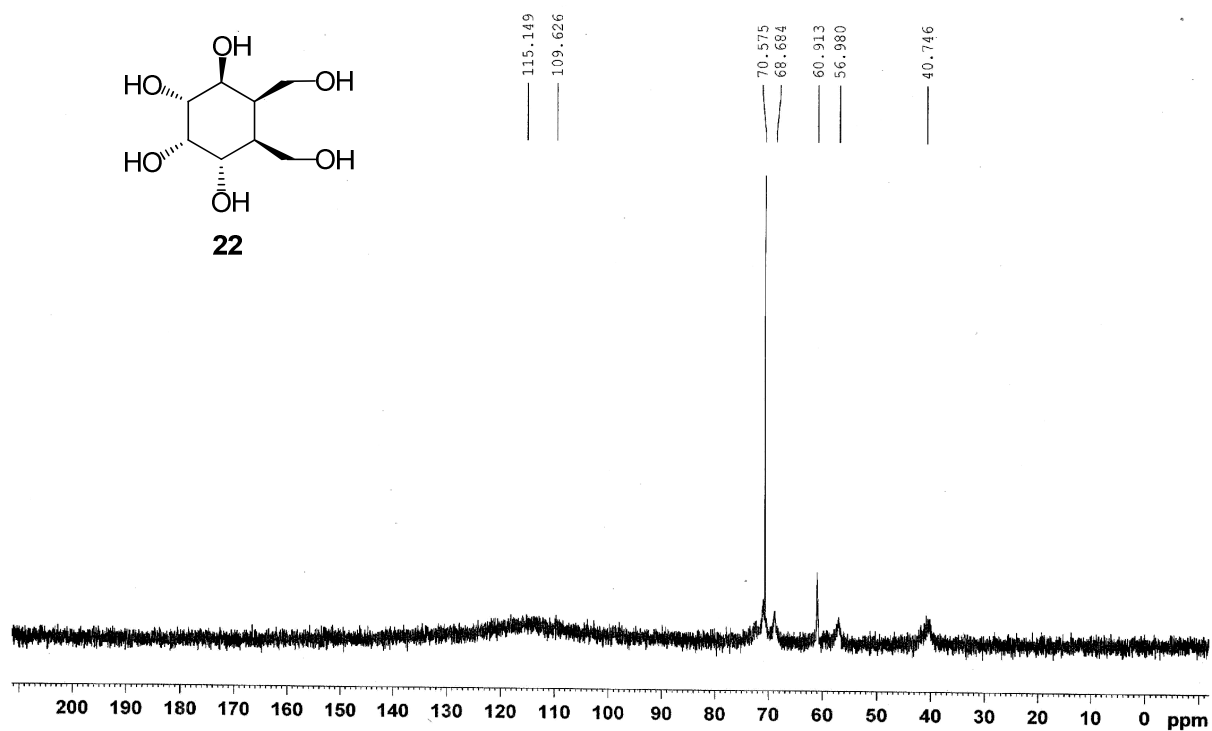

**$^1\text{H}$  NMR in  $\text{CDCl}_3$**

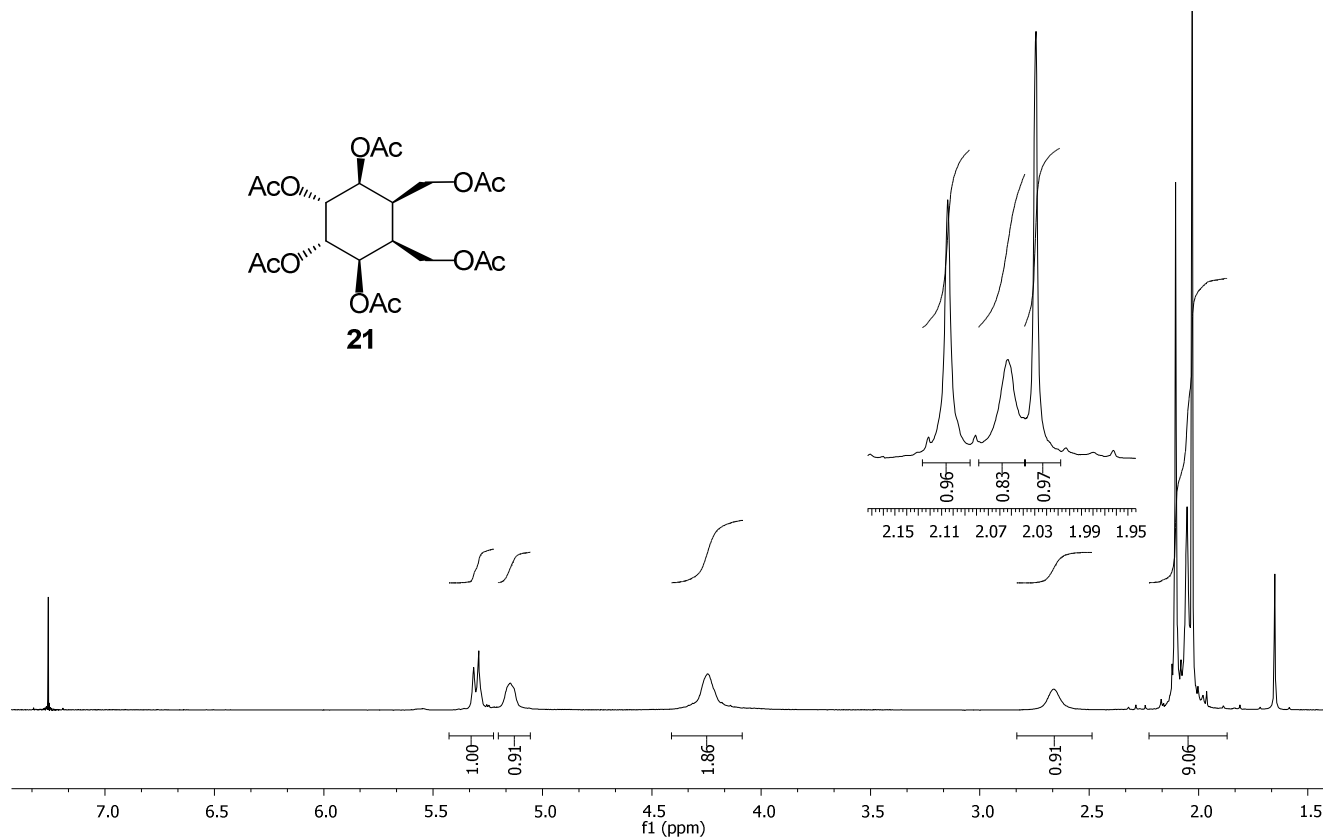

# $^{13}\text{C}$ NMR spectrum

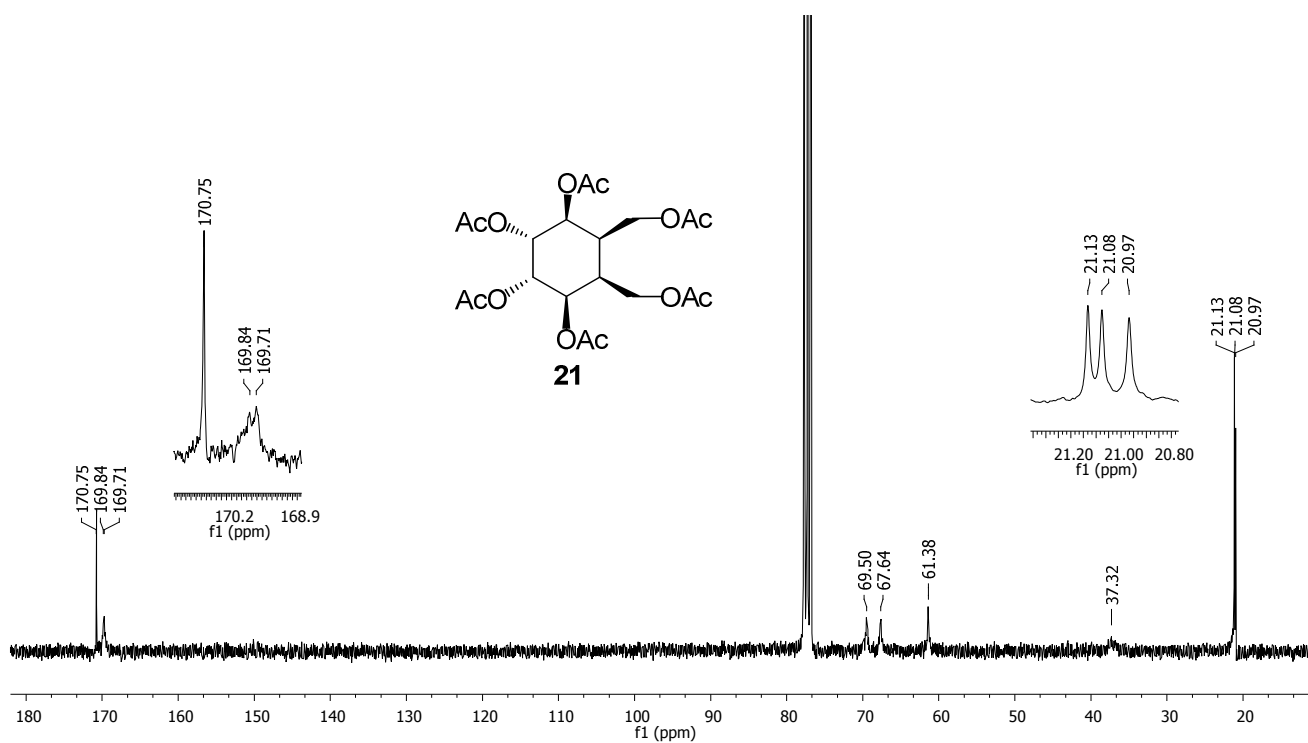

# COSY spectrum

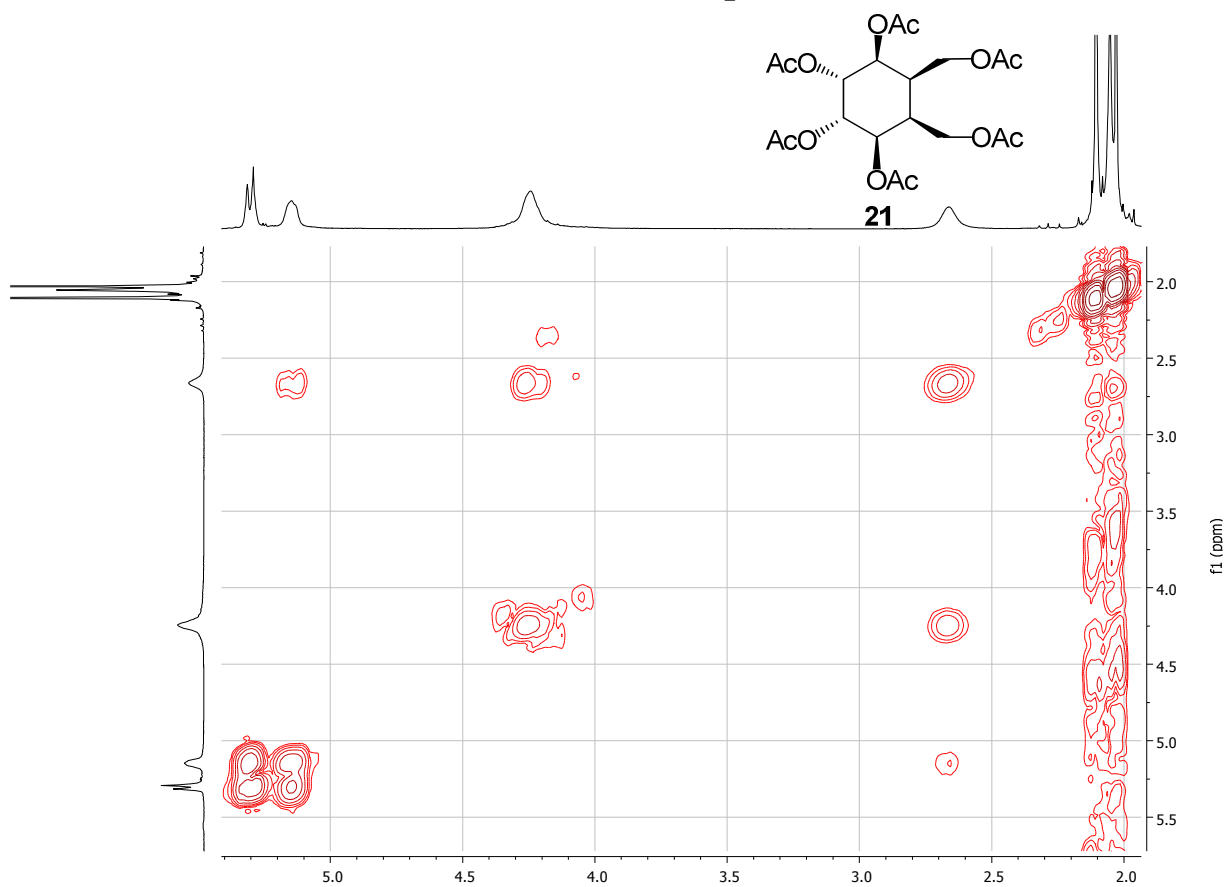

## HETCOR spectrum

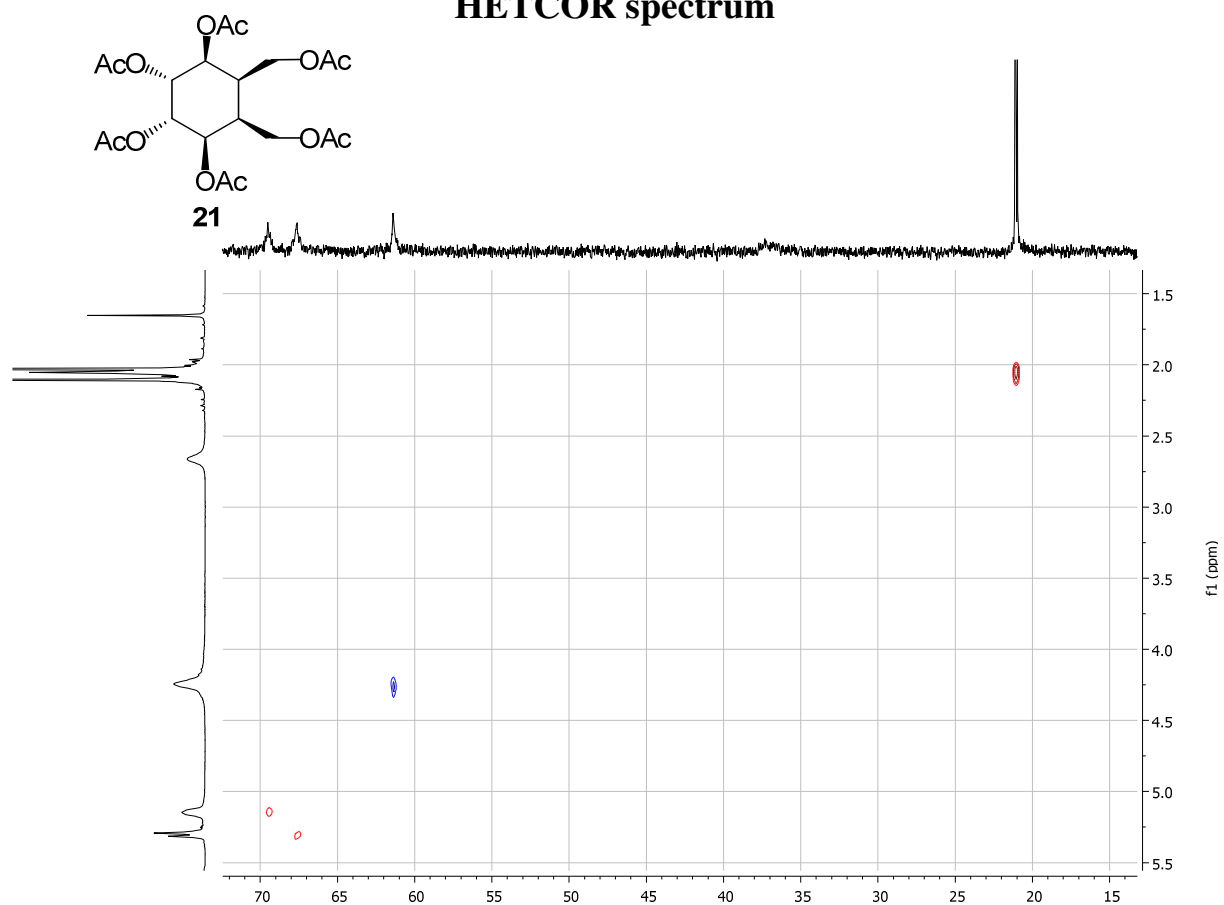

## $^1\text{H}$ NMR in $\text{CD}_3\text{OD}$

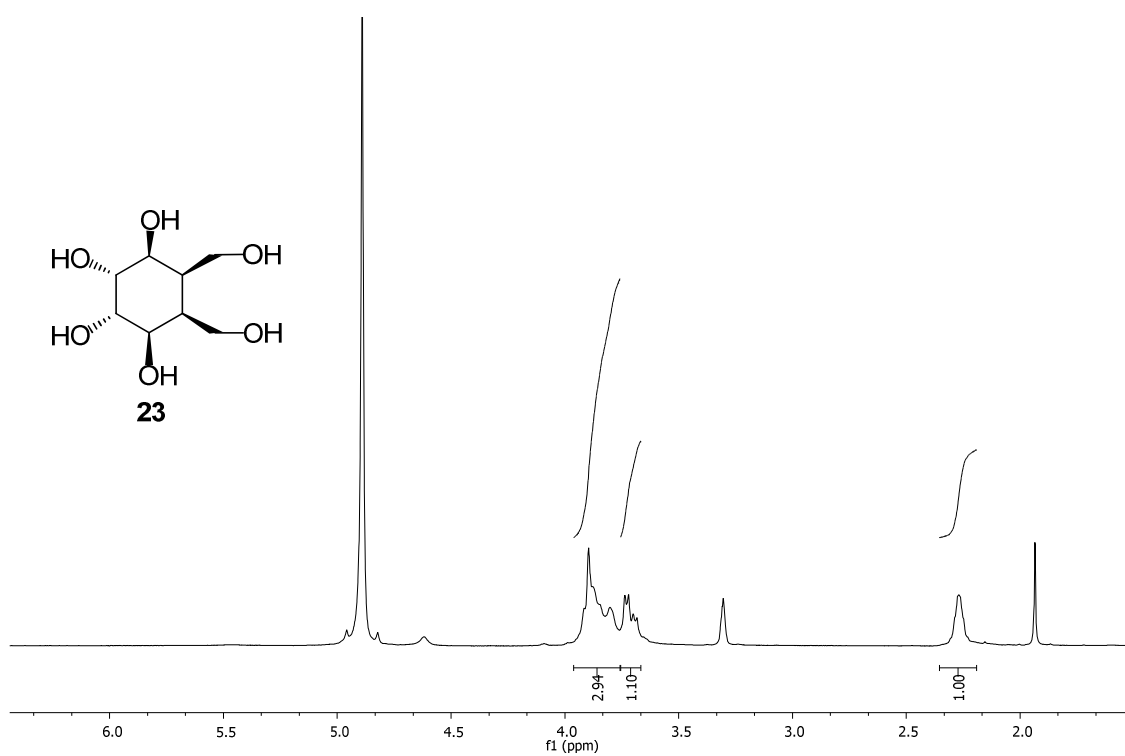

$^{13}\text{C}$  NMR in  $\text{CD}_3\text{OD}$  at  $80^\circ\text{C}$

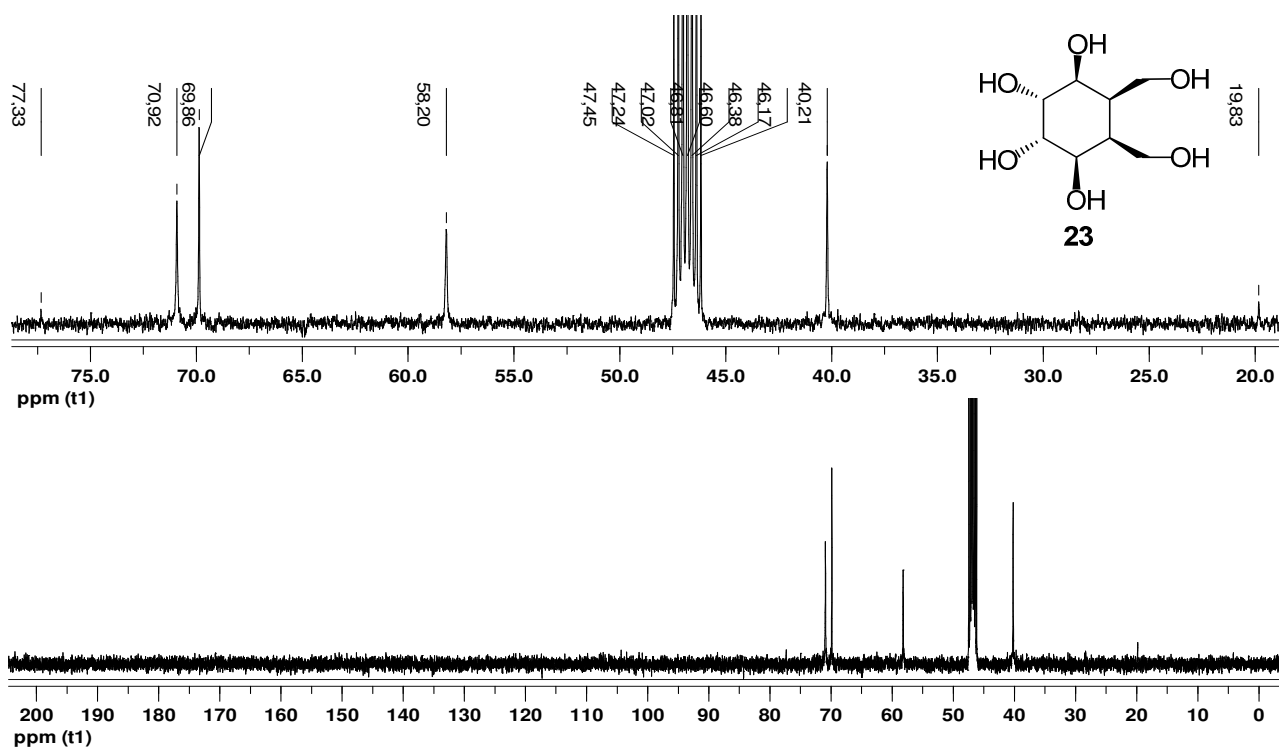

$^1\text{H}$  NMR spectrum in  $\text{CDCl}_3$

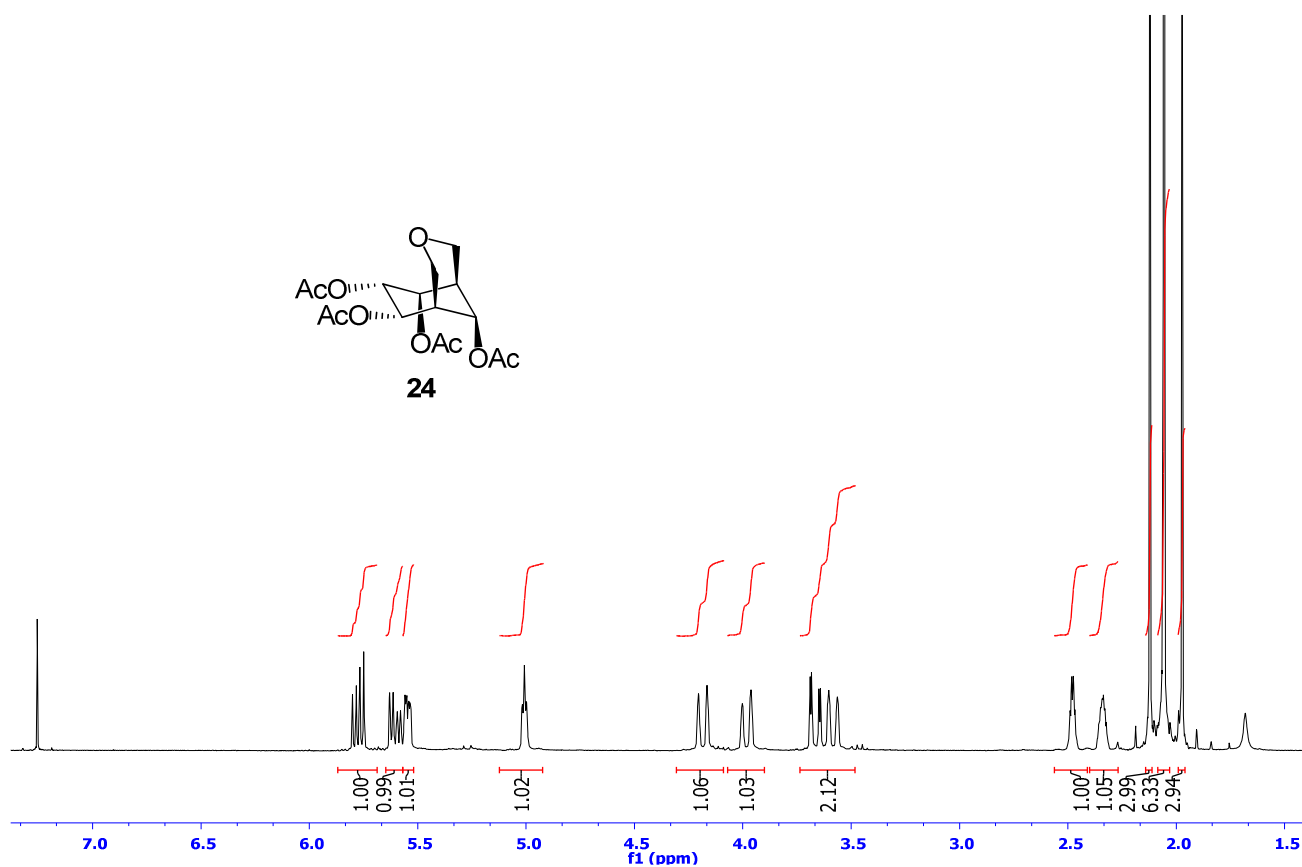

## Expanded $^1\text{H}$ NMR spectrum in $\text{CDCl}_3$

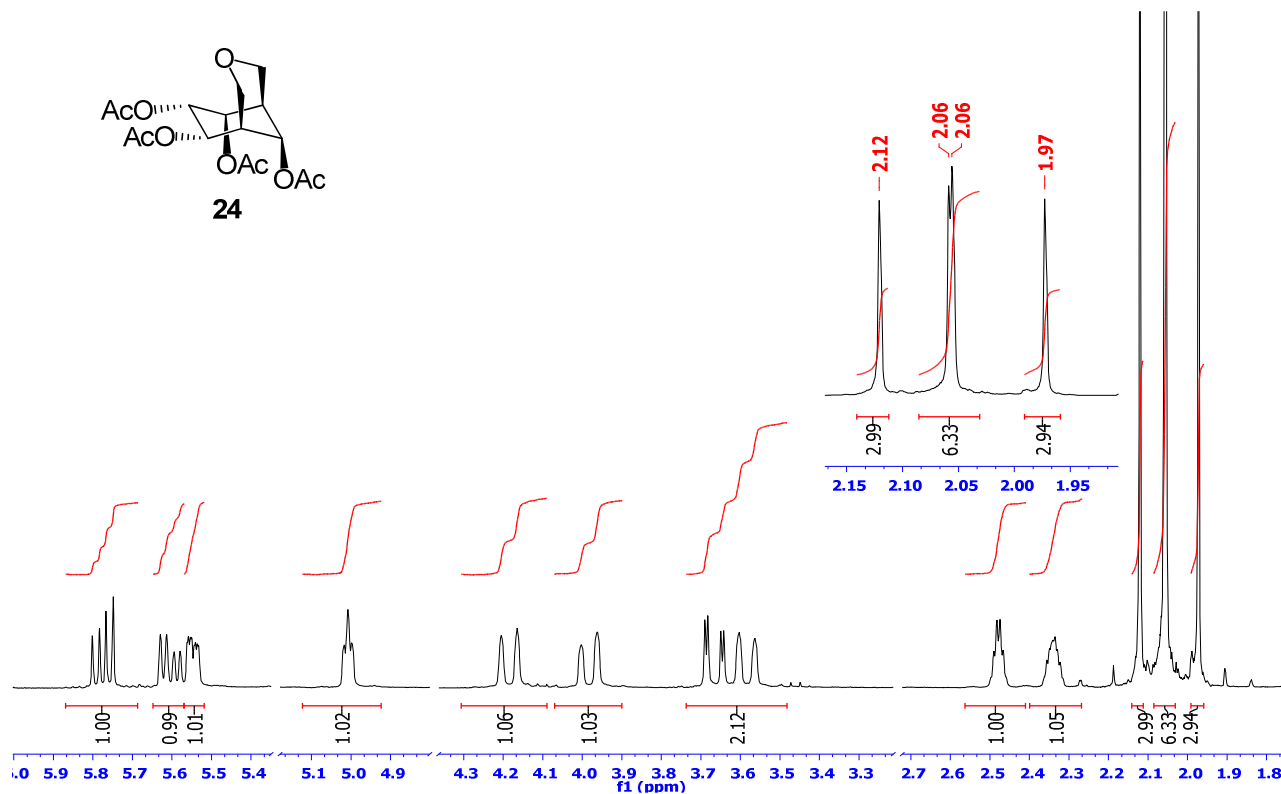

## Expanded $^1\text{H}$ NMR spectra in $\text{CDCl}_3$

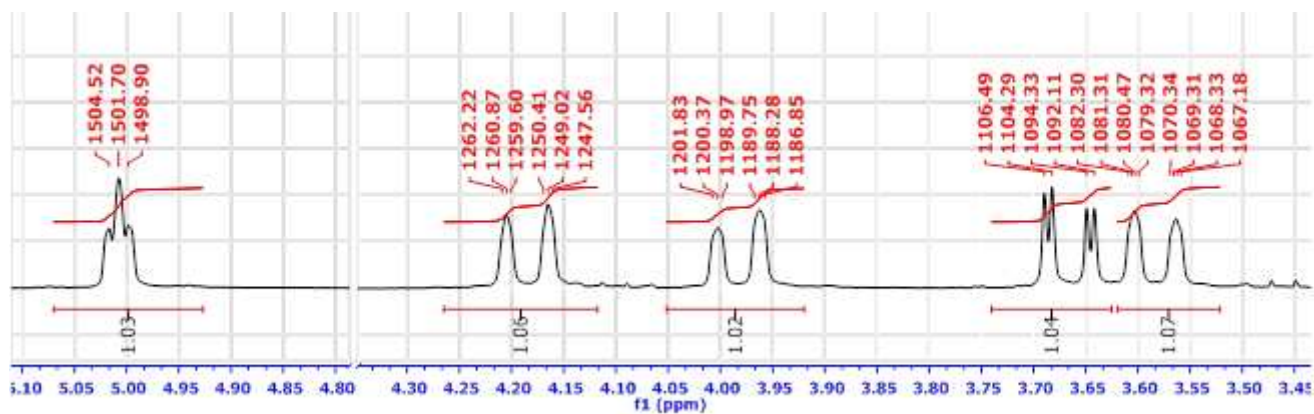

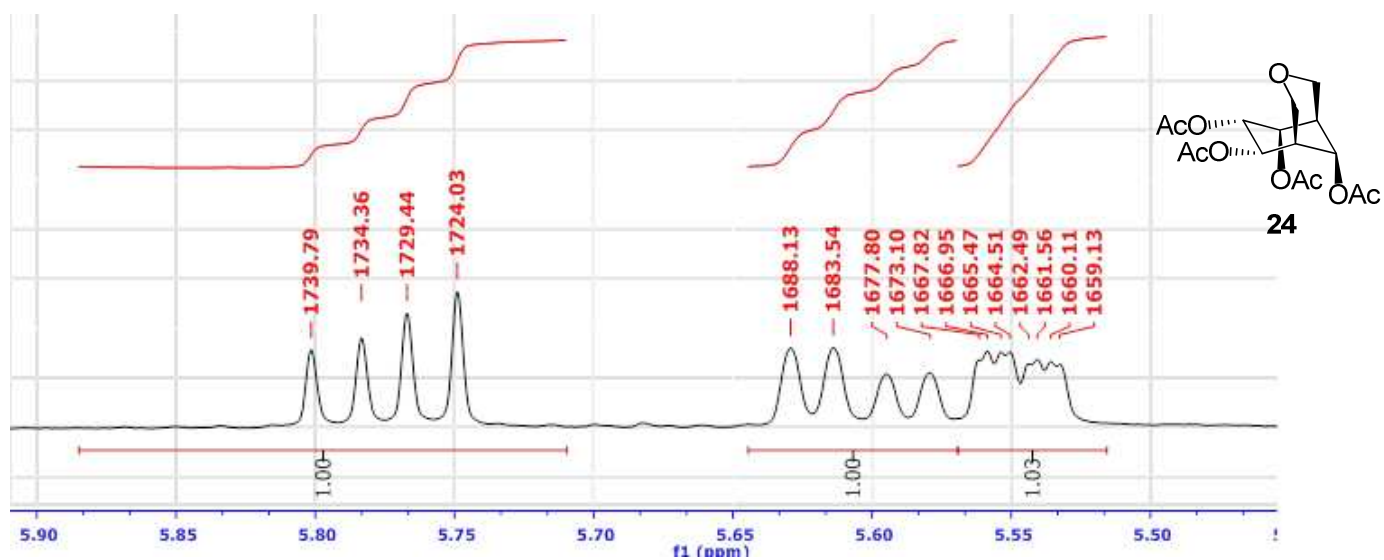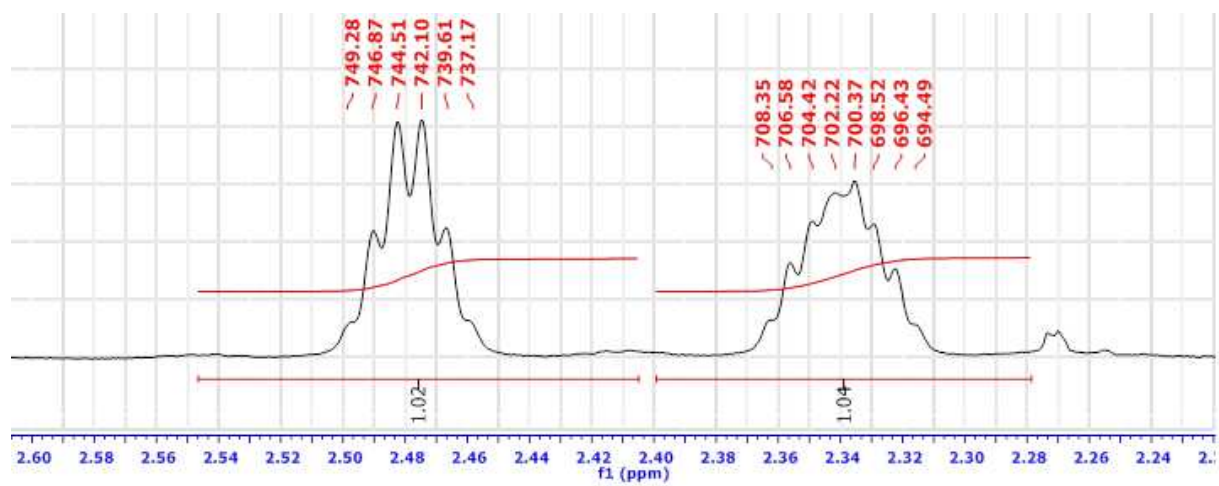

# $^{13}\text{C}$ NMR spectrum in $\text{CDCl}_3$

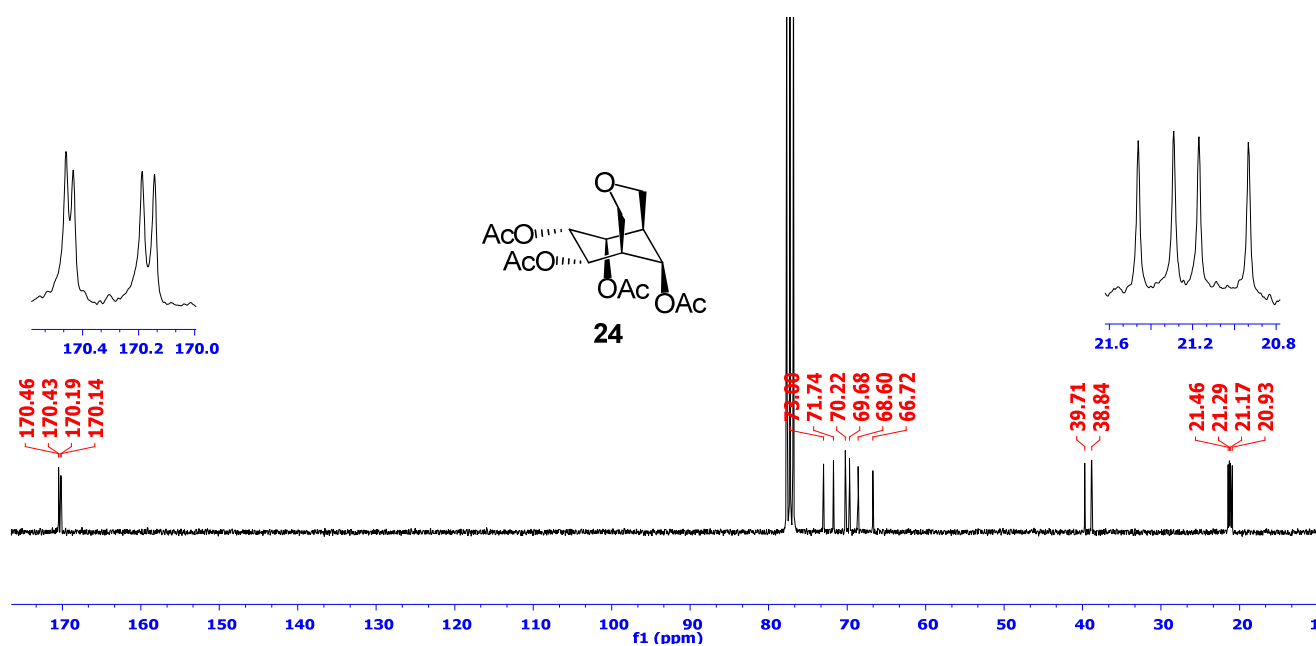

## DEPT spectrum

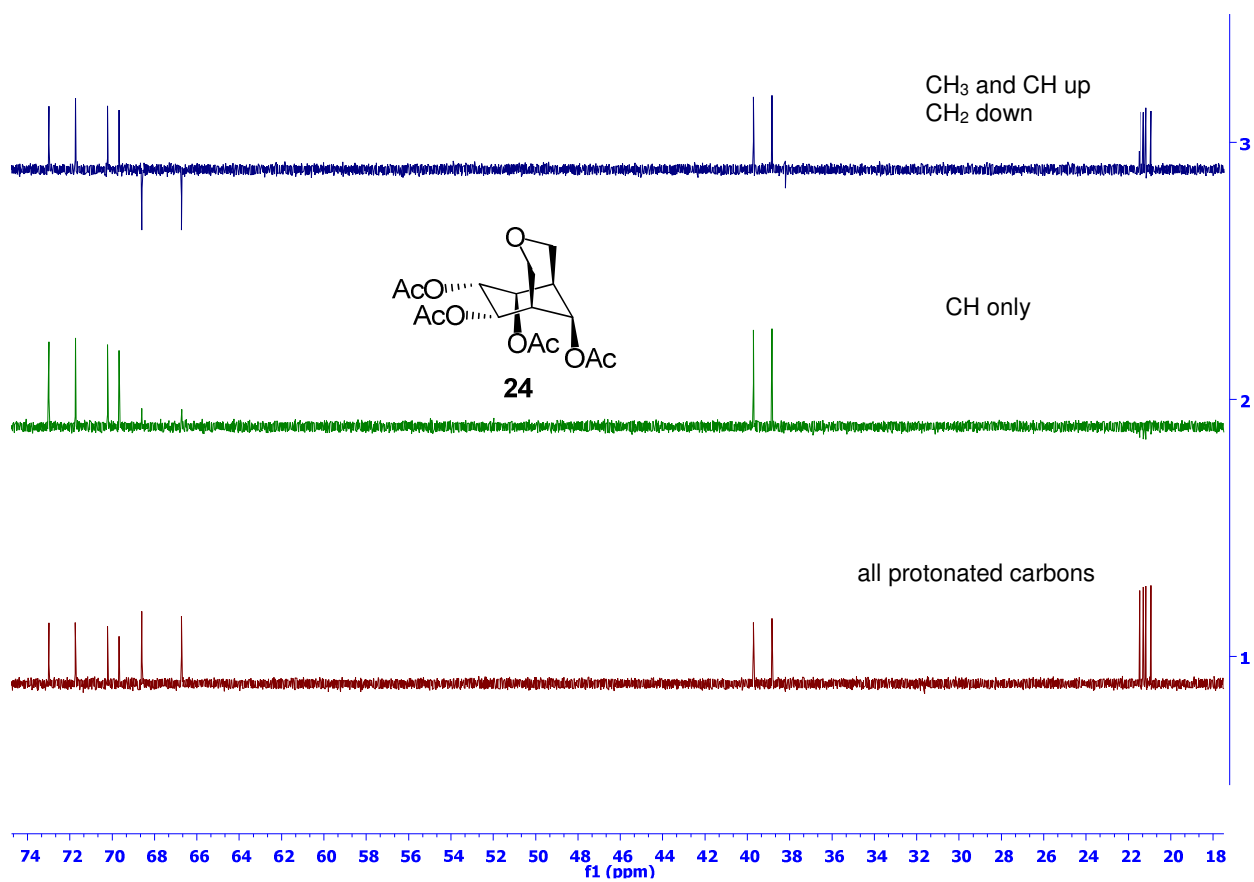

## COSY spectrum

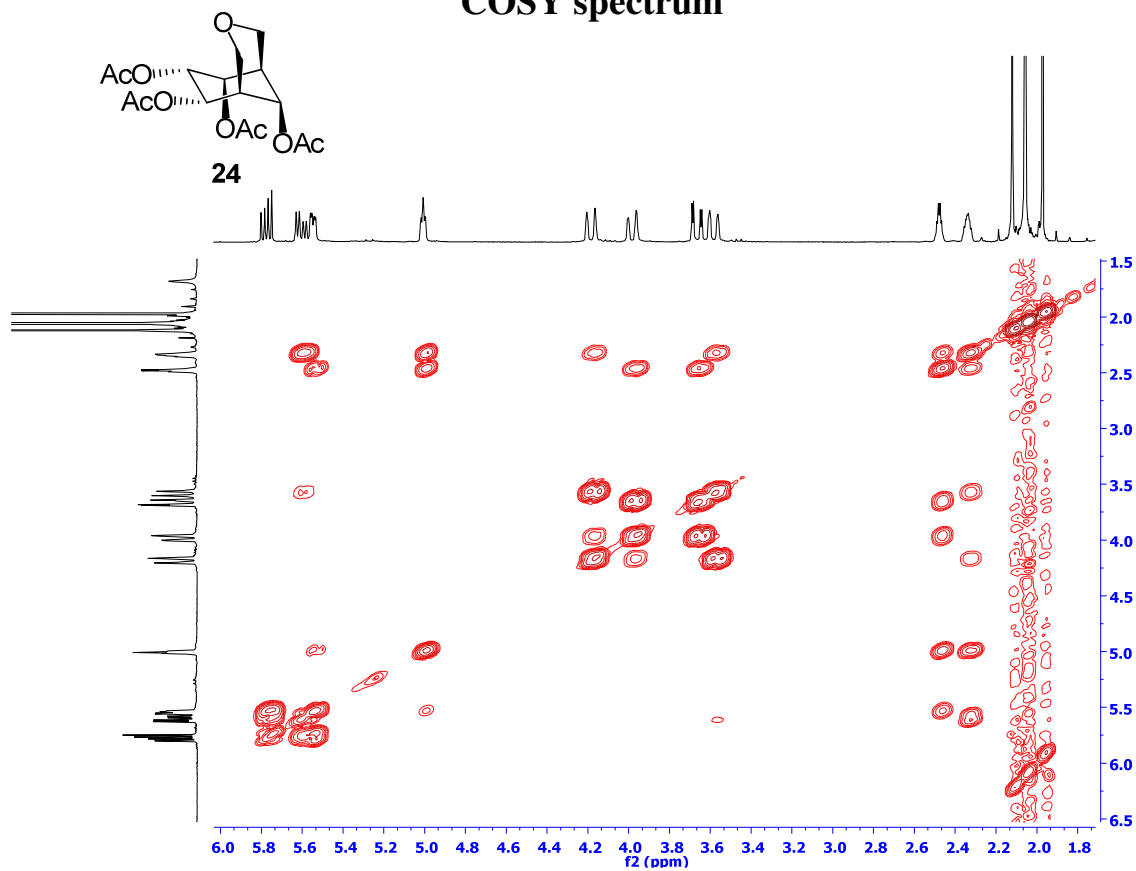

## Expanded COSY spectra

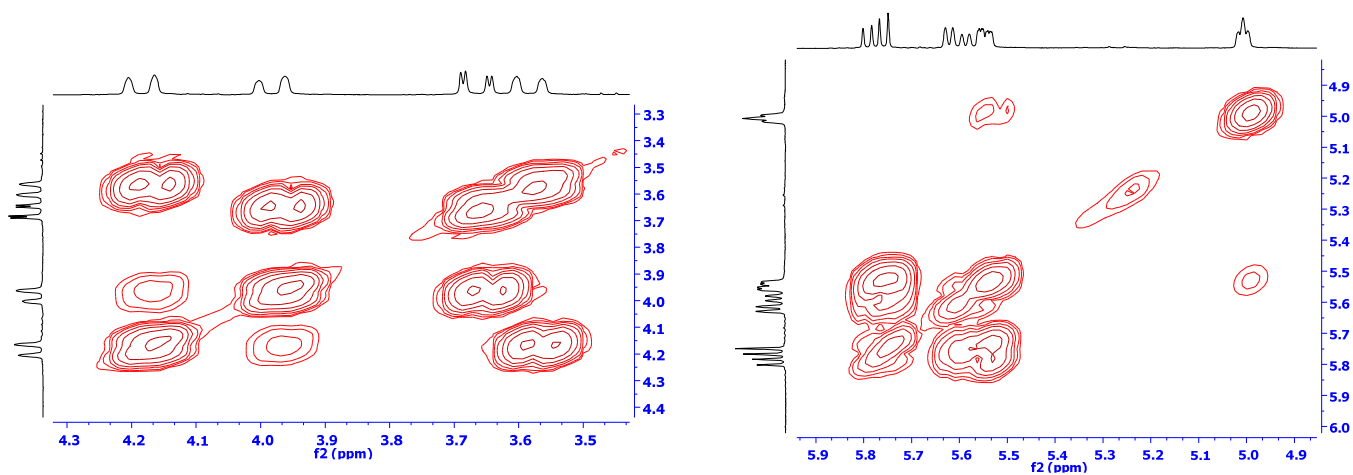



# HETCOR spectrum

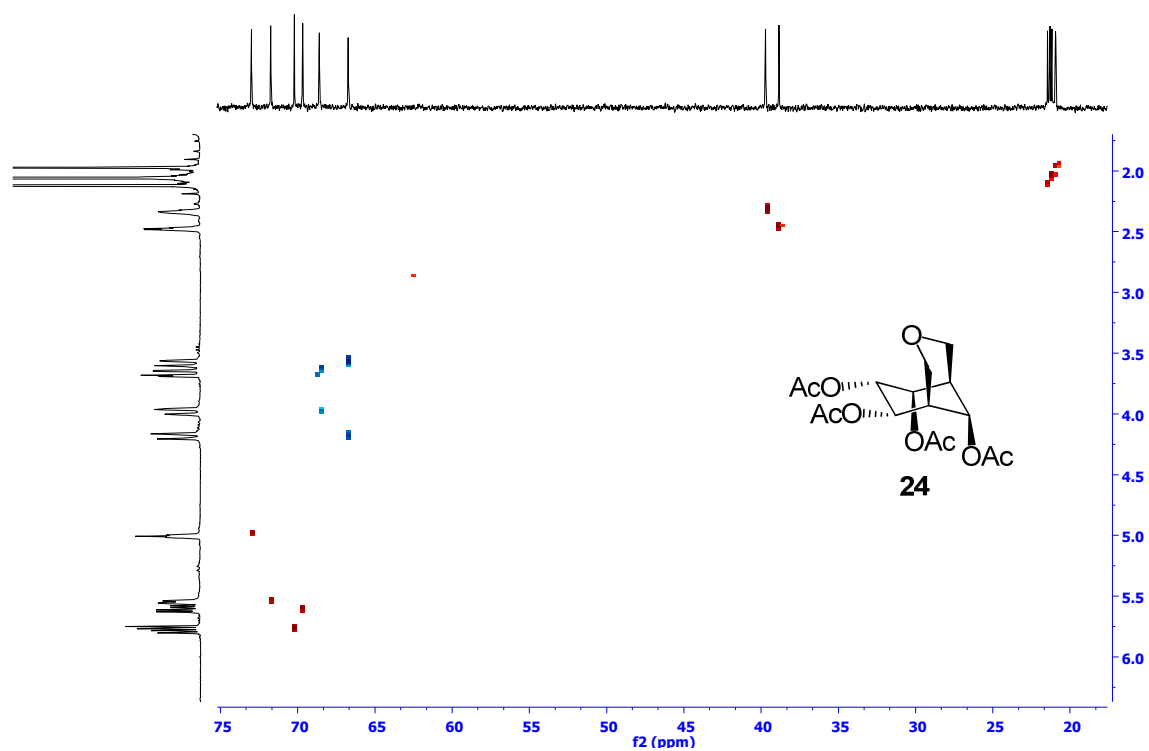

## HETCOR (expanded)

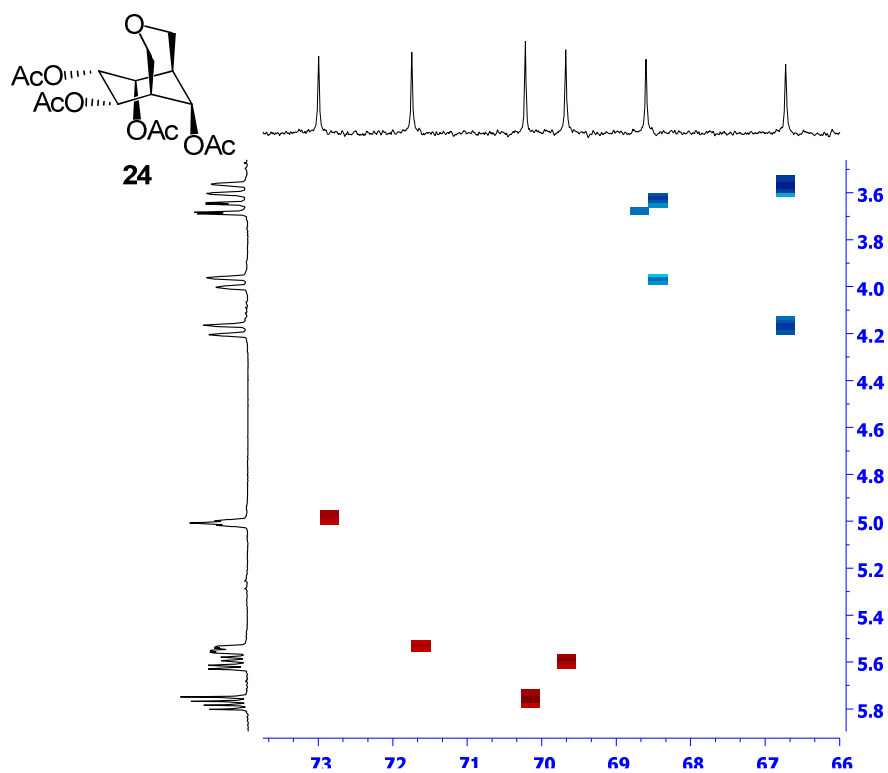

# <sup>1</sup>H NMR spectrum

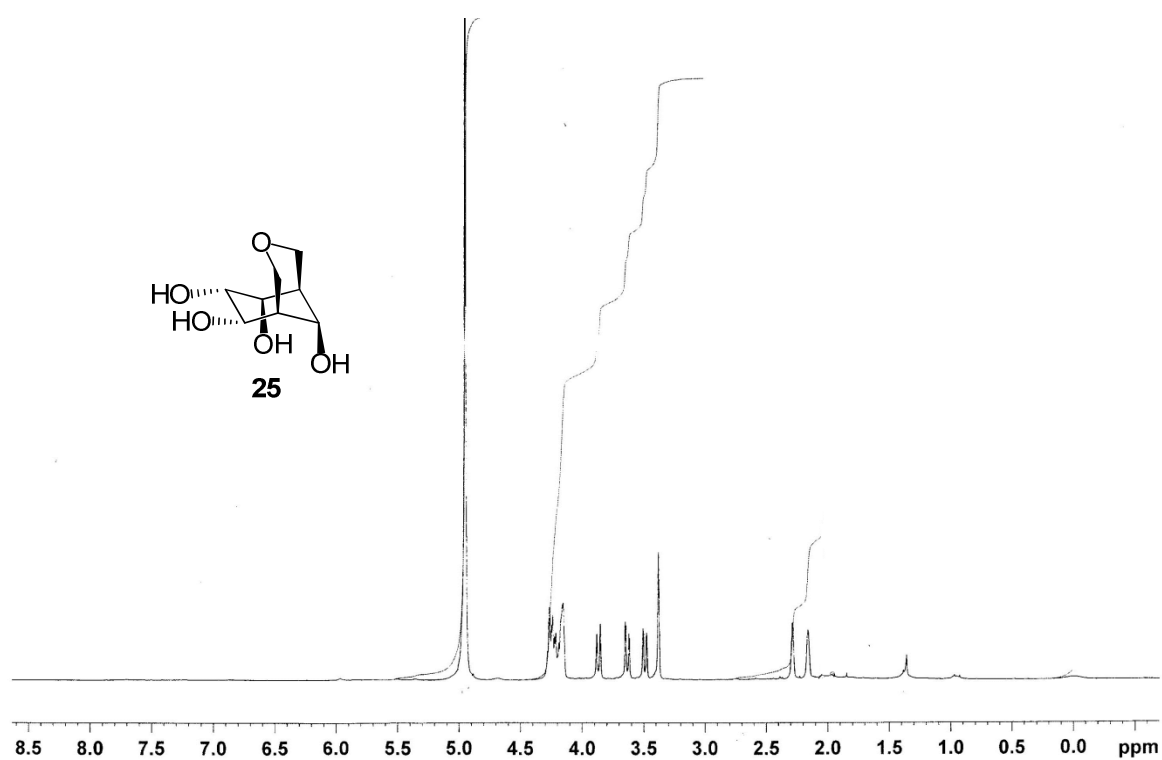

# <sup>13</sup>C NMR in CDCl<sub>3</sub>

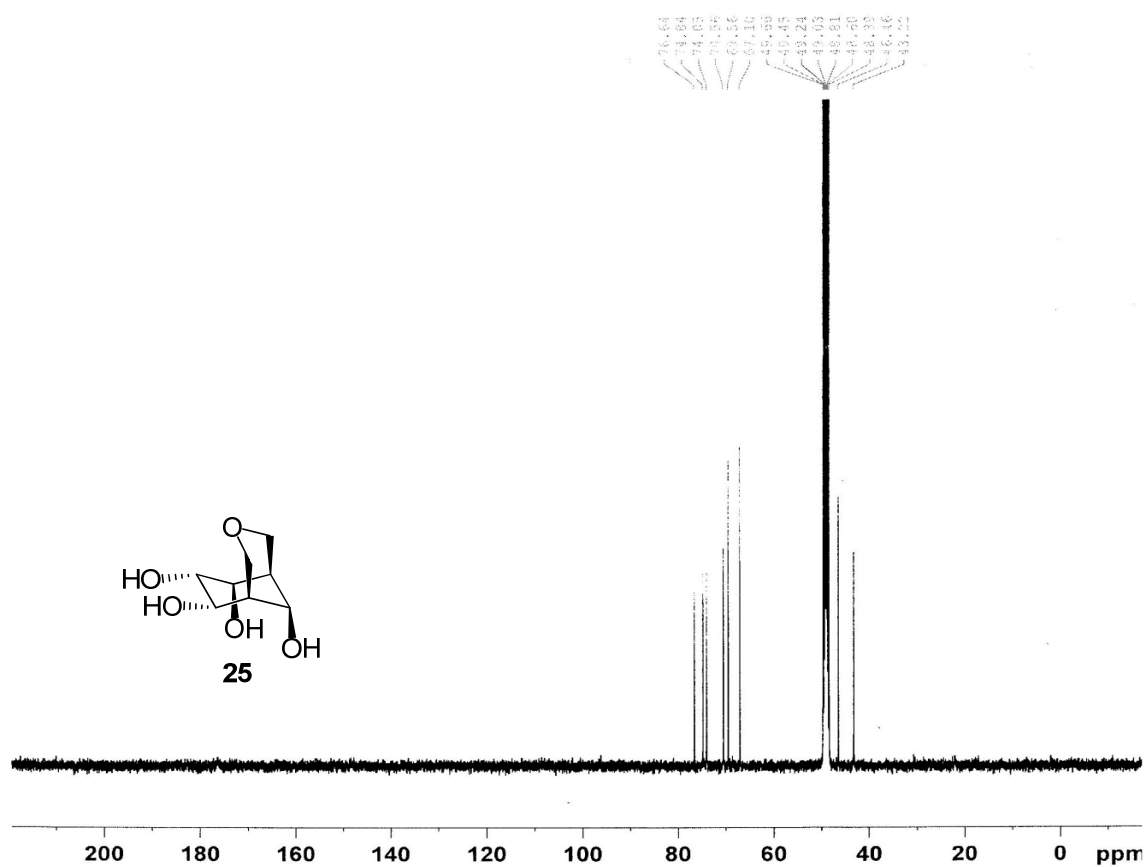

# COSY spectrum

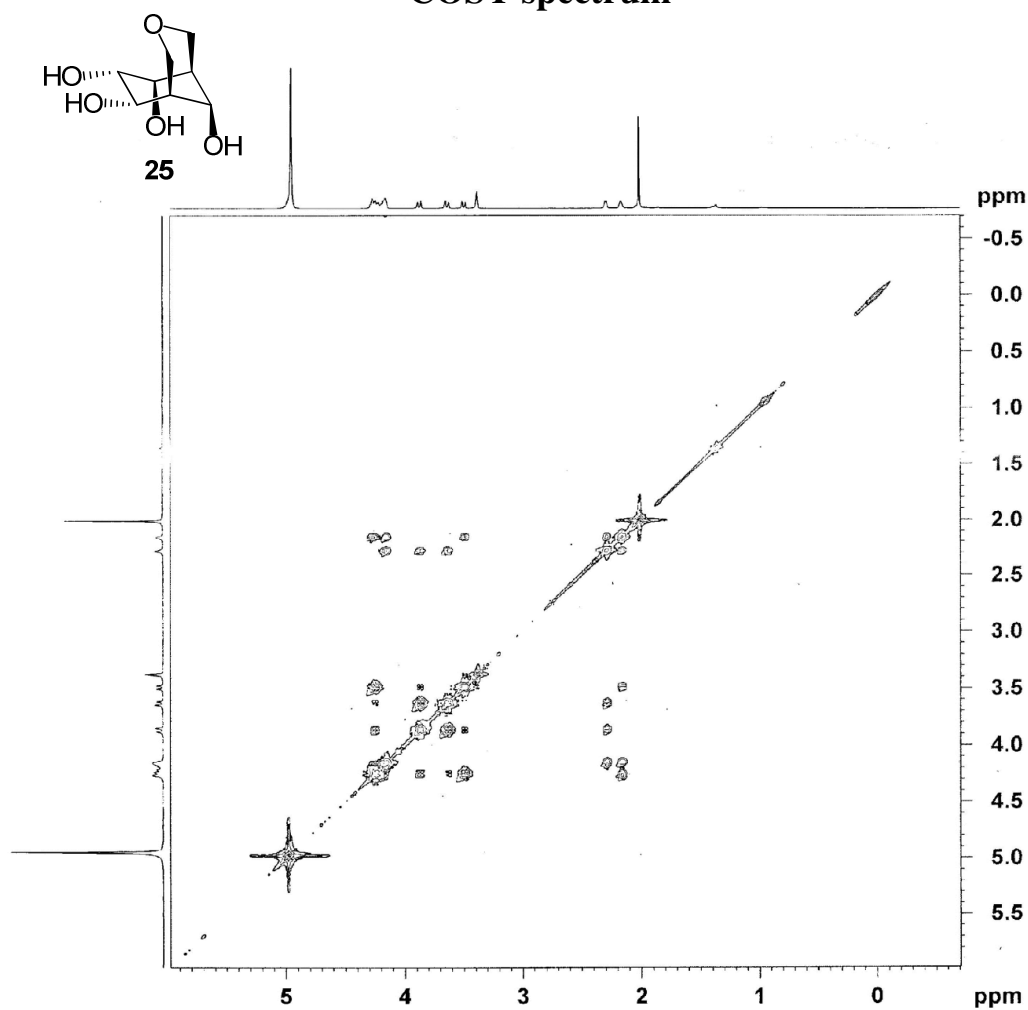

# $^1\text{H}$ NMR in $\text{CDCl}_3$

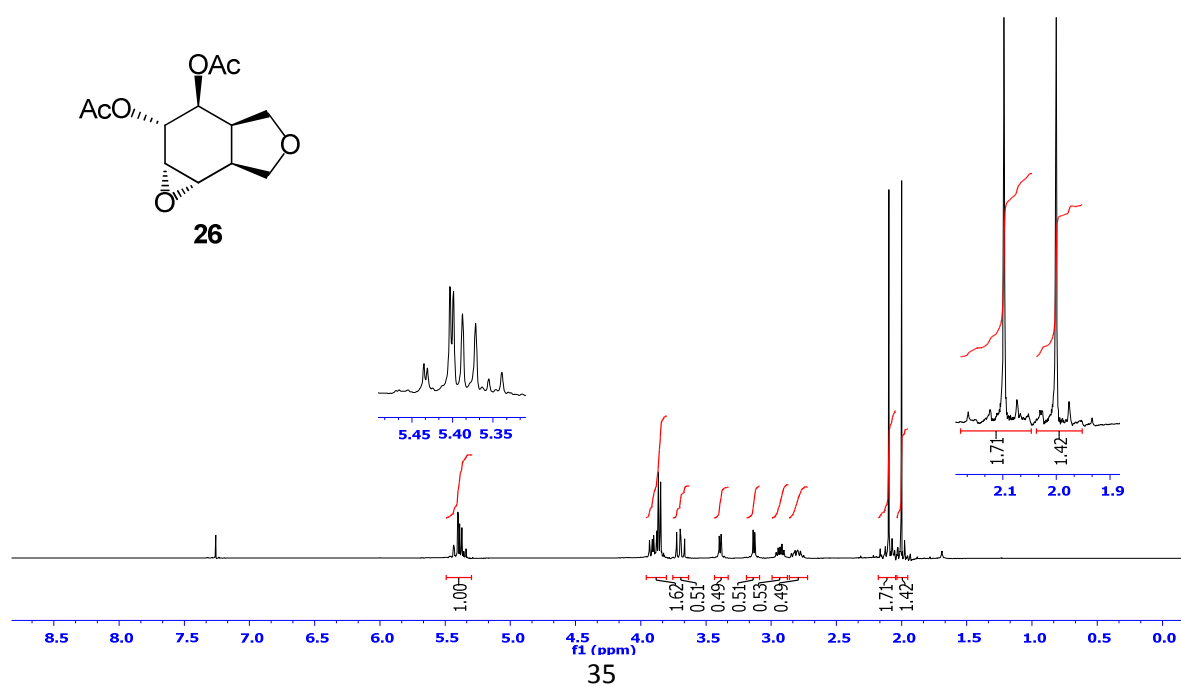

**Expanded  $^1\text{H}$  NMR spectra in  $\text{CDCl}_3$**

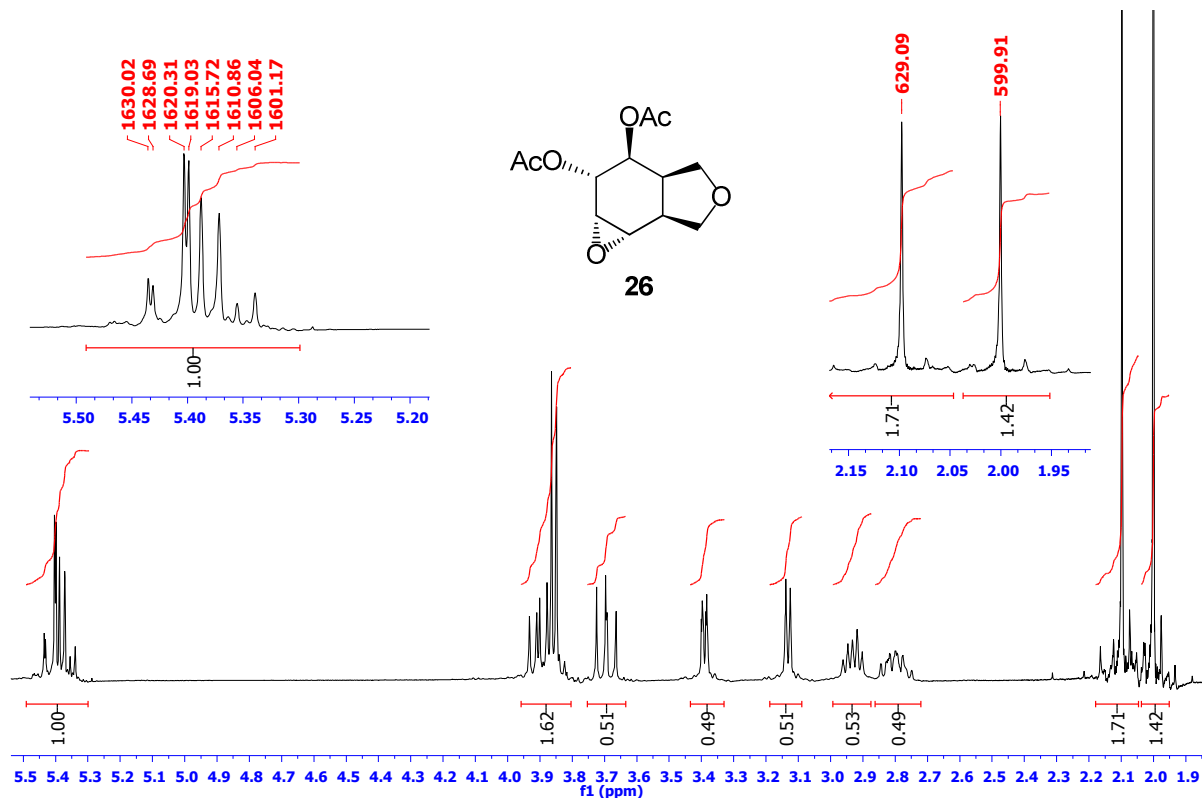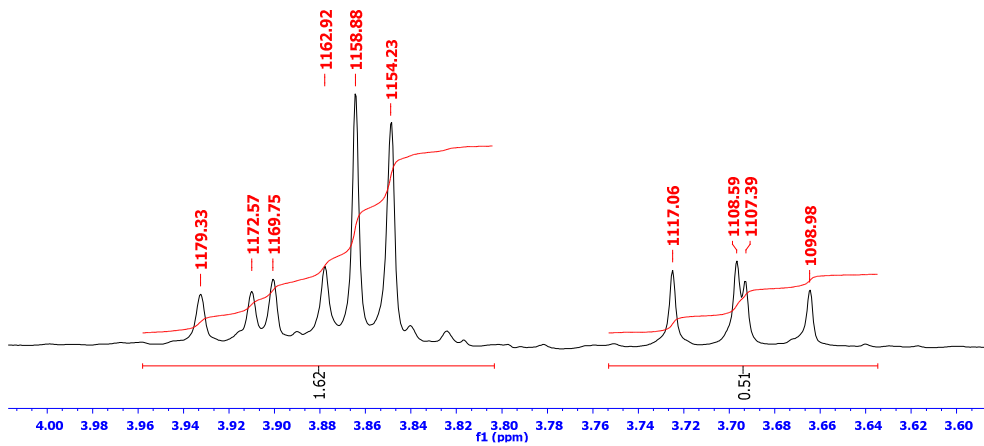

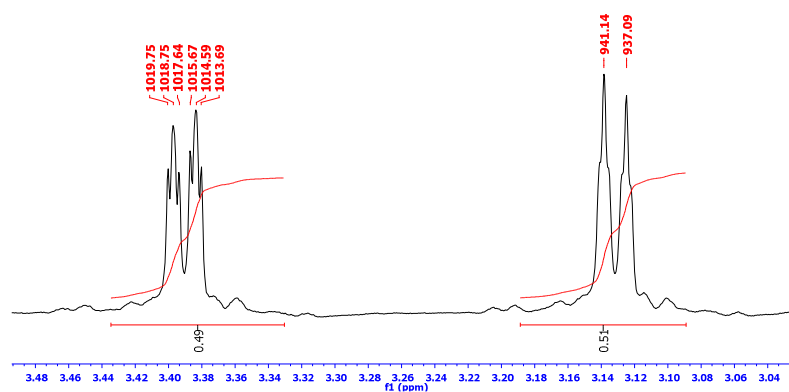

### <sup>13</sup>C NMR spectrum in CDCl<sub>3</sub>

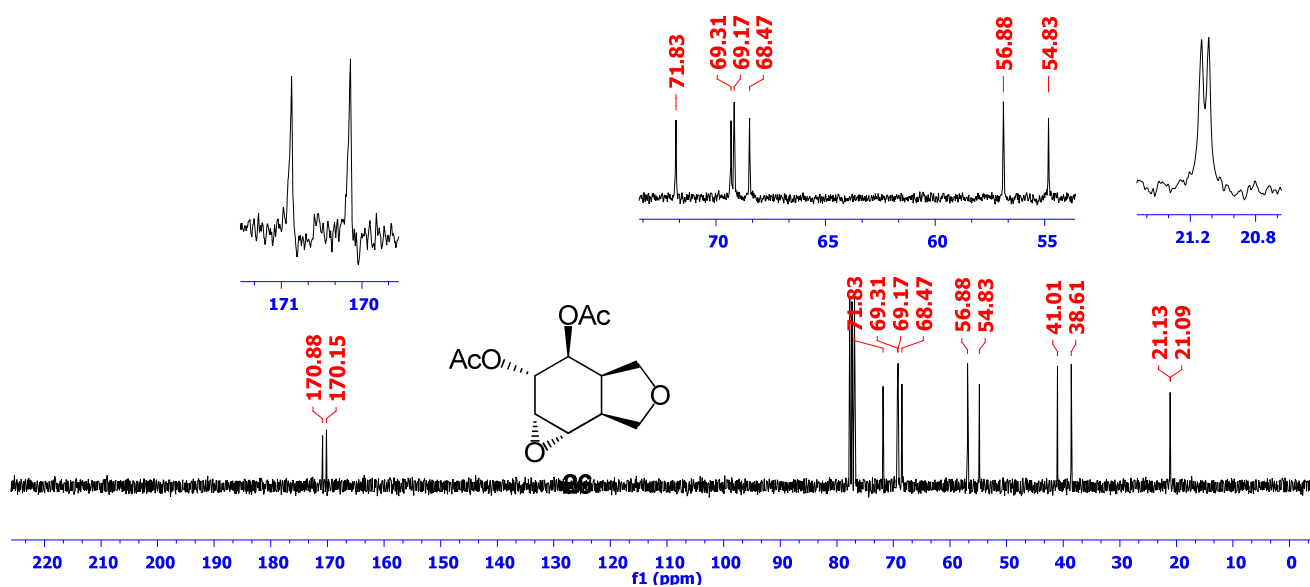

## DEPT spectrum

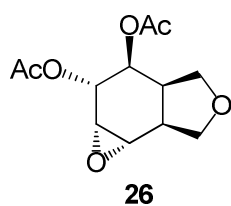

CH<sub>3</sub> and CH up  
CH<sub>2</sub> down

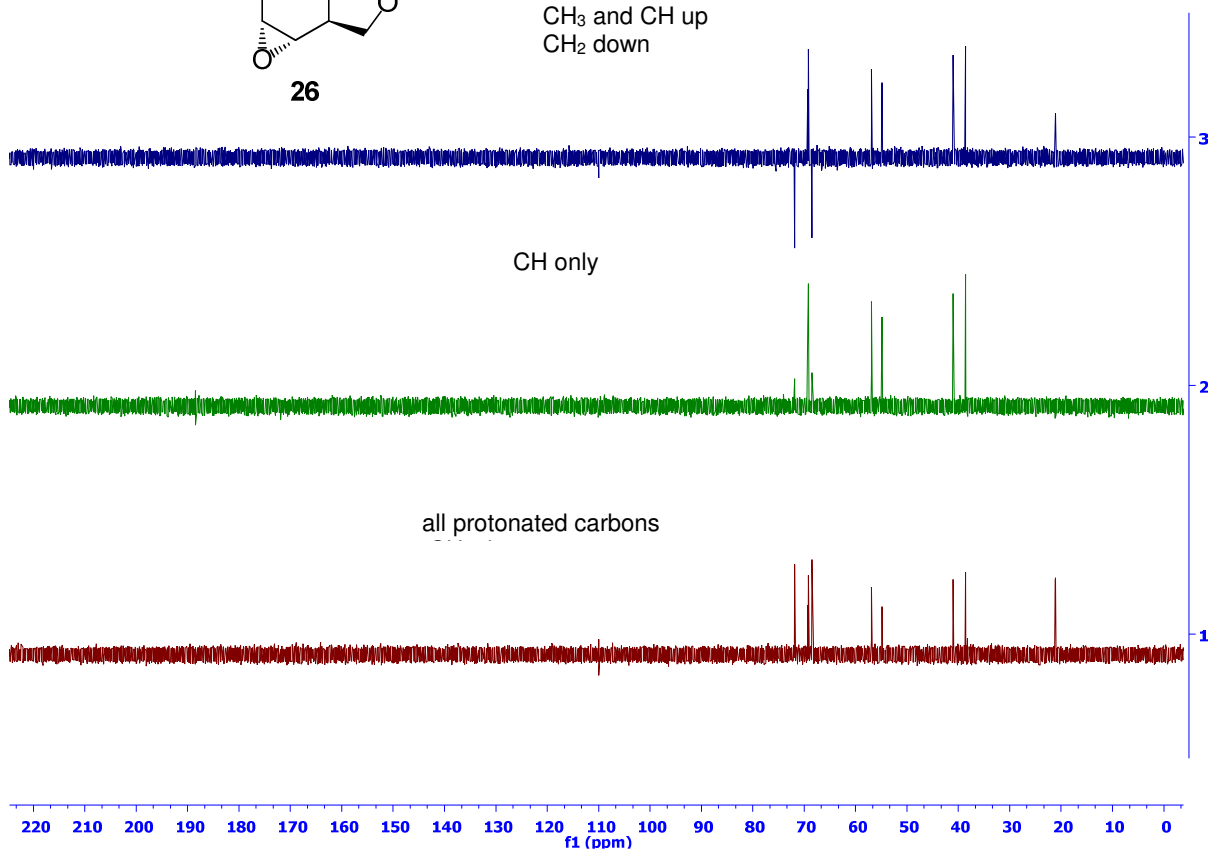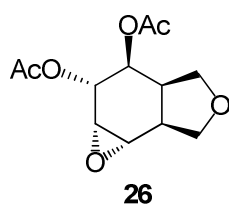

## COSY spectrum

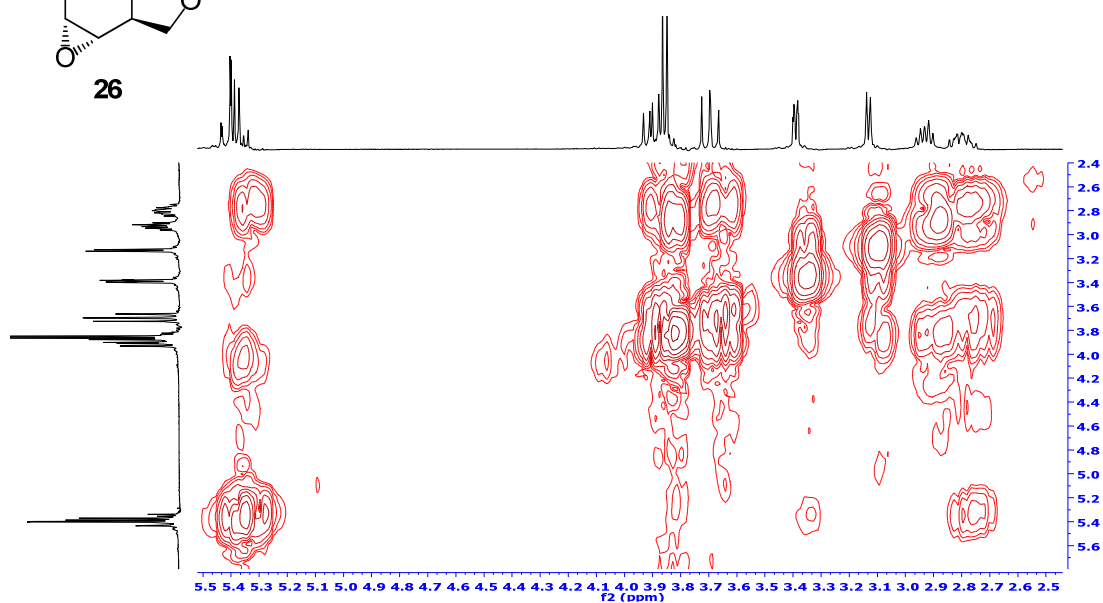

# <sup>1</sup>H NMR spectrum in CDCl<sub>3</sub>

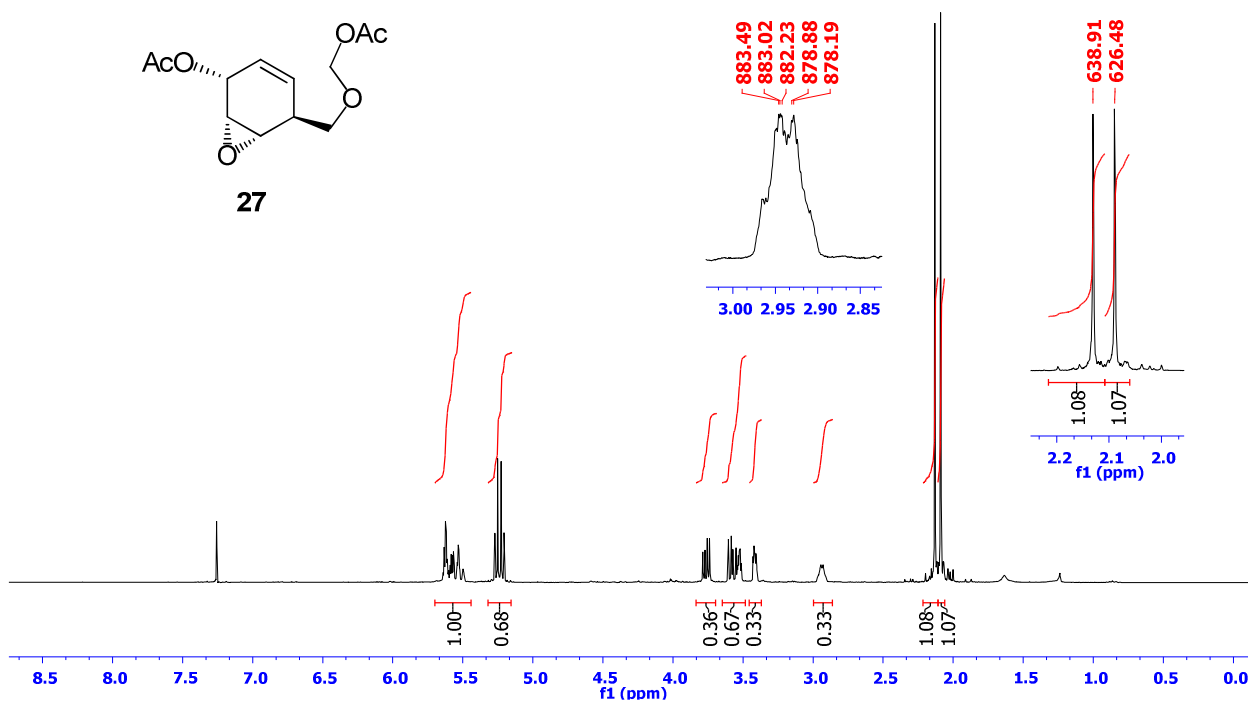

## Expanded <sup>1</sup>H NMR spectra in CDCl<sub>3</sub>

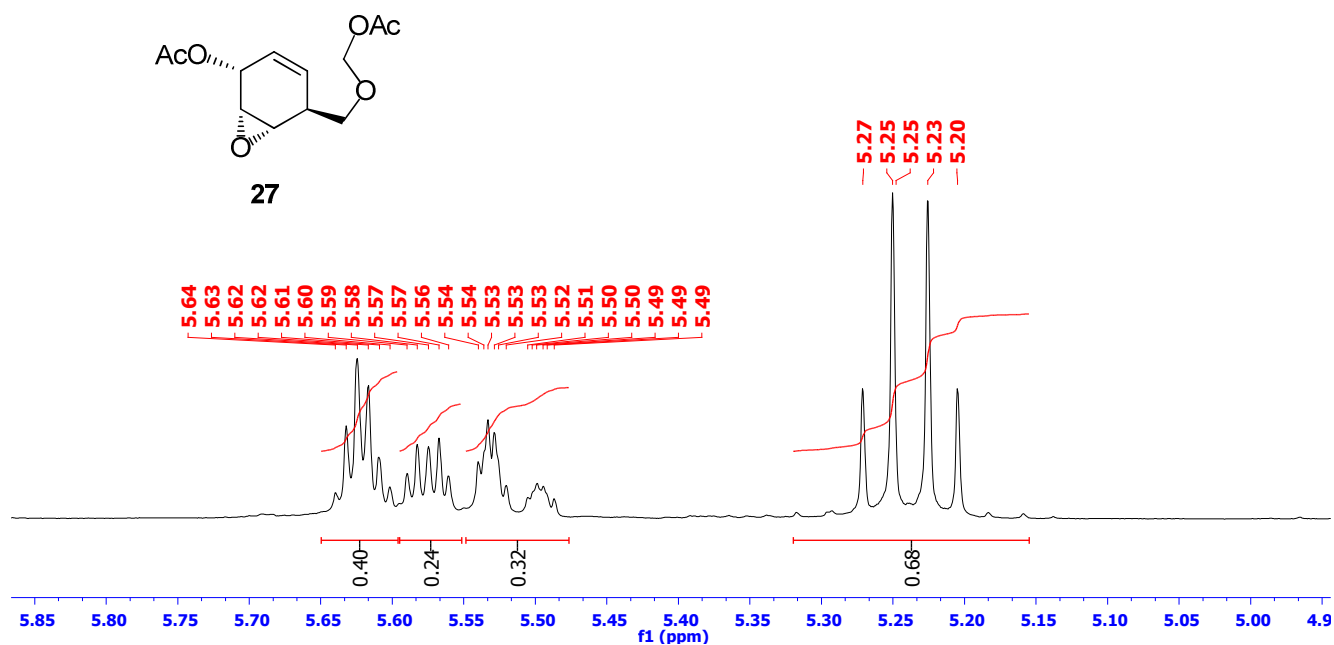

# Expanded $^1\text{H}$ NMR spectra in $\text{CDCl}_3$

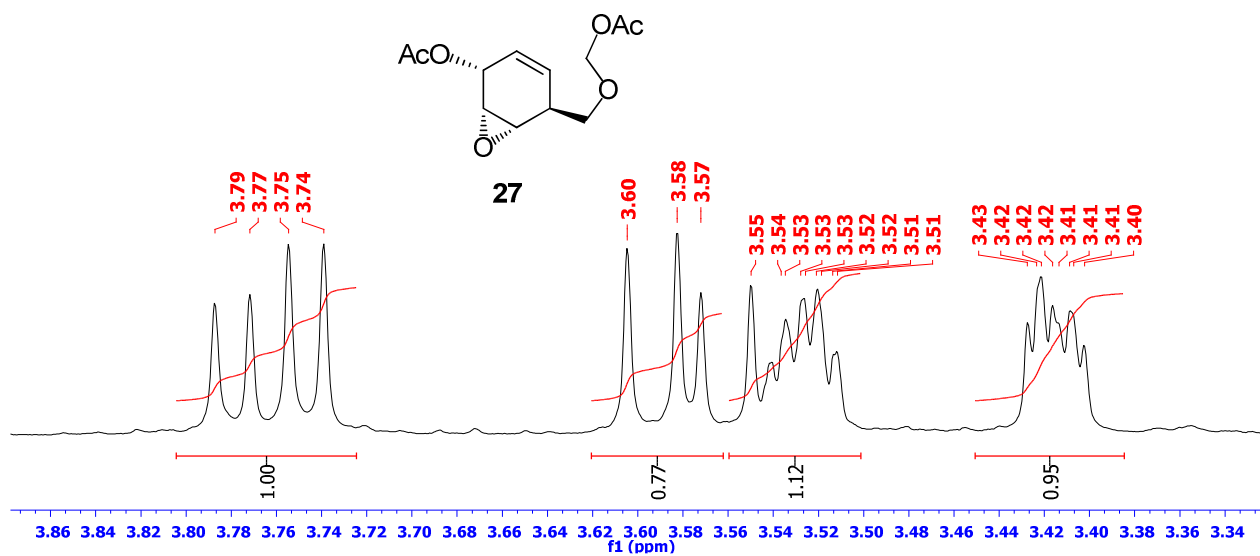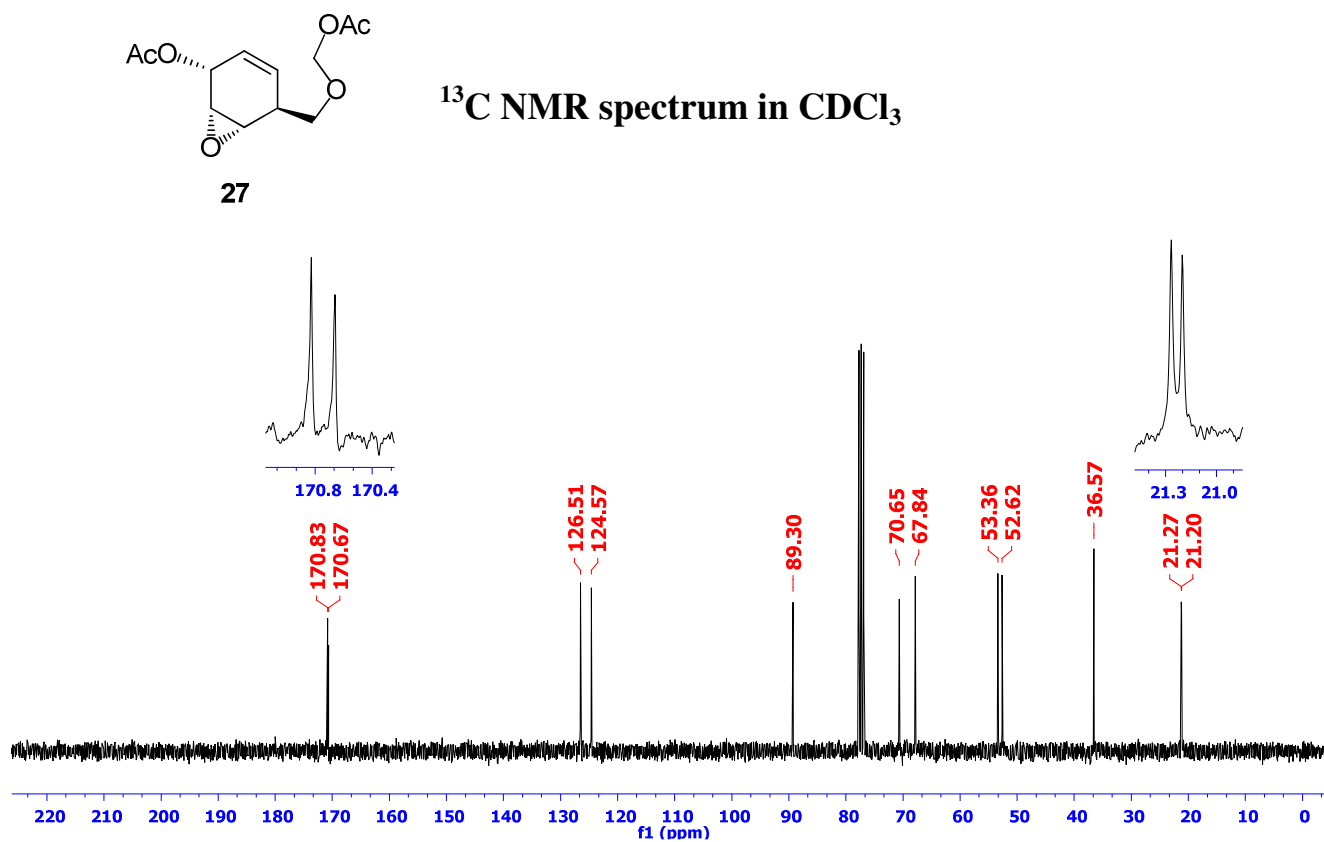



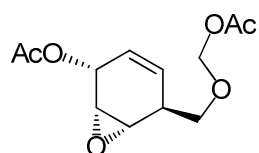

27

COSY spectrum

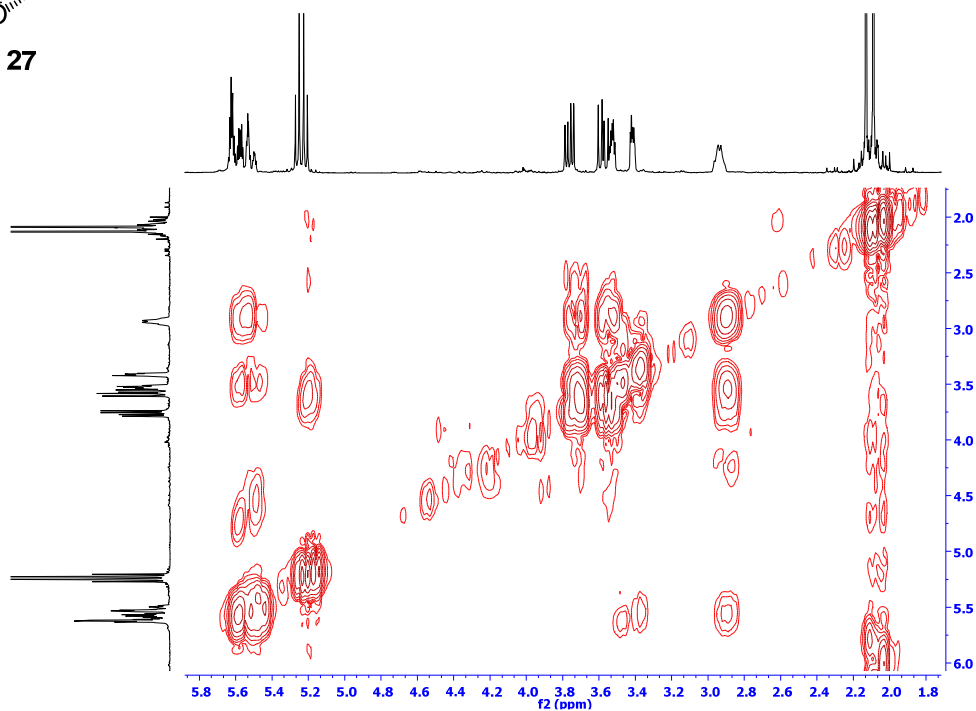

HMBC spectrum

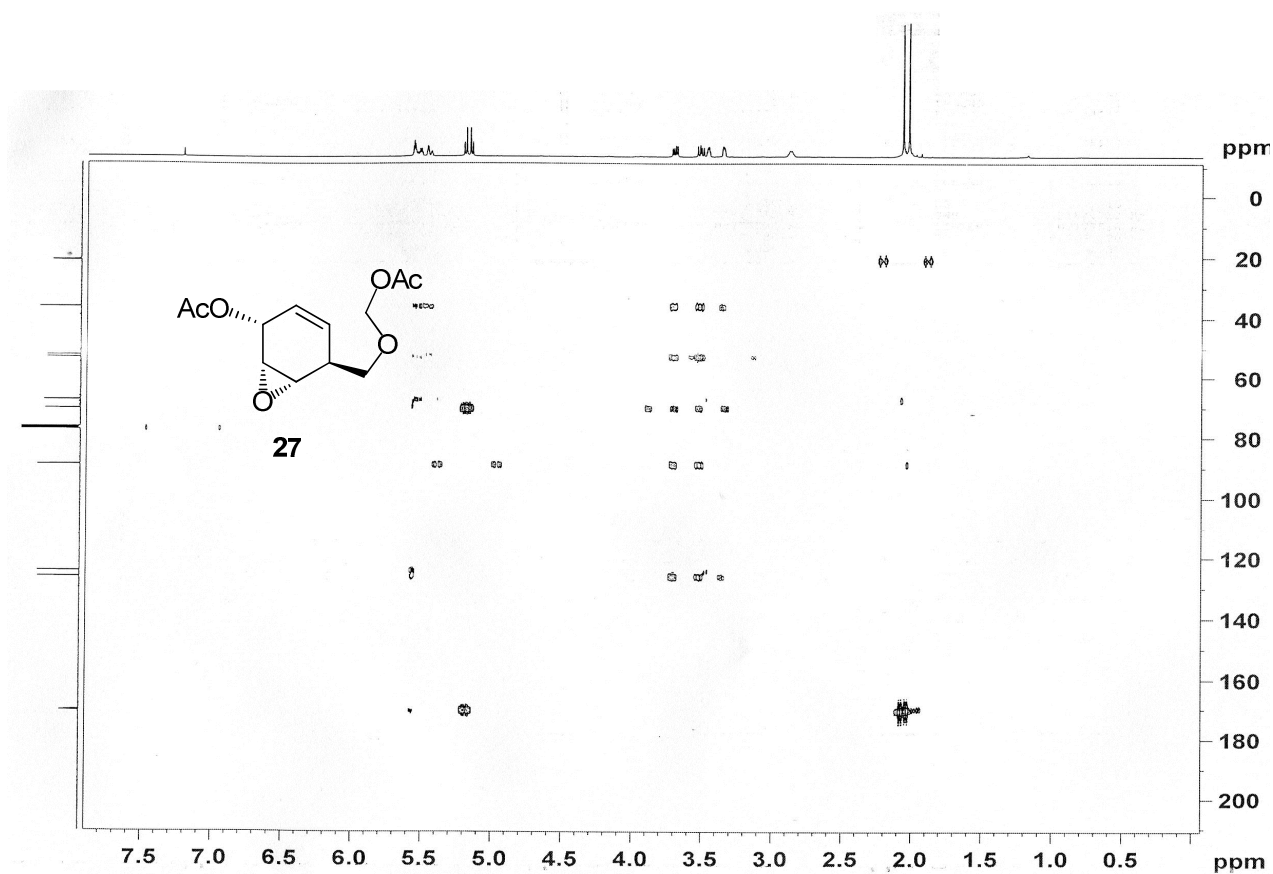

## X-Ray Structural Analysis of **24** and **12**

The absolute configuration of the compound **24** was confirmed by X-ray crystallography (Figure 1), which also confirmed the *cis* and *trans* stereochemistry of the acetate groups.

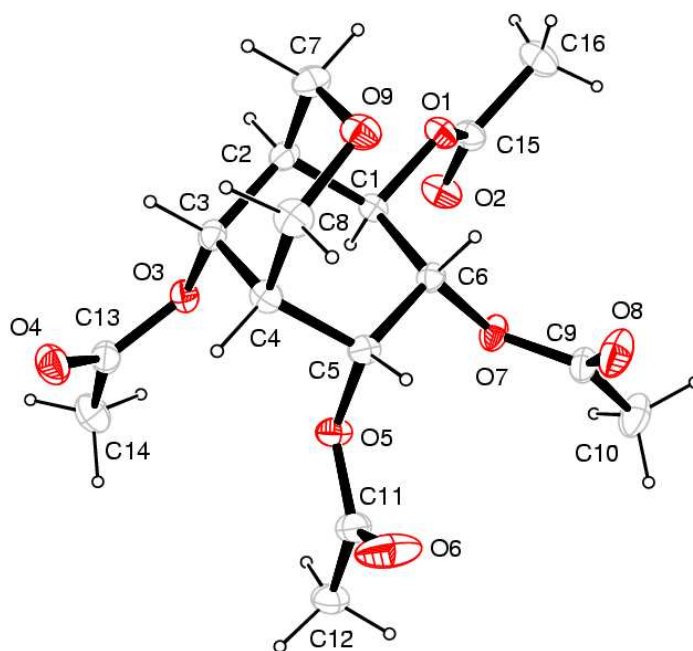

Figure 1. Atomic displacement parameters representation of structure **24** with displacement ellipsoids drawn at the 40% probability level and numbering scheme.

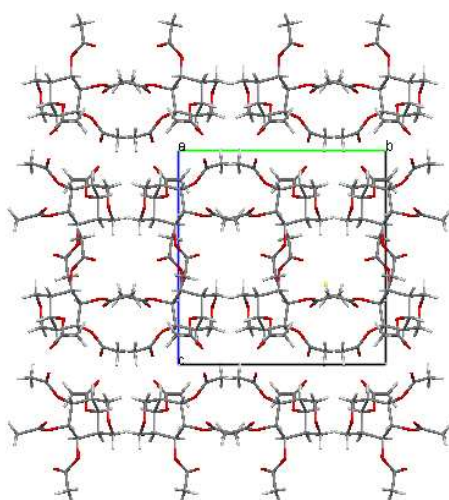

Figure 2. View of the cell packing along the *a*-axis.

**Crystallography:** For the crystal structure determination, the single-crystal of the compound **24** was used for data collection on a four-circle Rigaku R-Axis RAPID-S diffractometer (equipped with a two-dimensional area IP detector). The graphite-monochromatized Mo K $\alpha$  radiation ( $\lambda=0.71073$  Å) and oscillation scans technique with  $\Delta\omega=5^\circ$  for one image were used for data collection. The lattice parameters were determined by the least-squares methods on the basis of all reflections with  $F^2>2\sigma(F^2)$ . Integration of the intensities, correction for Lorentz and polarization effects and cell refinement was performed using CrystalClear (Rigaku/MSI Inc., 2005) software [1]. The structures were solved by direct methods using SHELXS-97 [2] and refined by a full-matrix least-squares procedure using the program SHELXL-97 [2]. All non-hydrogen atoms were refined anisotropically. The hydrogen atoms were refined by using the riding model with SHELXL-default  $d(C-H)$  values. Thermal parameters of the H atoms used were set to  $U_{iso}(H) = 1.2U_{eq}(C)$ . The final difference Fourier maps showed no peaks of chemical significance. Crystal data for 4a: C<sub>16</sub>H<sub>22</sub>O<sub>9</sub>, crystal system, space group: monoclinic,  $P2_1/a$ ; (no:14); unit cell dimensions:  $a=8.8325(4)$ ,  $b=14.1648(4)$ ,  $c=14.7778(5)$  Å,  $\alpha=90^\circ$   $\beta=99.154(5)^\circ$ ,  $\gamma=90^\circ$ ; volume:  $1825.3(2)$  Å<sup>3</sup>;  $Z=4$ ; calculated density:  $1.30$  g/cm<sup>3</sup>; absorption coefficient:  $0.107$  mm<sup>-1</sup>;  $F(000)$ : 760;  $\theta$ -range for data collection  $2.7-26.4^\circ$ ; refinement method: full-matrix least-square on  $F^2$ ; data/parameters: 3728/227; goodness-of-fit on  $F^2$ : 1.045; final  $R$  indices [ $I>2\sigma(I)$ ]:  $R_1=0.075$ ,  $wR_2=0.202$ ;  $R$  indices (all data):  $R_1=0.152$ ,  $wR_2=0.252$ ; largest diff. peak and hole: 0.250 and -0.206 e Å<sup>-3</sup>; **CCDC-855316** contains the supplementary crystallographic data for this paper. These data can be obtained free of charge from the Cambridge Crystallographic Data Centre via [www.ccdc.cam.ac.uk/data\\_request/cif](http://www.ccdc.cam.ac.uk/data_request/cif).

## References

1. Rigaku/MSI, Inc., 9009 new Trails Drive, The Woodlands, TX 77381.
2. Sheldrick, G. M., *SHELXS97* and *SHELXL97*, University of Göttingen, Germany, 1997

**Structure 12**

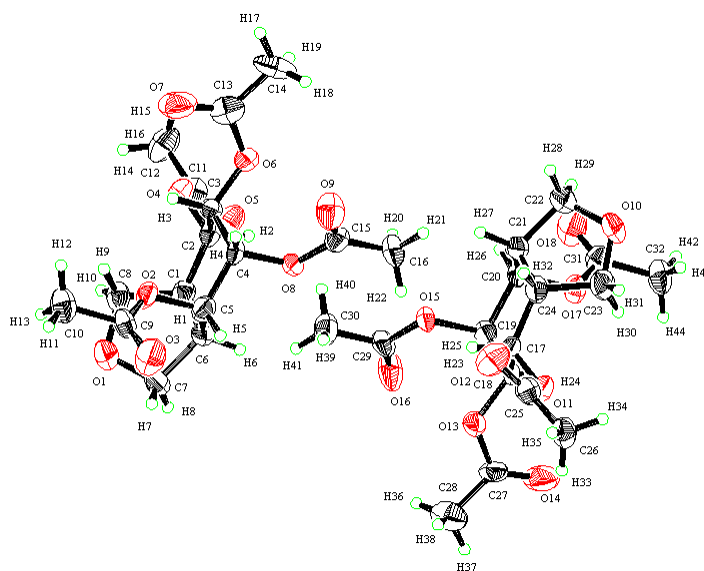

## Data Collection

A colorless chunk crystal of  $C_{16}H_{22}O_9$  having approximate dimensions of 0.70 x 0.30 x 0.20 mm was mounted on a glass fiber. All measurements were made on a Rigaku RAXIS RAPID imaging plate area detector with graphite monochromated Mo-K $\alpha$  radiation.

Indexing was performed from 0° oscillations that were exposed for 0 seconds. The crystal-to-detector distance was 127.40 mm.

Cell constants and an orientation matrix for data collection corresponded to a primitive orthorhombic cell with dimensions:

$$\begin{aligned}a &= 17.04(2) \text{ \AA} \\b &= 8.094(12) \text{ \AA} \\c &= 26.81(3) \text{ \AA} \\V &= 3697.9(83) \text{ \AA}^3\end{aligned}$$

For  $Z = 8$  and F.W. = 358.34, the calculated density is 1.29 g/cm<sup>3</sup>. Based on the systematic absences of:

$$0kl: l \pm 2n$$

$$h0l: h \pm 2n$$

packing considerations, a statistical analysis of intensity distribution, and the successful solution and refinement of the structure, the space group was determined to be:

$$Pca2_1 \text{ (\#29)}$$

The data were collected at a temperature of  $20 \pm 1^\circ\text{C}$  to a maximum  $2\theta$  value of  $50.1^\circ$ . A total of 135 oscillation images were collected. A sweep of data was done using  $\omega$  oscillations from 0.0 to  $180.0^\circ$  in  $4.0^\circ$  steps. The exposure rate was 30.0 [sec./°]. The detector swing angle was  $0.08^\circ$ . A second sweep was performed using  $\omega$  oscillations from 0.0 to  $180.0^\circ$  in  $4.0^\circ$  steps. The exposure rate was 30.0 [sec./°]. The detector swing angle was  $0.08^\circ$ . Another sweep was performed using  $\omega$  oscillations from 0.0 to  $180.0^\circ$  in  $4.0^\circ$  steps. The exposure rate was 30.0 [sec./°]. The detector swing angle was  $0.08^\circ$ . The crystal-to-detector distance was 127.40 mm. Readout was performed in the 0.100 mm pixel mode.

### Data Reduction

Of the 113812 reflections that were collected, 3726 were unique ( $R_{\text{int}} = 0.047$ ); equivalent reflections were merged.

The linear absorption coefficient,  $\mu$ , for Mo-K $\alpha$  radiation is  $1.1 \text{ cm}^{-1}$ . An empirical absorption correction was applied which resulted in transmission factors ranging from 0.78 to 1.00. The data were corrected for Lorentz and polarization effects.

### Structure Solution and Refinement

The structure was solved by direct methods and expanded using Fourier techniques. The non-hydrogen atoms were refined anisotropically. Hydrogen atoms were refined using the riding model.

**CCDC- 852778** contains the supplementary crystallographic data for this paper. These data can be obtained free of charge from the Cambridge Crystallographic Data Centre via [www.ccdc.cam.ac.uk/data\\_request/cif](http://www.ccdc.cam.ac.uk/data_request/cif).

## Experimental Section

**General:** Melting points are uncorrected. Infrared spectra were obtained from solution in 0.1 mm cells or KBr pellets on a regular instrument. The  $^1\text{H}$  and  $^{13}\text{C}$  NMR spectra were recorded on 300 (75) and 400 (100) MHz spectrometers. Apparent splitting is given in all cases. Column chromatography was performed on silica gel (60-mesh, Merck), TLC was carried out on Merck 0.2 mm silica gel 60 F<sub>254</sub> analytical aluminum plates.
